# Supplementary material for: Kinetic resolution of alkyne-substituted quaternary oxindoles via copper catalysed azide–alkyne cycloadditions
Source: Royal Society of Chemistry journal article supplement (doi:10.1039/c5cc04886a), 2015-01-01
Supplement: c5cc04886a1.pdf [file c5cc04886a1.pdf]

## Supporting Information

### Kinetic Resolution of Terminal Alkyne Substituted Quaternary Oxindoles via Copper Catalysed Azide-Alkyne Cycloadditions

William D. G. Brittain,<sup>a</sup> Benjamin R. Buckley,<sup>b\*</sup> and John S. Fossey,<sup>a\*</sup>

<sup>a</sup>School of Chemistry, University of Birmingham, Edgbaston, Birmingham, West Midlands, B15 2TT, UK

<sup>b</sup>Department of Chemistry, Loughborough University, Loughborough, Leicestershire, LE11 3TU, UK

#### Contents

|                               |    |
|-------------------------------|----|
| General .....                 | 1  |
| Synthesis and screening ..... | 2  |
| Screening Tables .....        | 13 |
| NMR Data .....                | 16 |
| References .....              | 67 |

#### General

Reagents were used as purchased from suppliers without further purification; in cases where anhydrous solvents were required they were dried using a solvent purification system (SPS) which is monitored by Karl-Fisher titrations for water levels. <sup>1</sup>H NMR spectra were recorded at 300 MHz using a Bruker AVIII 300 NMR spectrometer. <sup>19</sup>F NMR spectra were recorded at 282 MHz using a Bruker AVIII 300 NMR spectrometer. <sup>13</sup>C NMR experiments were carried out on a Bruker AVIII400 NMR spectrometer recorded at 101 MHz; in cases where it was required 2D NMR techniques were used to confirm compound identity. <sup>1</sup>H NMR chemical shifts are reported in ppm relative to TMS (δ 0.00) and <sup>13</sup>C NMR relative to chloroform (δ 77.36). Reactions carried out at low temperatures were cooled using a Lab Plant Cryoprobe. Melting points were carried out in triplicate and an average of the values taken and reported as a range using Stuart SMP10 melting point apparatus. IR spectra were recorded on a PerkinElmer 100FT-IR spectrometer at room temperature using ATR. Optical rotations were

recorded on a polar 2001 Automatic Polarimeter. Measurements of each sample were recorded three times and used as an average. HPLC analysis was carried out using a Shimadzu LC2010 and Phenomenex Lux cellulose 3 chiral column, traces were recorded at four UV wavelengths 210, 220, 254 and 280nm, calculations were carried out using the supplied traces recorded at 254 nm. Column chromatography was carried out using a Combiflash Rf 200i, column traces were recorded at two UV wavelengths (254 nm and 280nm).

## Synthesis and screening

### Synthesis of 3-methyl-3-(prop-2-yn-1-yl)indolin-2-one

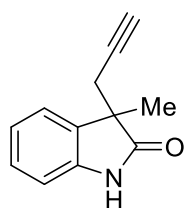

n-Butyl lithium in hexanes (1.5 M, 8.15 mmol, 5.09 mL, 1.2 equiv.) was transferred into a nitrogen flushed flask, THF (40 mL) was added and the solution cooled to  $-78^{\circ}\text{C}$ . A solution of 3-methyl-2-oxindole (1.00 g, 6.79 mmol, 1 equiv.) dissolved in THF (10 mL) was added dropwise under stirring. The reaction mixture was stirred for 10 minutes before propargyl bromide (7.13 mmol, 0.76 mL, 1.05 equiv.) was added. The solution was allowed to warm to room temperature and stirred for 3 h. Methanol (20 mL) was added to decompose any remaining butyl lithium. The solution was concentrated *in vacuo* and the residual oil extracted with water (50 mL) and ethyl acetate (3 x 50 mL). The organic phase was dried over  $\text{MgSO}_4$  and concentrated *in vacuo*. The oil was then purified using automated column chromatography combiflash Rf (0-25% EtOAc : Hexane gradient 20 mins) to yield the product as a cream solid 0.69 g, 55% yield.

$^1\text{H}$  NMR (300 MHz,  $\text{CDCl}_3$ )  $\delta$  7.75 (s, 1H), 7.42 (d,  $J = 7.4$  Hz, 1H), 7.29 – 7.21 (m, 2H), 7.07 (td,  $J = 7.6, 1.0$  Hz, 1H), 6.91 (d,  $J = 7.7$  Hz, 1H), 2.63 (ABqd,  $J = 16.6, 2.7$  Hz, 2H),

1.98 (t,  $J = 2.7$  Hz, 1H), 1.48 (s, 3H);  $^{13}\text{C}$  NMR (101 MHz,  $\text{CDCl}_3$ )  $\delta$  182.08, 140.24, 133.47, 128.22, 123.53, 122.54, 109.97, 79.55, 70.85, 47.21, 27.58, 21.93; IR  $\nu_{\text{max}}$  (ATR)/ $\text{cm}^{-1}$  3255, 2981, 2968, 2925, 1705, 1667, 1622, 1471, 1341, 1235, 1191; MS ESI  $m/z$  186.1  $[\text{M}+\text{H}]$  HRMS (ESI-TOF) Calculated for  $\text{C}_{12}\text{H}_{11}\text{NONa} = 208.0738$  Found = 208.0739; MP 112-114  $^{\circ}\text{C}$ .

### Synthesis of 1-benzyl-3-methyl-3-(prop-2-yn-1-yl)indolin-2-one (**1**)

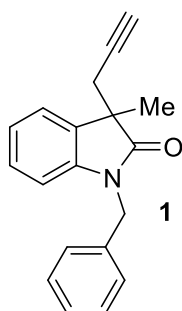

Sodium hydride (2.38 mmol, 0.082 g, 2.2 equiv) was suspended in THF (10 mL). The reaction was cooled to 0  $^{\circ}\text{C}$  using an ice bath, at this temperature a solution of 3-methyl-3-(prop-2-yn-1-yl)indolin-2-one (1.08 mmol, 0.20 g, 1 equiv) dissolved in THF (10 mL) was added dropwise. When the formation of gas had ceased, benzyl bromide (1.08 mmol, 0.185 g, 0.129 mL, 1 equiv)

was added to the mixture. The reaction was allowed to warm to room temperature and left to stir for 2 h. Water (5 mL) was added to decompose any remaining sodium hydride and the solution was extracted with water (50 mL) and diethyl ether (3 x 50 mL). The organic phase was dried over magnesium sulphate and concentrated *in vacuo*. To yield the product as a colourless crystalline solid this was then washed with hexane (50 mL) to remove any residual benzyl bromide. Colourless crystalline solid 0.23g, 77% yield.

$^1\text{H}$  NMR (300 MHz,  $\text{CDCl}_3$ )  $\delta$  7.43 (dd,  $J = 7.4, 0.8$  Hz, 1H), 7.36 – 7.28 (m, 5H), 7.18 (td,  $J = 7.7, 1.3$  Hz, 1H), 7.05 (td,  $J = 7.6, 1.0$  Hz, 1H), 6.73 (d,  $J = 7.8$  Hz, 1H), 4.96 (ABq,  $J = 15.7$  Hz, 2H), 2.72 (ABqd,  $J = 16.5, 2.7$  Hz, 2H), 1.92 (t,  $J = 2.6$  Hz, 1H), 1.51 (s, 3H);  $^{13}\text{C}$  NMR (101 MHz,  $\text{CDCl}_3$ )  $\delta$  179.46, 142.16, 135.84, 132.96, 128.70, 128.14, 127.59, 127.32, 123.21, 122.60, 109.12, 79.76, 70.77, 46.77, 43.76, 27.76, 22.36; IR  $\nu_{\text{max}}$  (ATR)/ $\text{cm}^{-1}$  3285, 2924, 1711, 1608, 1489, 1466, 1426, 1378, 1179; MS ESI  $m/z$  276.1  $[\text{M}+\text{H}]$  HRMS (ESI-TOF) Calculated for  $\text{C}_{19}\text{H}_{18}\text{NO} = 276.1388$  Found = 276.1378; MP 140-141 $^{\circ}\text{C}$ ; HPLC

(Cellulose 3) acetonitrile/water 50:50, 1.0 mL/min,  $\lambda = 254$  nm,  $t_{\text{major}} = 7.5$  min,  $t_{\text{minor}} = 8.5$  min;  $[\alpha]_D^{293} t_{\text{minor}} = -41$  ( $c = 1.0$ ,  $\text{CHCl}_3$ )°

Enantiopure material was recovered by preparative HPLC using cellulose 1 acetonitrile/water 50:50 15 mL/min,  $\lambda = 254$  nm. The enantiopure material was subjected to optical rotation analysis and from this it was calculated that the (–) enantiomer was eluting as the  $t_{\text{minor}}$  peak in the cellulose 3 analytical HPLC. Therefore the recovered enantioenriched alkyne from the kinetic resolution should have a positive optical rotation.

### Synthesis of 1-benzyl-3-((1-benzyl-1H-1,2,3-triazol-4-yl)methyl)-3-methylindolin-2-one (2a)

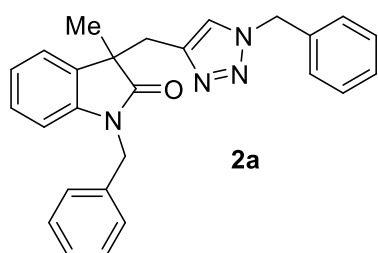

To a solution of **1** (0.24 mmol, 0.066 g, 1 equiv) in methanol (10 mL) was added copper (I) iodide (0.0046 g, 0.024 mmol, 10 mol%), sodium ascorbate (0.24 mmol, 0.048g, 1 equiv) and finally benzyl azide (0.24 mmol, 0.032 g, 1 equiv) this was allowed to stir overnight. The reaction was quenched with aqueous ammonia 5% v/v (10 mL) and extracted with diethyl ether (3 x 25 mL) then washed with water (100 mL). The remaining starting material and the triazolic product were isolated by combiflash chromatography. Rf petroleum ether: diethyl ether 0-100% gradient followed by EtOAc 100%. To yield the product as brown oil 0.070 g, 71% yield.

$^1\text{H}$  NMR (300 MHz,  $\text{CDCl}_3$ )  $\delta$  7.35 – 6.93 (m, 13 H), 6.73 (s, 1 H), 6.57 (d,  $J = 7.6$  Hz, 1H), 5.28 (s, 2 H), 4.70 (s, 2 H), 3.81 (ABq  $J = 14.3$ , 2H) 1.54 (s, 3 H);  $^{13}\text{C}$  NMR (101 MHz,  $\text{CDCl}_3$ )  $\delta$  179.88, 143.35, 142.11, 135.94, 134.87, 132.91, 128.95, 128.71, 128.44, 127.85, 127.69, 127.52, 127.28, 123.25, 122.58, 121.84, 108.82, 53.71, 48.58, 43.48, 34.39, 23.46; IR  $\nu_{\text{max}}$  (ATR)/ $\text{cm}^{-1}$  2924, 1708, 1611, 1489, 1468, 1454, 1355, 1176; MS ESI  $m/z$  431.3 [M+Na] HRMS (ESI-TOF) Calculated for  $\text{C}_{26}\text{H}_{24}\text{N}_4\text{ONa} = 431.1848$  Found = 431.1848;



HPLC (Cellulose 3) acetonitrile/water 40:60, 1.0 mL/min,  $\lambda = 254$  nm,  $t_{\text{major}} = 11.2$  min,  $t_{\text{minor}} = 12.7$  min.

## General procedure for synthesis of racemic oxindole triazoles via *in situ* azide formation

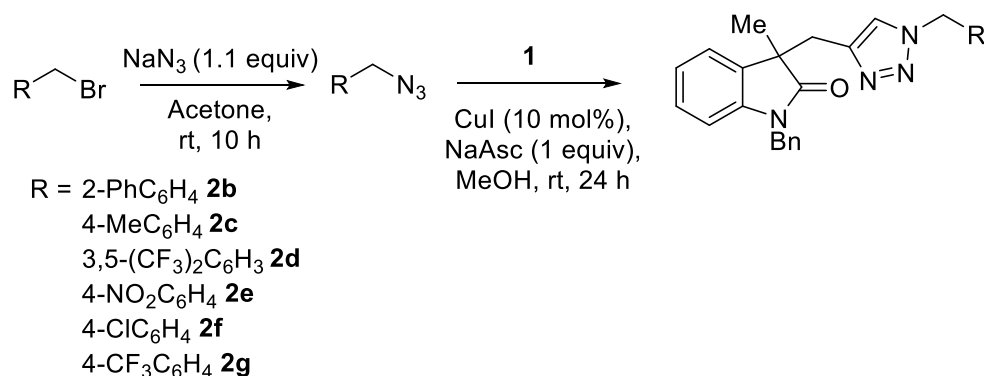

The alkyl bromide (0.12 mmol, 1 equiv) was stirred at rt with sodium azide (0.13 mmol, 0.0085 g, 1.1 equiv) in acetone (5 mL). After 10 hours the reaction was diluted with methanol (10 mL) and **1** (0.12 mmol, 0.033 g, 1 equiv) added along with copper (I) iodide (2.3 mg, 0.012 mmol, 0.1 equiv, 10 mol%) and sodium ascorbate (0.12 mmol, 0.024 g, 1 equiv) the reaction was allowed to stir at rt for 24 h. The reaction was quenched with aqueous ammonia 5% v/v (10 mL) and extracted with ether (3 x 25 mL). The triazolic product was isolated by combiflash Rf petroleum ether: diethyl ether 0-100% gradient followed by EtOAc 100%.

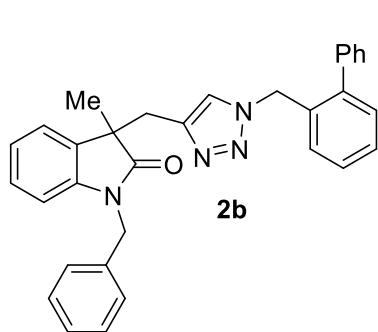

(**2b**) Brown oil 0.030 g, 52% yield  $^1\text{H}$  NMR (300 MHz,  $\text{CDCl}_3$ )  $\delta$  7.46 – 6.97 (m, 16H), 6.75 (d,  $J = 7.6$  Hz, 1H), 6.64 – 6.53 (m, 2H), 5.22 (s, 2H), 4.68 (q,  $J = 15.6$  Hz, 2H), 3.26 (ABq,  $J = 14.3$  Hz, 2H), 1.50 (s, 3H);  $^{13}\text{C}$  NMR (101 MHz,  $\text{CDCl}_3$ )  $\delta$  179.90, 143.04, 142.10, 141.68, 139.74,

135.89, 132.93, 132.27, 130.30, 128.99, 128.66, 128.54, 128.46, 128.30, 128.05, 127.85, 127.67, 127.49, 127.22, 123.31, 122.58, 121.95, 108.83, 51.35, 48.56, 43.48, 34.27, 23.57; IR

$\nu_{\max}$  (ATR)/ $\text{cm}^{-1}$  2925, 2854, 1707, 1611, 1488, 1467, 1453; MS ESI  $m/z$  507.2 [M+Na]

HRMS (ESI-TOF) Calculated for  $\text{C}_{32}\text{H}_{28}\text{N}_4\text{ONa}$  = 507.2161 Found = 507.2166.

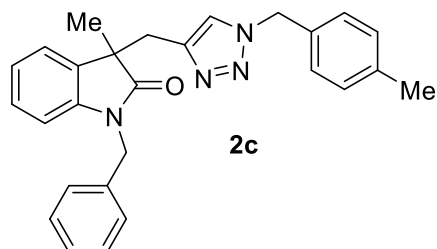

**2c**

**(2c)** Brown oil 0.038 g, 75% yield  $^1\text{H}$  NMR (300 MHz,  $\text{CDCl}_3$ )  $\delta$  7.28 – 6.93 (m, 10H), 6.85 (d,  $J$  = 8.0, 2H), 6.70 (s, 1H), 6.55 (d,  $J$  = 7.6, 1H), 5.21 (s, 2H), 4.68 (s, 2H), 3.26 (Abq,  $J$  = 14.3, 2H), 2.34 (s, 3H), 1.51 (s,

3H);  $^{13}\text{C}$  NMR (101 MHz,  $\text{CDCl}_3$ )  $\delta$  179.89, 143.23, 142.11, 138.30, 135.95, 132.94, 131.84, 129.60, 128.70, 127.82, 127.77, 127.51, 127.23, 123.26, 122.57, 121.76, 108.83, 53.53, 48.57, 43.48, 34.39, 23.43, 21.16; IR  $\nu_{\max}$  (ATR)/ $\text{cm}^{-1}$  2925, 1707, 1611, 1489, 1467, 1453, 1379, 1354, 1175; MS ESI  $m/z$  445.2 [M+Na] HRMS (ESI-TOF) Calculated for  $\text{C}_{27}\text{H}_{26}\text{N}_4\text{ONa}$  = 445.2004 Found = 445.2006.

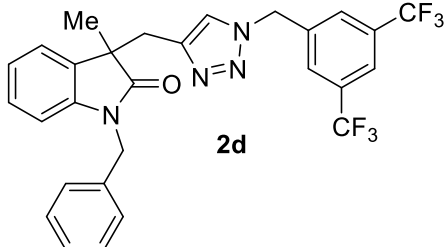

**2d**

**(2d)** Brown oil 0.035g, 53% yield  $^1\text{H}$  NMR (300 MHz,  $\text{CDCl}_3$ )  $\delta$  7.83 (s, 1H), 7.46 (s, 2H), 7.31 – 6.93 (m, 9H), 6.74 (s, 1H), 6.60 (d,  $J$  = 7.5 Hz, 1H), 5.32 (s, 2H), 4.76 (Abq,  $J$  = 15.5 Hz, 1H), 3.32 (Abq,  $J$  = 14.4 Hz, 2H),

1.52 (s, 3H);  $^{13}\text{C}$  NMR (101 MHz,  $\text{CDCl}_3$ )  $\delta$  179.77, 143.92, 142.06, 137.28, 135.97, 132.81, 132.61, 132.27, 128.68, 128.00, 127.88, 127.53, 127.43, 123.17, 122.66, 122.00, 108.77, 52.51, 48.37, 43.51, 34.22, 23.62;  $^{19}\text{F}$  NMR (282 MHz,  $\text{CDCl}_3$ )  $\delta$  -62.83; IR  $\nu_{\max}$  (ATR)/ $\text{cm}^{-1}$  2928, 1706, 1612, 1489, 1468, 1454, 1382, 1354, 1277, 1173, 1132; MS ESI  $m/z$  567.2 [M+Na] HRMS (ESI-TOF) Calculated for  $\text{C}_{28}\text{H}_{22}\text{N}_4\text{OF}_6\text{Na}$  = 567.1596 Found = 567.1593.

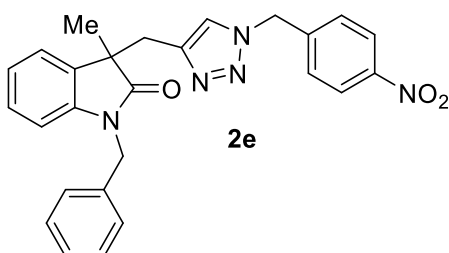

**2e**

**(2e)** Colourless solid 0.035g 64% yield  $^1\text{H}$  NMR (300 MHz,  $\text{CDCl}_3$ )  $\delta$  8.15 – 7.96 (m, 2H), 7.26 – 6.88 (m,

10H), 6.75 (s, 1H), 6.65 (d,  $J = 7.7$ , 1H), 5.35 (d,  $J = 6.3$ , 2H), 4.79 (Abq,  $J = 15.5$ , 2H), 3.36 (Abq,  $J = 14.4$ , 2H), 1.55 (3 H, s);  $^{13}\text{C}$  NMR (101 MHz,  $\text{CDCl}_3$ )  $\delta$  179.74, 143.90, 142.19, 141.85, 135.94, 132.90, 128.69, 127.96, 127.90, 127.55, 124.06, 123.22, 122.67, 122.15, 108.77, 52.60, 48.56, 43.70, 34.18, 23.81; IR  $\nu_{\text{max}}$  (ATR)/ $\text{cm}^{-1}$  2925, 1707, 1611, 1521, 1489, 1467, 1453, 1379, 1346, 1176; MS ESI  $m/z$  476.2  $[\text{M}+\text{Na}]$  HRMS (ESI-TOF) Calculated for  $\text{C}_{26}\text{H}_{23}\text{N}_5\text{O}_3\text{Na} = 476.1699$  Found = 476.1698.

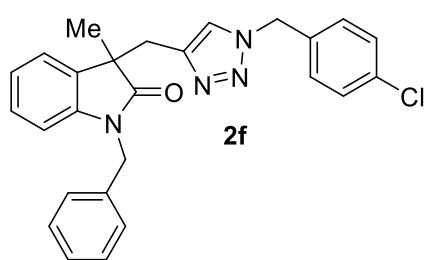

**(2f)** Brown oil 0.043 g, 82% yield  $^1\text{H}$  NMR (300 MHz,  $\text{CDCl}_3$ )  $\delta$  7.27 – 6.94 (m, 10H), 6.78 (t,  $J = 9.7$  Hz, 2H), 6.65 (s, 1H), 6.56 (d,  $J = 7.7$  Hz, 1H), 5.27 – 5.12 (m, 2H), 4.70 (Abq,  $J = 15.6$  Hz, 2H), 3.29 (Abq,  $J = 14.3$  Hz, 2H)

1.52 (s, 3H);  $^{13}\text{C}$  NMR (101 MHz,  $\text{CDCl}_3$ )  $\delta$  179.80, 143.54, 142.13, 135.92, 134.41, 133.32, 132.89, 129.11, 128.97, 128.71, 127.86, 127.55, 127.37, 123.20, 122.60, 121.79, 108.81, 52.93, 48.57, 43.56, 34.34, 23.57; IR  $\nu_{\text{max}}$  (ATR)/ $\text{cm}^{-1}$  2925, 1707, 1611, 1490, 1467, 1454, 1380, 1355, 1174; MS ESI  $m/z$  465.2  $[\text{M}+\text{Na}]$  HRMS (ESI-TOF) Calculated for  $\text{C}_{27}\text{H}_{23}\text{N}_4\text{OF}_3\text{Na} = 465.1458$  Found = 465.1453.

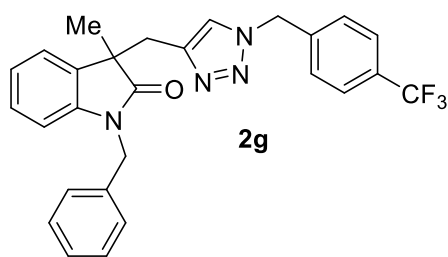

**(2g)** Brown oil 0.036 g, 63% yield  $^1\text{H}$  NMR (300 MHz,  $\text{CDCl}_3$ )  $\delta$  7.49 (d,  $J = 8.1$  Hz, 2H), 7.28 – 6.89 (m, 10H), 6.67 (s, 1H), 6.57 (d,  $J = 7.6$  Hz, 1H), 5.36 – 5.21 (m, 2H), 4.72 (Abq,  $J = 15.5$  Hz, 2H), 3.31 (Abq,  $J = 14.3$  Hz, 2H), 1.53 (s, 3H);  $^{13}\text{C}$  NMR (101 MHz,  $\text{CDCl}_3$ )  $\delta$  179.77, 143.68, 142.16, 138.75, 135.92, 132.88, 130.47, 128.70, 127.88, 127.73, 127.56, 127.42, 125.88, 125.85, 123.19, 122.60, 121.96, 108.77, 52.97, 48.56, 43.61, 34.28, 23.67;  $^{19}\text{F}$  NMR (282 MHz,  $\text{CDCl}_3$ )  $\delta$  -62.69; IR  $\nu_{\text{max}}$  (ATR)/ $\text{cm}^{-1}$  2925, 1709, 1612, 1490, 1468, 1381, 1326, 1169, 1124;

$^{19}\text{F}$  NMR (282 MHz,  $\text{CDCl}_3$ )  $\delta$  -62.69; IR  $\nu_{\text{max}}$  (ATR)/ $\text{cm}^{-1}$  2925, 1709, 1612, 1490, 1468, 1381, 1326, 1169, 1124;

MS ESI  $m/z$  499.2 [M+Na] HRMS [M+Na] Calculated for  $C_{27}H_{23}N_4OF_3Na$  = 499.1722  
Found = 499.1721.

### General procedure for synthesis and isolation of azides

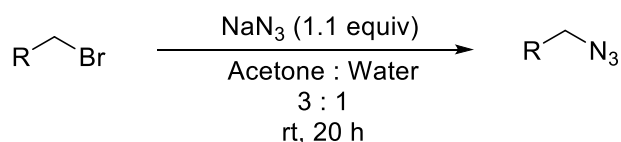

Sodium azide (1.20 g, 18.5 mmol, 1.1 equiv) was added to a mixture of acetone : water (3:1), to this benzyl bromide was added (2.88 g, 16.8 mmol, 2 mL, 1 equiv) and the reaction mixture was stirred at rt for 20 h. Water (100 mL) was added and the reaction mixture was extracted with diethyl ether (3 x 25 mL). The combined organic extracts were combined and removed *in vacuo* to yield benzyl azide **3a** as a colourless oil 1.79 g 80% yield

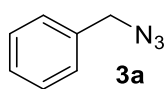

Characterisation was in agreement with the reported literature values.<sup>1</sup>  $^1\text{H}$  NMR (300 MHz,  $\text{CDCl}_3$ )  $\delta$  7.35 – 7.18 (m, 5H), 4.18 (s, 2H);  $^{13}\text{C}$  NMR (101 MHz,  $\text{CDCl}_3$ )  $\delta$  135.65, 128.98, 128.43, 128.38, 54.83; MS EI  $m/z$  133.1 [M], 104 [M-N<sub>2</sub>], 91.1 [M-N<sub>3</sub>], 77.0 [M-CH<sub>2</sub>N<sub>3</sub>].

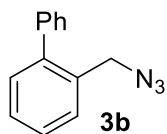

Prepared from 2-phenylbenzyl bromide (0.50 g, 2.39 mmol, 1 equiv) and sodium azide (0.17 g, 2.63 mmol, 1.1 equiv) according to the general procedure. Isolated as a yellow oil 0.42 g, 85% yield. Characterisation was consistent with the literature.<sup>2</sup>  $^1\text{H}$  NMR (300 MHz,  $\text{CDCl}_3$ )  $\delta$  7.44 – 7.25 (m, 9H), 4.24 (s, 2H);  $^{13}\text{C}$  NMR (101 MHz,  $\text{CDCl}_3$ )  $\delta$  142.33, 140.37, 132.92, 130.56, 129.69, 129.31, 128.45, 127.91, 127.57, 52.68.

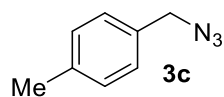

Prepared from 4-methylbenzyl bromide (0.5 g, 2.70 mmol, 1 equiv) and sodium azide (0.19 g, 3.00 mmol, 1.1 equiv) according to the general procedure. Isolated as an orange oil 0.40 g, 64% yield. Characterisation was consistent with the literature.<sup>3</sup> <sup>1</sup>H NMR (300 MHz, CDCl<sub>3</sub>) δ 7.21 – 7.13 (m, 4H), 4.25 (s, 2H), 2.33 (s, 3H); <sup>13</sup>C NMR (101 MHz, CDCl<sub>3</sub>) δ 138.18, 132.39, 129.56, 128.33, 54.65, 21.20. MS EI m/z 147.1 [M], 118.1 [M-N<sub>2</sub>], 105.1 [M-N<sub>3</sub>], 91.1 [M-CH<sub>2</sub>N<sub>3</sub>].

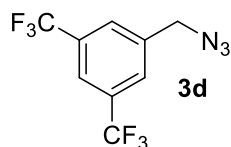

Prepared from 3,5-bis(trifluoromethyl)benzyl bromide (0.20 g, 0.65 mmol, 1 equiv) and sodium azide (0.05 g, 0.72 mmol, 1.1 equiv) according to the general procedure. Isolated as a yellow oil 0.096 g, 55% yield. Characterisation was consistent with the literature.<sup>3</sup> <sup>1</sup>H NMR (300 MHz, CDCl<sub>3</sub>) δ 7.86 (s, 1H), 7.79 (s, 2H), 4.56 (s, 2H); <sup>13</sup>C NMR (101 MHz, CDCl<sub>3</sub>) δ 138.30, 132.63, 132.29, 131.96, 131.63, 127.86, 127.83, 127.13, 124.42, 122.06, 122.03, 121.99, 121.71, 53.44.

## General procedure for oxindole kinetic resolution screening

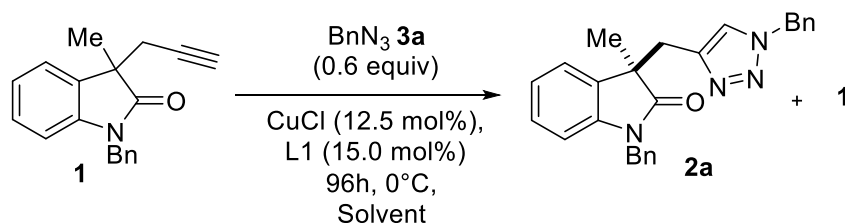

To an oven dried Radleys multi reactor tube, under an atmosphere of nitrogen, were added **L1** (0.0067 g, 0.018 mmol, 15.0 mol%) and CuCl (0.0015 g, 0.015 mmol, 12.5 mol%) followed by 2,5-hexanedione (1 mL). After the solution was stirred at rt for 1 h, compound **1** (0.033 g, 0.12 mmol, 1 equiv) dissolved in 2,5-hexanedione (1 mL) was added. The reaction mixture was stirred for a further 15 mins at rt then cooled to 0 °C for another 15 mins, benzyl azide (0.0095 g, 0.07 mmol, 0.6 equiv) was then added. The resulting mixture was maintained at 0 °C for 96 h with stirring. The reaction was quenched with aqueous ammonia 5% v/v (10 mL) and extracted with diethyl ether (2 x 25mL) dried over MgSO<sub>4</sub> and

concentrated *in vacuo*. A crude  $^1\text{H}$  NMR spectrum was taken to determine conversion. The remaining starting material and the triazolic product were then isolated by automated column chromatography combiflash Rf petroleum ether: diethyl ether 0-100% gradient followed by EtOAc 100%. Conversion was measured by  $^1\text{H}$  NMR and enantiomeric excess via chiral HPLC.

### Representative procedure for oxindole kinetic resolution screening using *in situ* azide formation

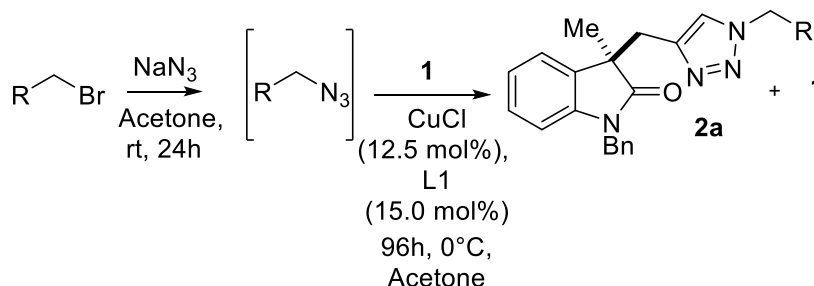

4-Nitrobenzyl bromide (0.015 g, 0.07 mmol, 0.6 equiv) was stirred at rt with sodium azide (0.0052 g, 0.08 mmol, 1.1 equiv) in acetone (5 mL) for 10 h. In a separate reaction vessel a solution of **L1** (0.0067 g, 0.018 mmol, 15.0 mol%) and CuCl (0.0015 g, 0.015 mmol, 12.5 mol%) in acetone (1mL) was stirred for 1 h at rt. To this **1** (0.033 g, 0.12 mmol, 1 equiv) in acetone (1 mL) was added. The reaction was then cooled to 0°C and stirred for 30 minutes the azide formation solution was then transferred by syringe this was then maintained at 0°C for 96 h. The reaction was quenched with aqueous ammonia 5% v/v (10 mL) and extracted with diethyl ether (2 x 25 mL). The remaining starting material and the triazolic product were isolated by combiflash Rf petroleum ether: diethyl ether 0-100% gradient followed by EtOAc 100% and enantiomeric excess determined by chiral HPLC.

### In situ azide screening table

| Entry | R                                           | Conv (%) <sup>a</sup> | ee SM (%) <sup>b</sup> | Selectivity Factor (S) <sup>c</sup> |
|-------|---------------------------------------------|-----------------------|------------------------|-------------------------------------|
| 1     | <b>2b</b> 2-PhC <sub>6</sub> H <sub>4</sub> | 13                    | 14                     | 35.2                                |

|   |                                                             |    |   |     |
|---|-------------------------------------------------------------|----|---|-----|
| 2 | <b>2c</b> 4-MeC <sub>6</sub> H <sub>4</sub>                 | 12 | 8 | 4.2 |
| 3 | <b>2d</b> 3,5-CF <sub>3</sub> C <sub>6</sub> H <sub>3</sub> | 12 | 7 | 3.3 |
| 4 | <b>2e</b> 4-NO <sub>2</sub> C <sub>6</sub> H <sub>4</sub>   | 22 | 6 | 1.6 |
| 5 | <b>2f</b> 4-ClC <sub>6</sub> H <sub>4</sub>                 | 12 | 6 | 2.7 |
| 6 | <b>2g</b> 4-CF <sub>3</sub> C <sub>6</sub> H <sub>4</sub>   | 6  | 0 | 1   |

<sup>a</sup> Conversion determined by inspection of <sup>1</sup>H NMR spectra (see ESI); <sup>b</sup> E.e. of recovered starting material (HPLC); <sup>c</sup>  $S = \ln[(1-c)(1-ee)]/\ln[(1-c)(1+ee)]$ .

## Representative determination of conversion via <sup>1</sup>H NMR Spectroscopy

Conversion of alkyne **1** to triazole **2a** was determined by direct comparison of the integrations of a series of peaks in the crude <sup>1</sup>H NMR spectra of the resolution reaction mixture. Due to the high boiling point of 2,5-hexanedione it was only possible to remove this *via* column chromatography therefore HPLC was not an appropriate manner for conversion analysis. The signals in the benzylic region were used as this was a clear area away from any interference from remaining solvent. The ABq centred at 4.96 of compound **1** was directly compared with the two singlets at 5.28 and 4.70 of compound **2a**. A representative example is shown in Figure 1. When the azide was varied the analogous signals in the triazolic product were used.

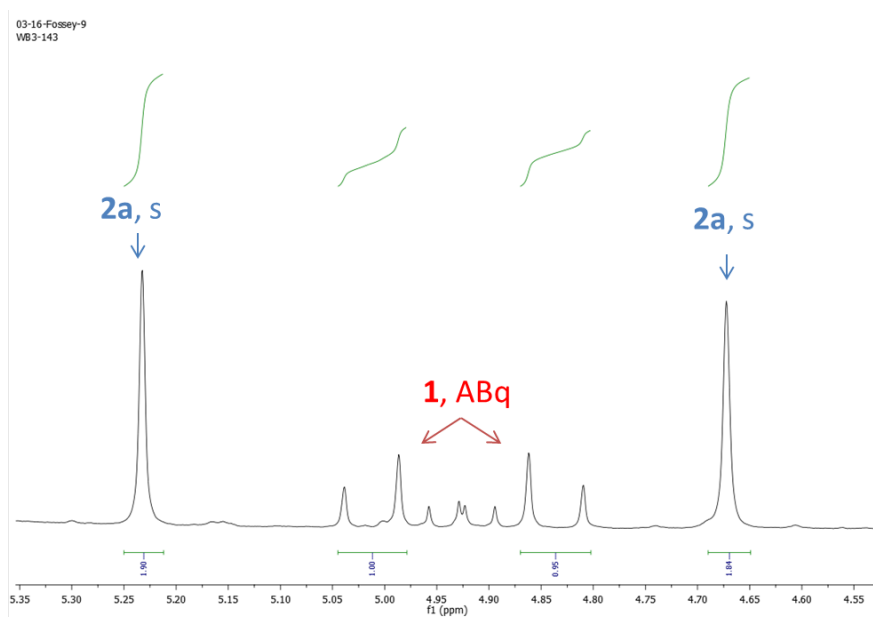

$$\text{Integration per proton in } \mathbf{1} = \frac{1.00+0.95}{2} = 0.98 \quad \text{Integration per proton in } \mathbf{2a} = \frac{1.90+1.84}{4} = 0.94$$

$$\% \text{ Conversion} = \frac{0.94}{0.94+0.98} \times 100 = 49\%$$

Figure 1 Crude  $^1\text{H}$  NMR showing direct comparison of signals related to product and starting material for calculation of conversion



## Screening Tables

### Solvents

| Entry | Solvent                                               | Conv<br>(%) <sup>a</sup> | ee SM<br>(%) <sup>b</sup> | Selectivity Factor ( <i>S</i> ) <sup>c</sup> |
|-------|-------------------------------------------------------|--------------------------|---------------------------|----------------------------------------------|
| 1     | 2,5-Hexanedione                                       | 46                       | 72                        | 23.2 <sup>d</sup>                            |
| 2     | Acetone                                               | 34                       | 35                        | 5.3                                          |
| 3     | Acetonitrile                                          | 14                       | 1                         | 1.1                                          |
| 4     | DMF                                                   | 0                        | -                         | -                                            |
| 5     | DMSO                                                  | 44                       | 18                        | 1.9                                          |
| 6     | 1,4-Dioxane                                           | 17                       | 6                         | 1.9                                          |
| 7     | <sup>t</sup> BuOH                                     | 19                       | 0                         | 1.0                                          |
| 8     | <sup>t</sup> BuOH/H <sub>2</sub> O                    | 13                       | 0                         | 1.0                                          |
| 9     | H <sub>2</sub> O                                      | 6                        | -                         | -                                            |
| 10    | Toluene                                               | 5                        | -                         | -                                            |
| 11    | 2-Butanone                                            | 0                        | -                         | -                                            |
| 12    | THF                                                   | 37                       | 46                        | 8.7                                          |
| 13    | 1:10 Acetone:2,5-Hexanedione                          | 61                       | 56                        | 3.5                                          |
| 14    | NMP                                                   | 4                        | -                         | -                                            |
| 15    | Cyclohexanone                                         | 0                        | -                         | -                                            |
| 16    | 2,3-Butandione                                        | 34                       | 18                        | 1.1                                          |
| 17    | Furan                                                 | 3                        | 1                         | 2.0                                          |
| 18    | <sup>t</sup> BuOH:2,5 Hexanedione 100:1, 25°C, 7 days | 63                       | 28                        | 1.8                                          |
| 19    | THF:2,5 Hexanedione 100:1                             | 23                       | 12                        | 2.6                                          |
| 20    | THF:2,5 Hexanedione 1:1                               | 30                       | 15                        | 2.4                                          |
| 21    | <sup>t</sup> BuOH                                     | 34                       | 7                         | 1.4                                          |

<sup>a</sup> Conversion determined by inspection of <sup>1</sup>H NMR spectra (see ESI); <sup>b</sup> E.e. of recovered starting material (HPLC); <sup>c</sup>  $S = \ln[(1-c)(1-ee)]/\ln[(1-c)(1+ee)]$ ; <sup>d</sup> Average of three  $S = 22.1 \pm 0.5$ , best unique case  $S = 23.2$ .

## Copper Sources

| Entry | Copper Source             | Conv (%) <sup>a</sup> | ee SM (%) <sup>b</sup> | Selectivity Factor (S) <sup>c</sup> |
|-------|---------------------------|-----------------------|------------------------|-------------------------------------|
| 1     | CuCl                      | 34                    | 35                     | 5.3                                 |
| 2     | CuBr                      | 14                    | 8                      | 3.2                                 |
| 3     | CuI                       | 51                    | 26                     | 2.1                                 |
| 4     | CuSO <sub>4</sub> , NaAsc | 13                    | 1                      | 1.2                                 |
| 5     | Cu(OTf) <sub>2</sub>      | 0                     | 0                      | -                                   |
| 6     | Cu(OTf).0.5Toluene        | 10                    | 3                      | 1.8                                 |
| 7     | Cu(OAc)                   | 0                     | 0                      | -                                   |
| 8     | Cu Metal                  | 0                     | 0                      | -                                   |
| 9     | Cu(OAc) <sub>2</sub>      | 8                     | 4                      | 2.8                                 |

<sup>a</sup> Conversion determined by inspection of <sup>1</sup>H NMR spectra (see ESI); <sup>b</sup> E.e. of recovered starting material (HPLC); <sup>c</sup>  $S = \ln[(1-c)(1-ee)]/\ln[(1-c)(1+ee)]$ .

## Temperature and additives

| Entry | Solvent         | Additive | Copper Source        | Temp (°C) | Reaction Time (h) | Conv (%) <sup>a</sup> | ee SM (%) <sup>b</sup> | S <sup>c</sup> |
|-------|-----------------|----------|----------------------|-----------|-------------------|-----------------------|------------------------|----------------|
| 1     | THF             |          | CuCl                 | 50        | 24                | 45                    | 8                      | 1.3            |
| 2     | Acetone         |          | CuCl                 | 50        | 24                | 46                    | 24                     | 2.3            |
| 3     | tBuOH           |          | CuCl                 | 50        | 24                | 7                     | 0                      | 1.0            |
| 4     | Acetone         |          | Cu(OTf).0.5Toluene   | 50        | 24                | 51                    | 11                     | 1.4            |
| 5     | Acetone         |          | Cu(OAc) <sub>2</sub> | 50        | 24                | 61                    | 20                     | 1.5            |
| 6     | Acetone         | NaAsc    | Cu(OTf).0.5Toluene   | 50        | 24                | 50                    | 1                      | 1.0            |
| 7     | Acetone         | NaAsc    | Cu(OAc) <sub>2</sub> | 50        | 24                | 53                    | 16                     | 1.5            |
| 8     | DMSO            |          | CuCl                 | 50        | 24                | 38                    | 4                      | 1.2            |
| 9     | DMF             |          | CuCl                 | 50        | 24                | 40                    | 8                      | 1.4            |
| 10    | 2,5-Hexanedione | NaAsc    | CuCl                 | 0         | 96                | 52                    | 21                     | 1.8            |
| 11    | THF             | NaAsc    | CuCl                 | 0         | 96                | 16                    | 1                      | 1.1            |
| 12    | THF             | DIPEA    | CuCl                 | 0         | 96                | 28                    | 27                     | 7.2            |
| 13    | Acetone         | DIPEA    | CuCl                 | 0         | 96                | 20                    | 16                     | 5.3            |

<sup>a</sup> Conversion determined by inspection of <sup>1</sup>H NMR spectra (see ESI); <sup>b</sup> E.e. of recovered starting material (HPLC); <sup>c</sup>  $S = \ln[(1-c)(1-ee)]/\ln[(1-c)(1+ee)]$ .

## Ligands

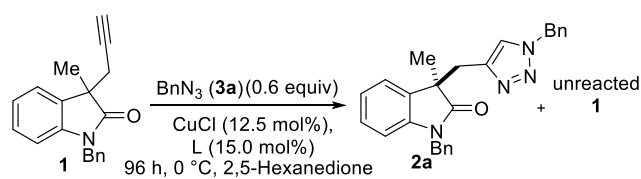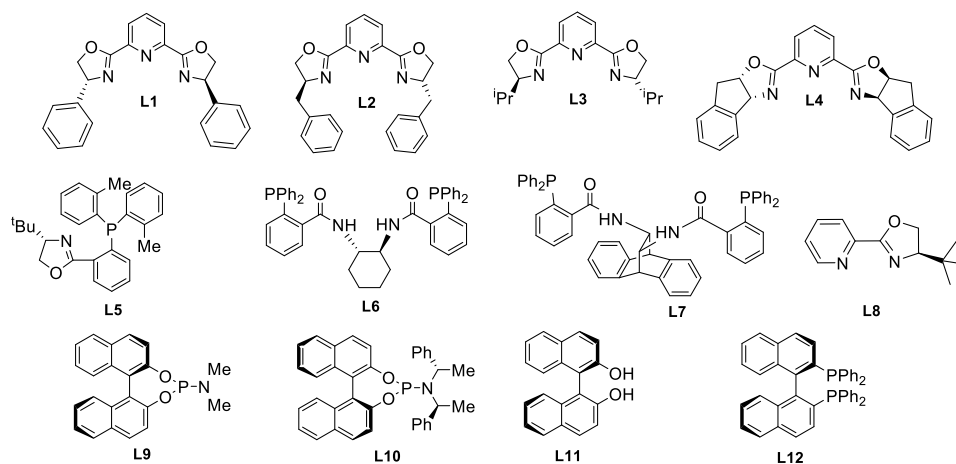

| Entry | Ligand | Conv (%) <sup>a</sup> | ee SM (%) <sup>b</sup> | Selectivity Factor ( <i>S</i> ) <sup>c</sup> |
|-------|--------|-----------------------|------------------------|----------------------------------------------|
| 1     | L1     | 46                    | 72                     | 23.2                                         |
| 2     | L2     | 6                     | 1                      | 1.4                                          |
| 3     | L3     | 0                     | -                      | -                                            |
| 4     | L4     | 0                     | -                      | -                                            |
| 5     | L5     | 0                     | -                      | -                                            |
| 6     | L6     | 0                     | -                      | -                                            |
| 7     | L7     | 0                     | -                      | -                                            |
| 8     | L8     | 5                     | 1                      | 1.5                                          |
| 9     | L9     | 0                     | -                      | -                                            |
| 10    | L10    | 0                     | -                      | -                                            |
| 11    | L11    | 4                     | 0                      | 1.0                                          |
| 12    | L12    | 0                     | -                      | -                                            |

<sup>a</sup> Conversion determined by inspection of  $^1\text{H}$  NMR spectra (see ESI); <sup>b</sup> E.e. of recovered starting material (HPLC); <sup>c</sup>  $S = \ln[(1-c)(1-ee)]/\ln[(1-c)(1+ee)]$ .

## NMR Data

# <sup>1</sup>H NMR 3-methyl-3-(prop-2-yn-1-yl)indolin-2-one

WB-NH-SM

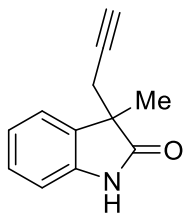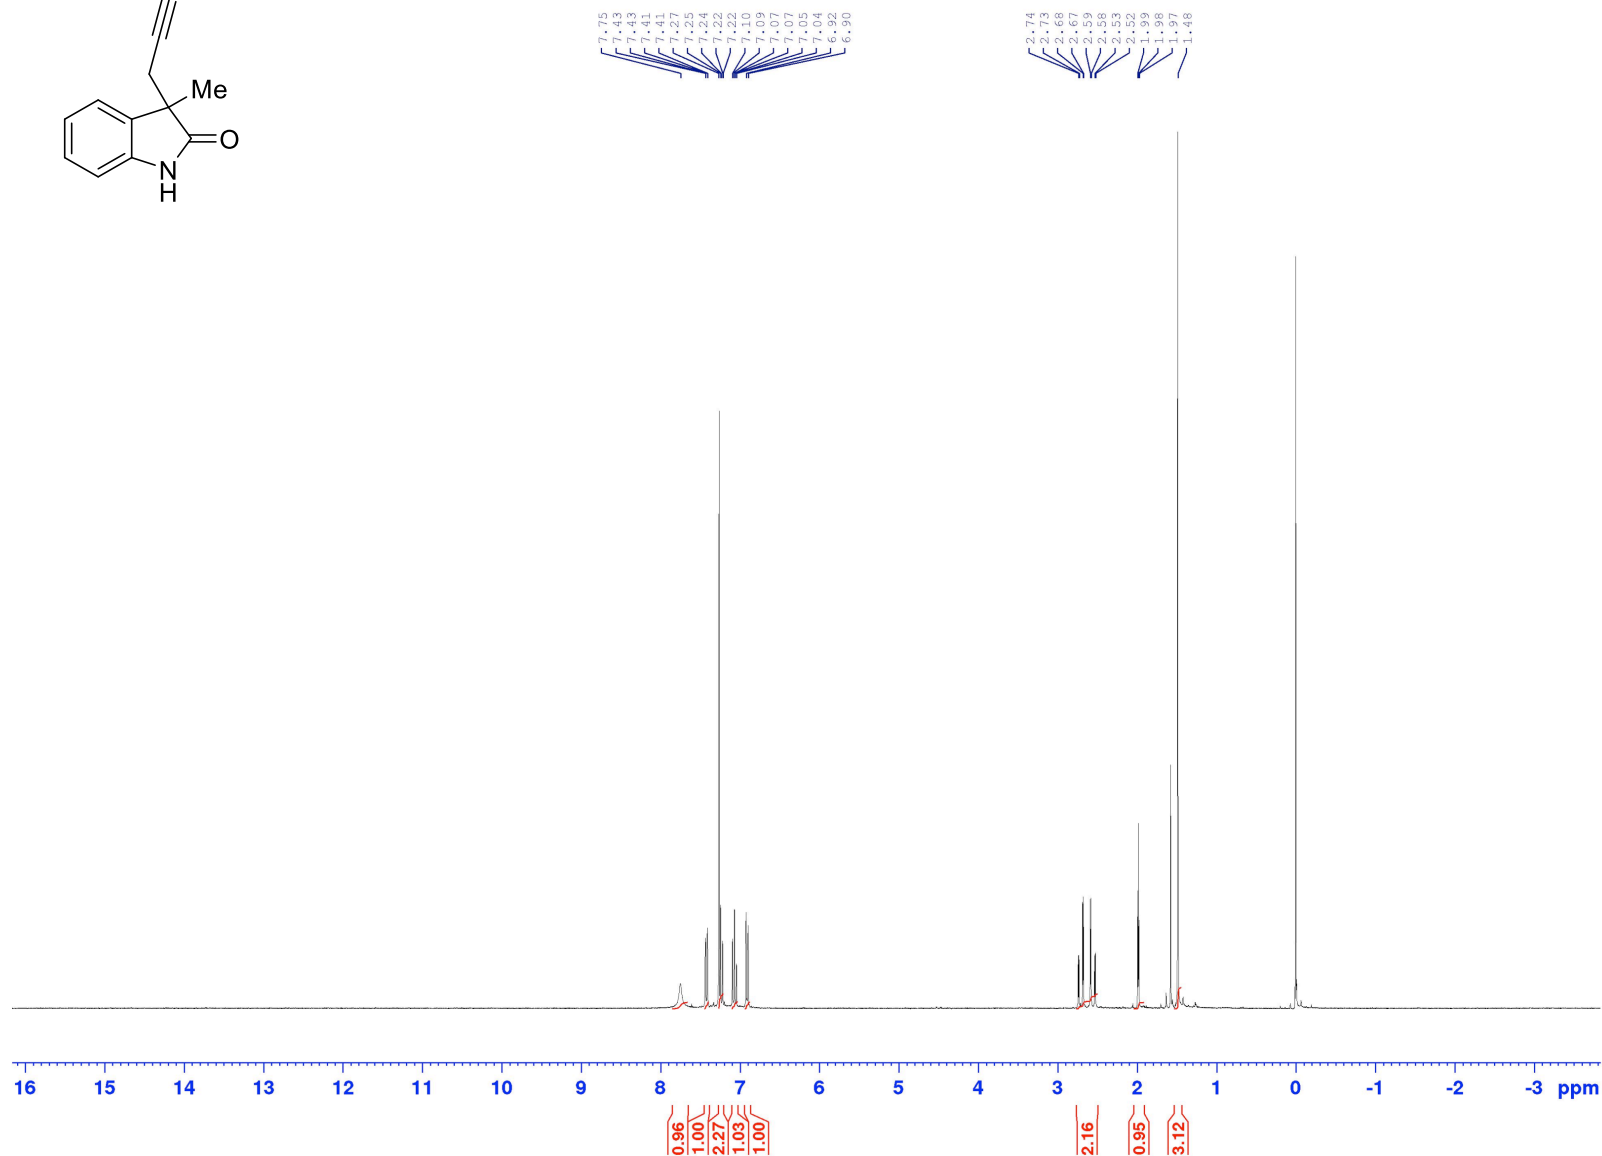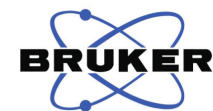

Current Data Parameters  
NAME 01-19-Fossey-13  
EXPNO 10  
PROCNO 1

F2 - Acquisition Parameters  
Date\_ 20150119  
Time 11.06  
INSTRUM spect  
PROBHD 5 mm PABBO BB-  
PULPROG zg30  
TD 32768  
SOLVENT CDCl3  
NS 32  
DS 2  
SWH 6009.615 Hz  
FIDRES 0.183399 Hz  
AQ 2.7262976 sec  
RG 645  
DW 83.200 use  
DE 12.89 use  
TE 292.9 K  
D1 1.00000000 sec  
TD0 1

===== CHANNEL f1 =====  
SF01 300.1318534 MHz  
NUC1 1H  
P1 12.80 use  
PLW1 9.57730007 W

F2 - Processing parameters  
SI 32768  
SF 300.1300068 MHz  
WDW EM  
SSB 0  
LB 0.30 Hz  
GB 0  
PC 1.00

# <sup>13</sup>C NMR 3-methyl-3-(prop-2-yn-1-yl)indolin-2-one

WBNH

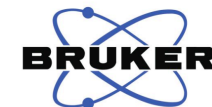

Current Data Parameters  
NAME 05-06-Fossey-14  
EXPNO 10  
PROCNO 1

F2 - Acquisition Parameters  
Date\_ 20150506  
Time 23.11  
INSTRUM spect  
PROBHD 5 mm PADUL 13C  
PULPROG udeft  
TD 18178  
SOLVENT CDCl3  
NS 380  
DS 0  
SWH 25252.525 Hz  
FIDRES 1.389181 Hz  
AQ 0.3599244 sec  
RG 2050  
DW 19.800 use  
DE 8.20 use  
TE 293.1 K  
D1 3.00000000 sec  
D11 0.03000000 sec  
D12 0.00002000 sec  
D20 200.00000000 sec  
TD0 380

===== CHANNEL f1 =====  
SFO1 100.6242690 MHz  
NUC1 13C  
P1 8.80 use  
P13 2000.00 use  
P26 500.00 use  
PLW1 58.63899994 W  
SPNAM[5] Crp60comp.4  
SPOAL5 0.500  
SPOFFS5 0 Hz  
SPW5 6.93809986 W  
SPNAM[8] Crp60,0.5,20.1  
SPOAL8 0.500  
SPOFFS8 0 Hz  
SPW8 6.93809986 W

===== CHANNEL f2 =====  
SFO2 400.1320000 MHz  
NUC2 1H  
CPDPRG[2] waltz16  
PCPD2 90.00 use  
PLW2 24.29199982 W  
PLW12 0.28218001 W

F2 - Processing parameters  
SI 65536  
SF 100.6127690 MHz  
WDW EM  
SSB 0  
LB 2.00 Hz  
GB 0  
PC 1.00

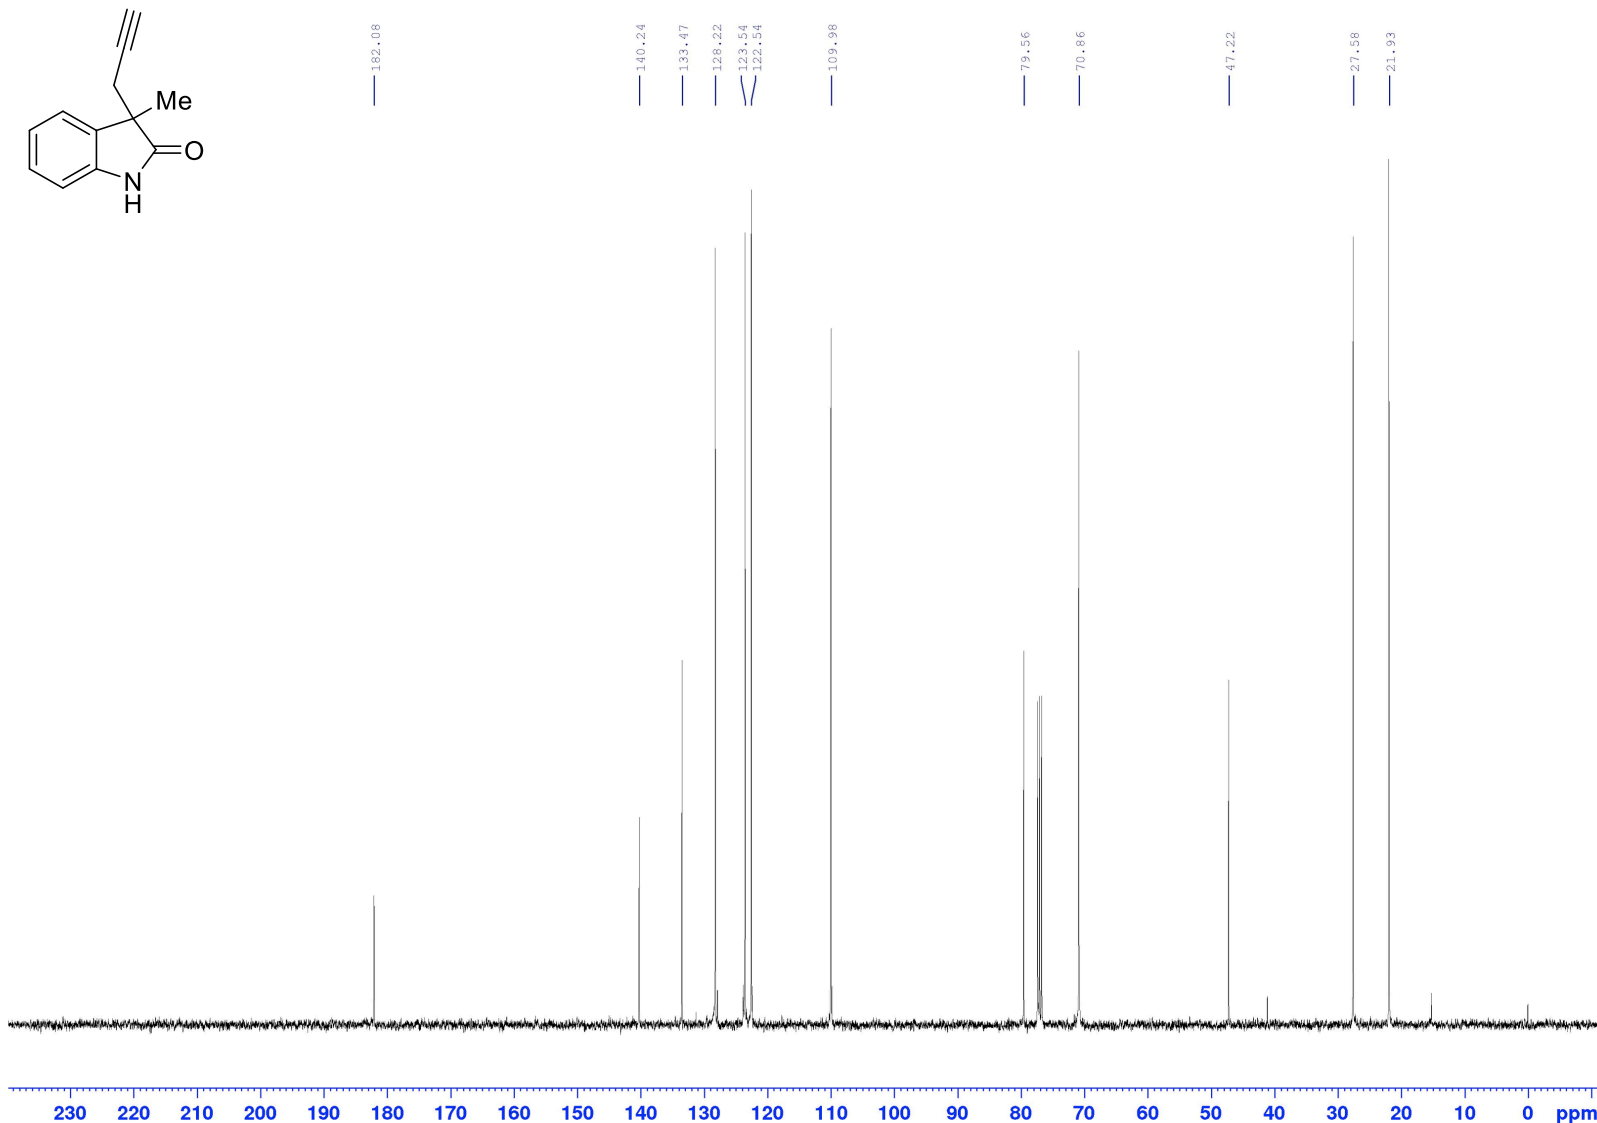

# <sup>1</sup>H NMR (1)

WB2-86 0mol%

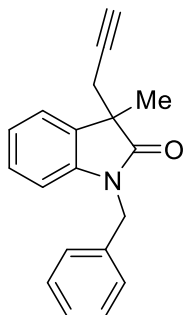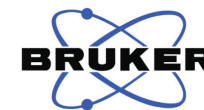

Current Data Parameters  
NAME 09-02-Fossey-57  
EXPNO 10  
PROCNO 1

F2 - Acquisition Parameters  
Date\_ 20140902  
Time 17.57  
INSTRUM spect  
PROBHD 5 mm PABBO BB-  
PULPROG zg30  
TD 32768  
SOLVENT CDCl3  
NS 32  
DS 2  
SWH 6009.615 Hz  
FIDRES 0.183399 Hz  
AQ 2.7262976 sec  
RG 228  
DW 83.200 use  
DE 12.89 use  
TE 294.2 K  
D1 1.00000000 sec  
TD0 1

===== CHANNEL f1 =====  
SFO1 300.1318534 MHz  
NUC1 1H  
P1 12.80 use  
PLW1 9.57730007 W

F2 - Processing parameters  
SI 32768  
SF 300.1300101 MHz  
WDW EM  
SSB 0  
LB 0.30 Hz  
GB 0  
PC 1.00

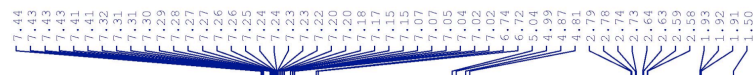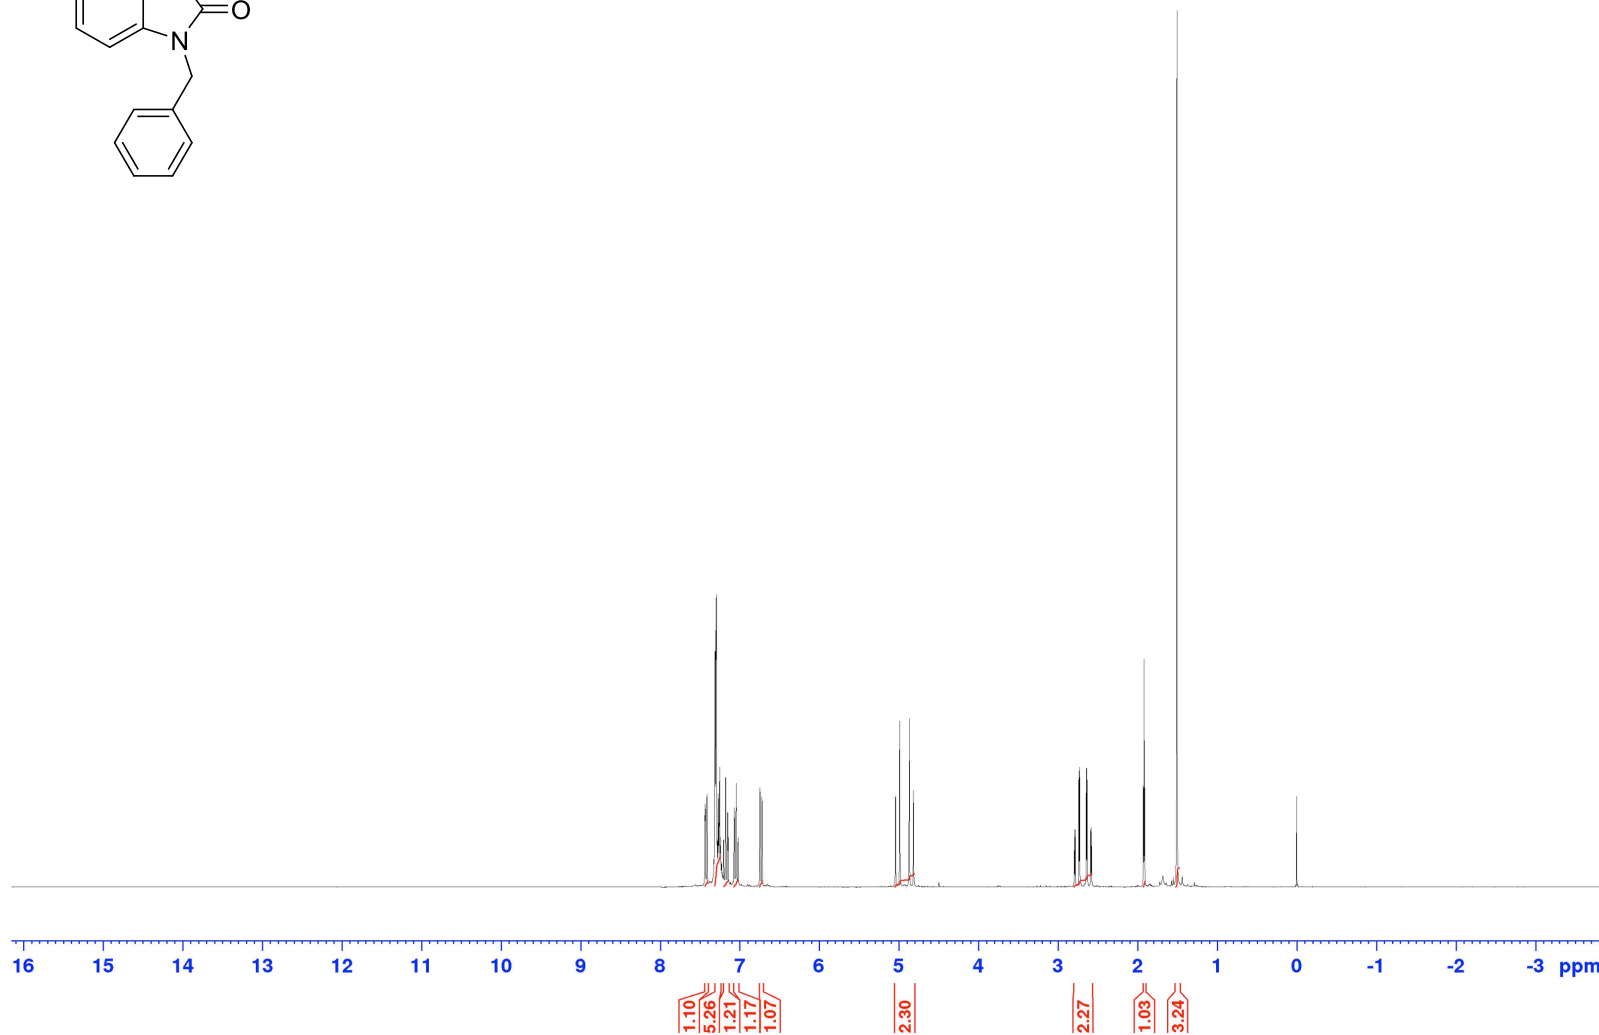

# <sup>13</sup>C NMR (1)

WBNBn

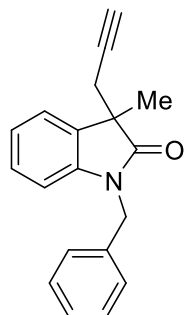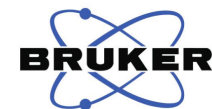

Current Data Parameters  
NAME 02-17-Fossey-12  
EXPNO 10  
PROCNO 1

F2 - Acquisition Parameters  
Date\_ 20150218  
Time 1.47  
INSTRUM spect  
PROBHD 5 mm PADUL 13C  
PULPROG udeflt  
TD 18178  
SOLVENT CDCl3  
NS 380  
DS 0  
SWH 25252.525 Hz  
FIDRES 1.389181 Hz  
AQ 0.3599244 sec  
RG 2050  
DW 19.800 use  
DE 8.20 use  
TE 293.4 K  
D1 3.00000000 sec  
D11 0.03000000 sec  
D12 0.00002000 sec  
D20 200.00000000 sec  
TD0 380

===== CHANNEL f1 =====  
SFO1 100.6242690 MHz  
NUC1 13C  
P1 8.80 use  
P13 2000.00 use  
P26 500.00 use  
PLW1 58.63899994 W  
SPNAM[5] Crp60comp.4  
SPOAL5 0.500  
SPOFFS5 0 Hz  
SPW5 6.93809986 W  
SPNAM[8] Crp60,0.5,20.1  
SPOAL8 0.500  
SPOFFS8 0 Hz  
SPW8 6.93809986 W

===== CHANNEL f2 =====  
SFO2 400.1320000 MHz  
NUC2 1H  
CPDPRG[2] waltz16  
PCPD2 90.00 use  
PLW2 24.29199982 W  
PLW12 0.28218001 W

F2 - Processing parameters  
SI 65536  
SF 100.6127690 MHz  
WDW EM  
SSB 0  
LB 2.00 Hz  
GB 0  
PC 1.00

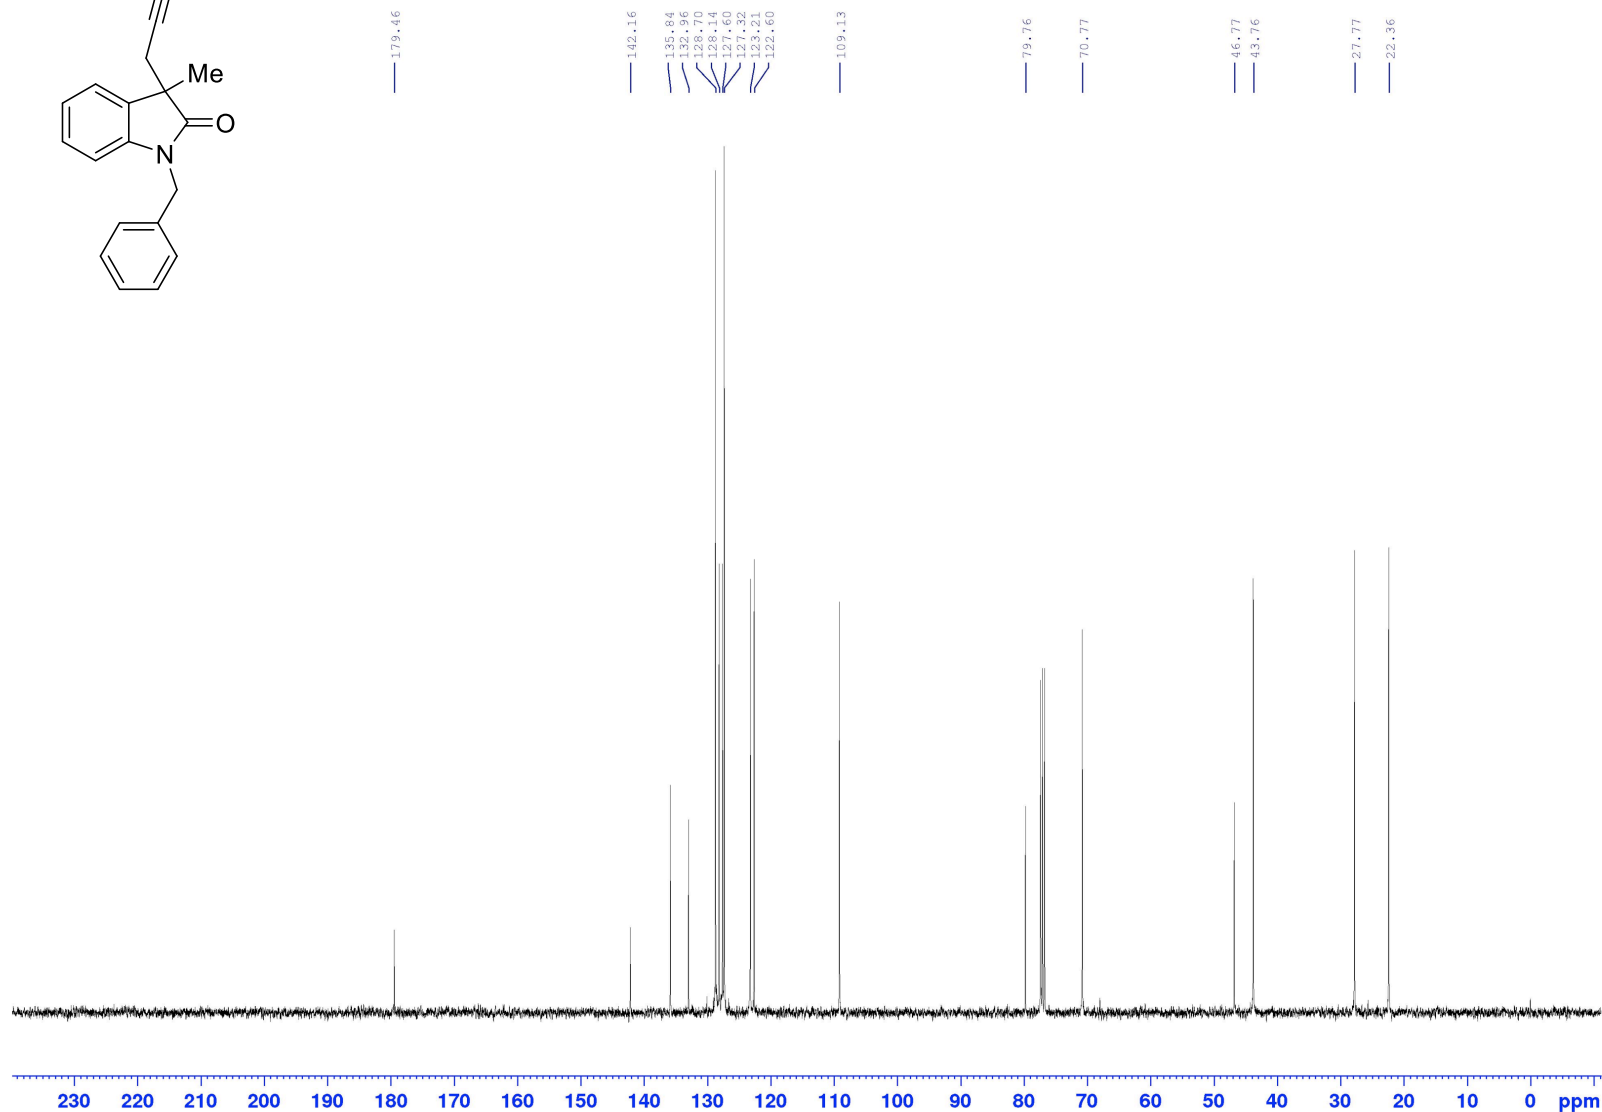



# <sup>1</sup>H NMR (2a)

WB3-79

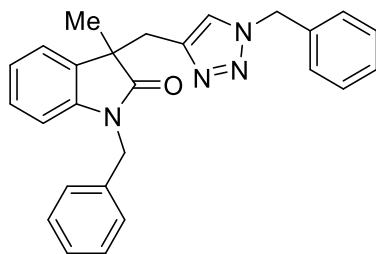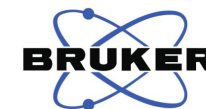

Current Data Parameters  
NAME 01-29-Fossey-5  
EXPNO 20  
PROCNO 1

F2 - Acquisition Parameters  
Date\_ 20150129  
Time 18.24  
INSTRUM spect  
PROBHD 5 mm PABBO BB-  
PULPROG zg30  
TD 32768  
SOLVENT CDCl3  
NS 32  
DS 2  
SWH 6009.615 Hz  
FIDRES 0.183399 Hz  
AQ 2.7262976 sec  
RG 181  
DW 83.200 use  
DE 12.89 use  
TE 294.3 K  
D1 1.00000000 sec  
TD0 1

===== CHANNEL f1 =====  
SFO1 300.1318534 MHz  
NUC1 1H  
P1 12.80 use  
PLW1 9.57730007 W

F2 - Processing parameters  
SI 32768  
SF 300.1300072 MHz  
WDW EM  
SSB 0  
LB 0.30 Hz  
GB 0  
PC 1.00

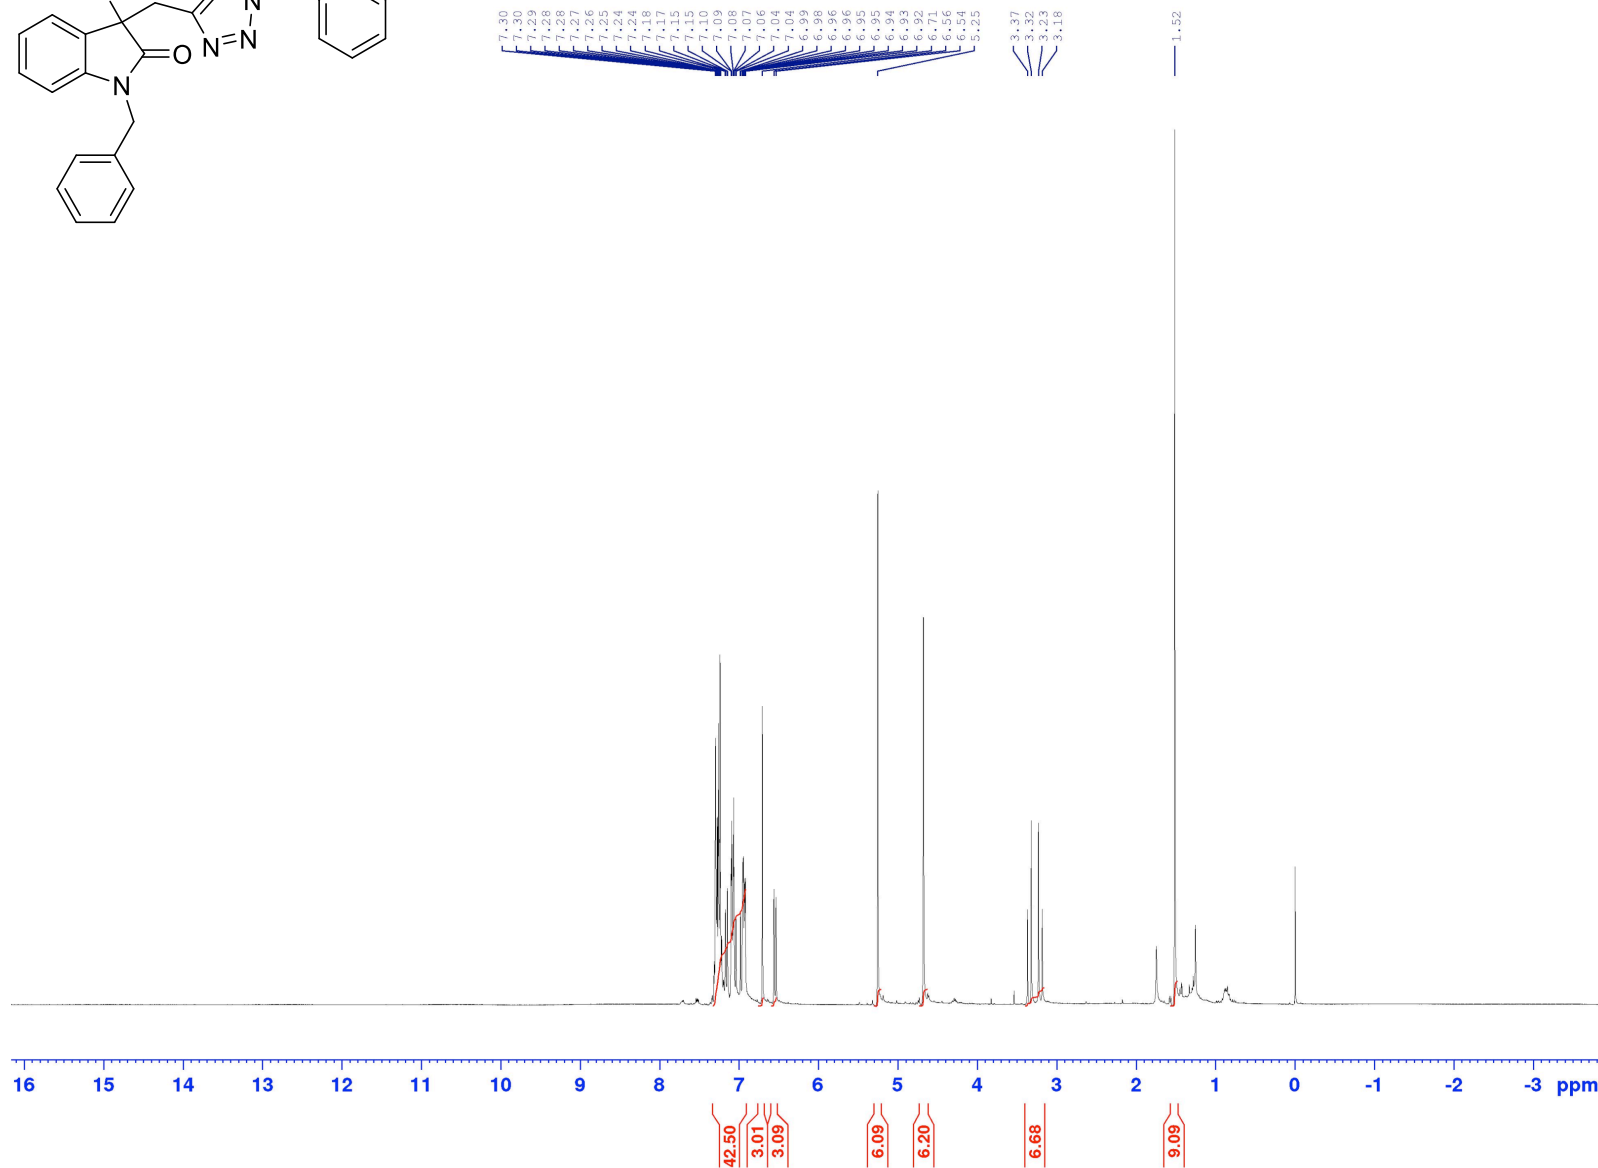

# <sup>13</sup>C NMR (2a)

WB3-79

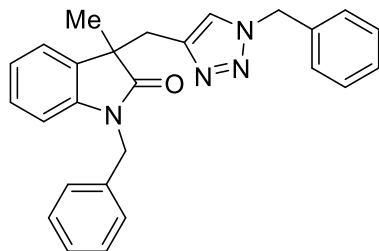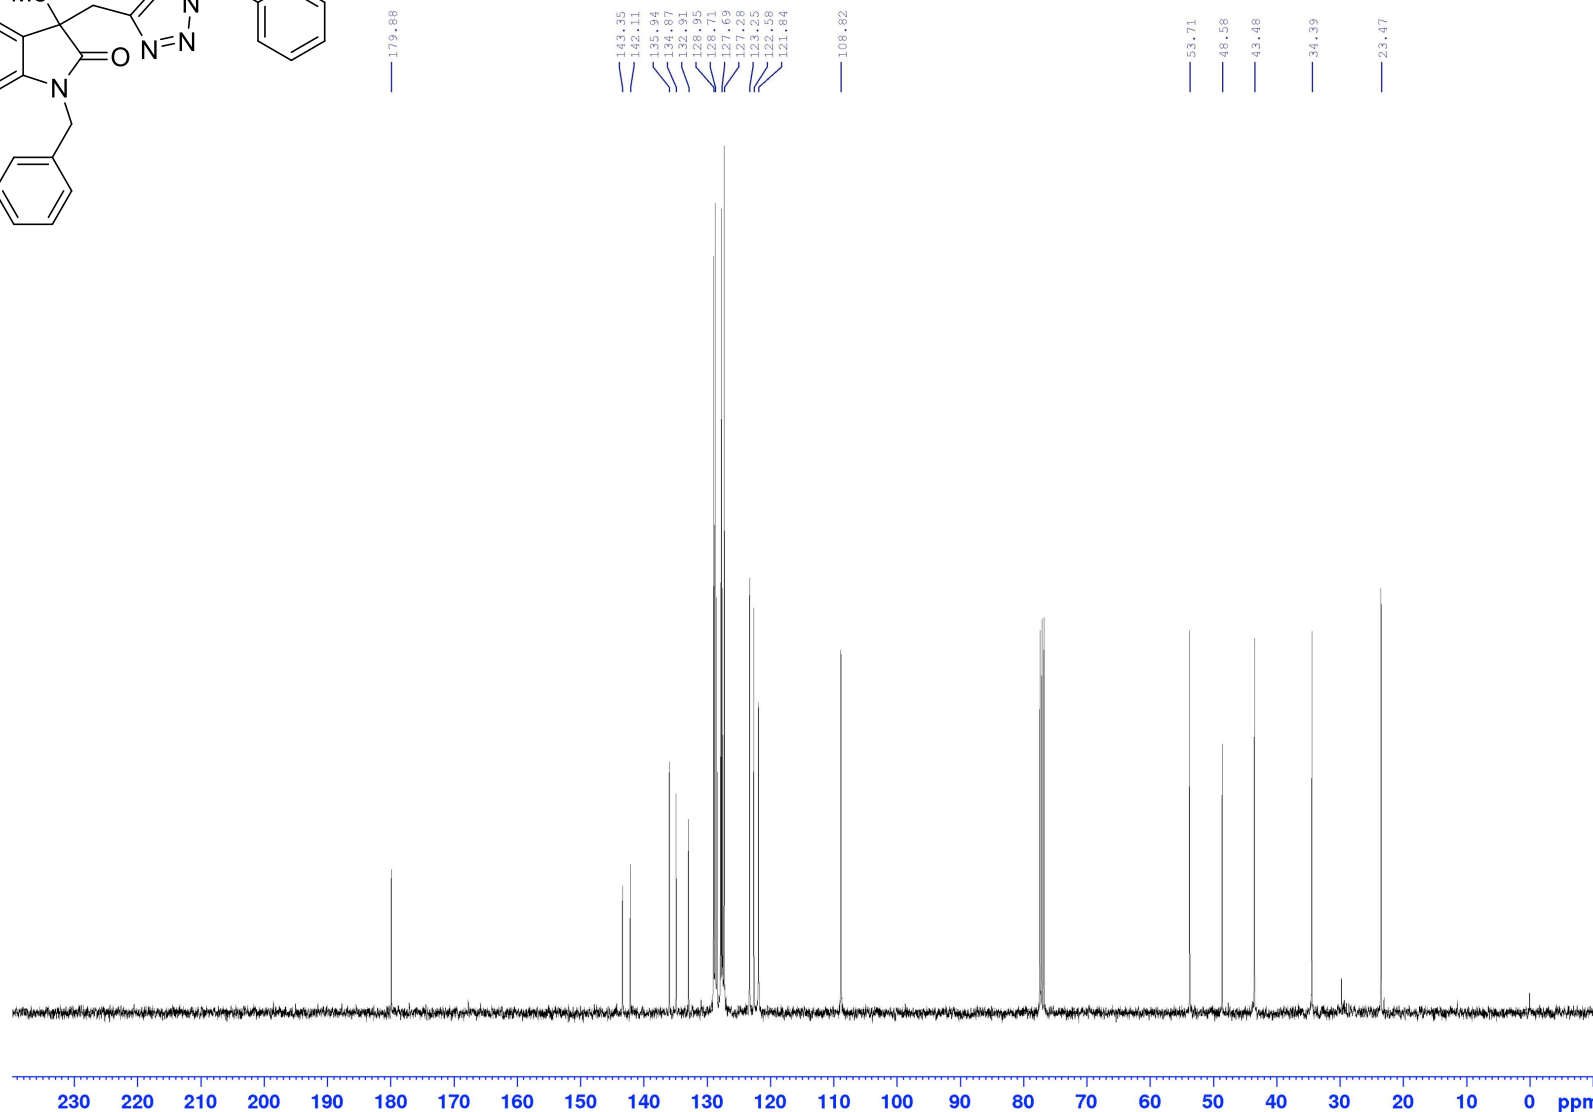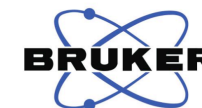

Current Data Parameters  
NAME 02-04-Fossey-9  
EXPNO 10  
PROCNO 1

F2 - Acquisition Parameters  
Date\_ 20150204  
Time 20.23  
INSTRUM spect  
PROBHD 5 mm PADUL 13C  
PULPROG udeft  
TD 18178  
SOLVENT CDCl3  
NS 380  
DS 0  
SWH 25252.525 Hz  
FIDRES 1.389181 Hz  
AQ 0.3599244 sec  
RG 2050  
DW 19.800 use  
DE 8.20 use  
TE 293.3 K  
D1 3.00000000 sec  
D11 0.03000000 sec  
D12 0.00002000 sec  
D20 200.00000000 sec  
TD0 380

===== CHANNEL f1 =====  
SFO1 100.6242690 MHz  
NUC1 13C  
P1 8.80 use  
P13 2000.00 use  
P26 500.00 use  
PLW1 58.63899994 W  
SPNAM[5] Crp60comp.4  
SPOAL5 0.500  
SPOFFS5 0 Hz  
SPW5 6.93809986 W  
SPNAM[8] Crp60,0.5,20.1  
SPOAL8 0.500  
SPOFFS8 0 Hz  
SPW8 6.93809986 W

===== CHANNEL f2 =====  
SFO2 400.1320000 MHz  
NUC2 1H  
CPDPRG[2] waltz16  
PCPD2 90.00 use  
PLW2 24.29199982 W  
PLW12 0.28218001 W

F2 - Processing parameters  
SI 65536  
SF 100.6127690 MHz  
WDW EM  
SSB 0  
LB 2.00 Hz  
GB 0  
PC 1.00

# <sup>1</sup>H NMR (2b)

WB C1-3

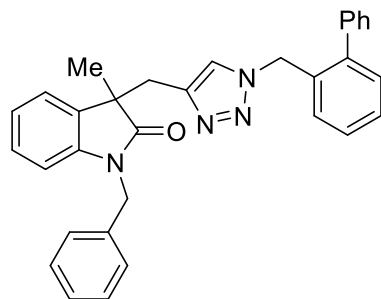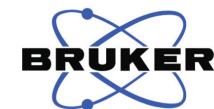

Current Data Parameters  
NAME 02-20-Fossey-4  
EXPNO 10  
PROCNO 1

F2 - Acquisition Parameters  
Date\_ 20150220  
Time 10.40  
INSTRUM spect  
PROBHD 5 mm PABBO BB-  
PULPROG zg30  
TD 32768  
SOLVENT CDCl<sub>3</sub>  
NS 32  
DS 2  
SWH 6009.615 Hz  
FIDRES 0.183399 Hz  
AQ 2.7262976 sec  
RG 228  
DW 83.200 use  
DE 12.89 use  
TE 294.2 K  
D1 1.00000000 sec  
TD0 1

===== CHANNEL f1 =====  
SF01 300.1318534 MHz  
NUC1 1H  
P1 12.80 use  
PLW1 9.57730007 W

F2 - Processing parameters  
SI 32768  
SF 300.1300074 MHz  
WDW EM  
SSB 0  
LB 0.30 Hz  
GB 0  
PC 1.00

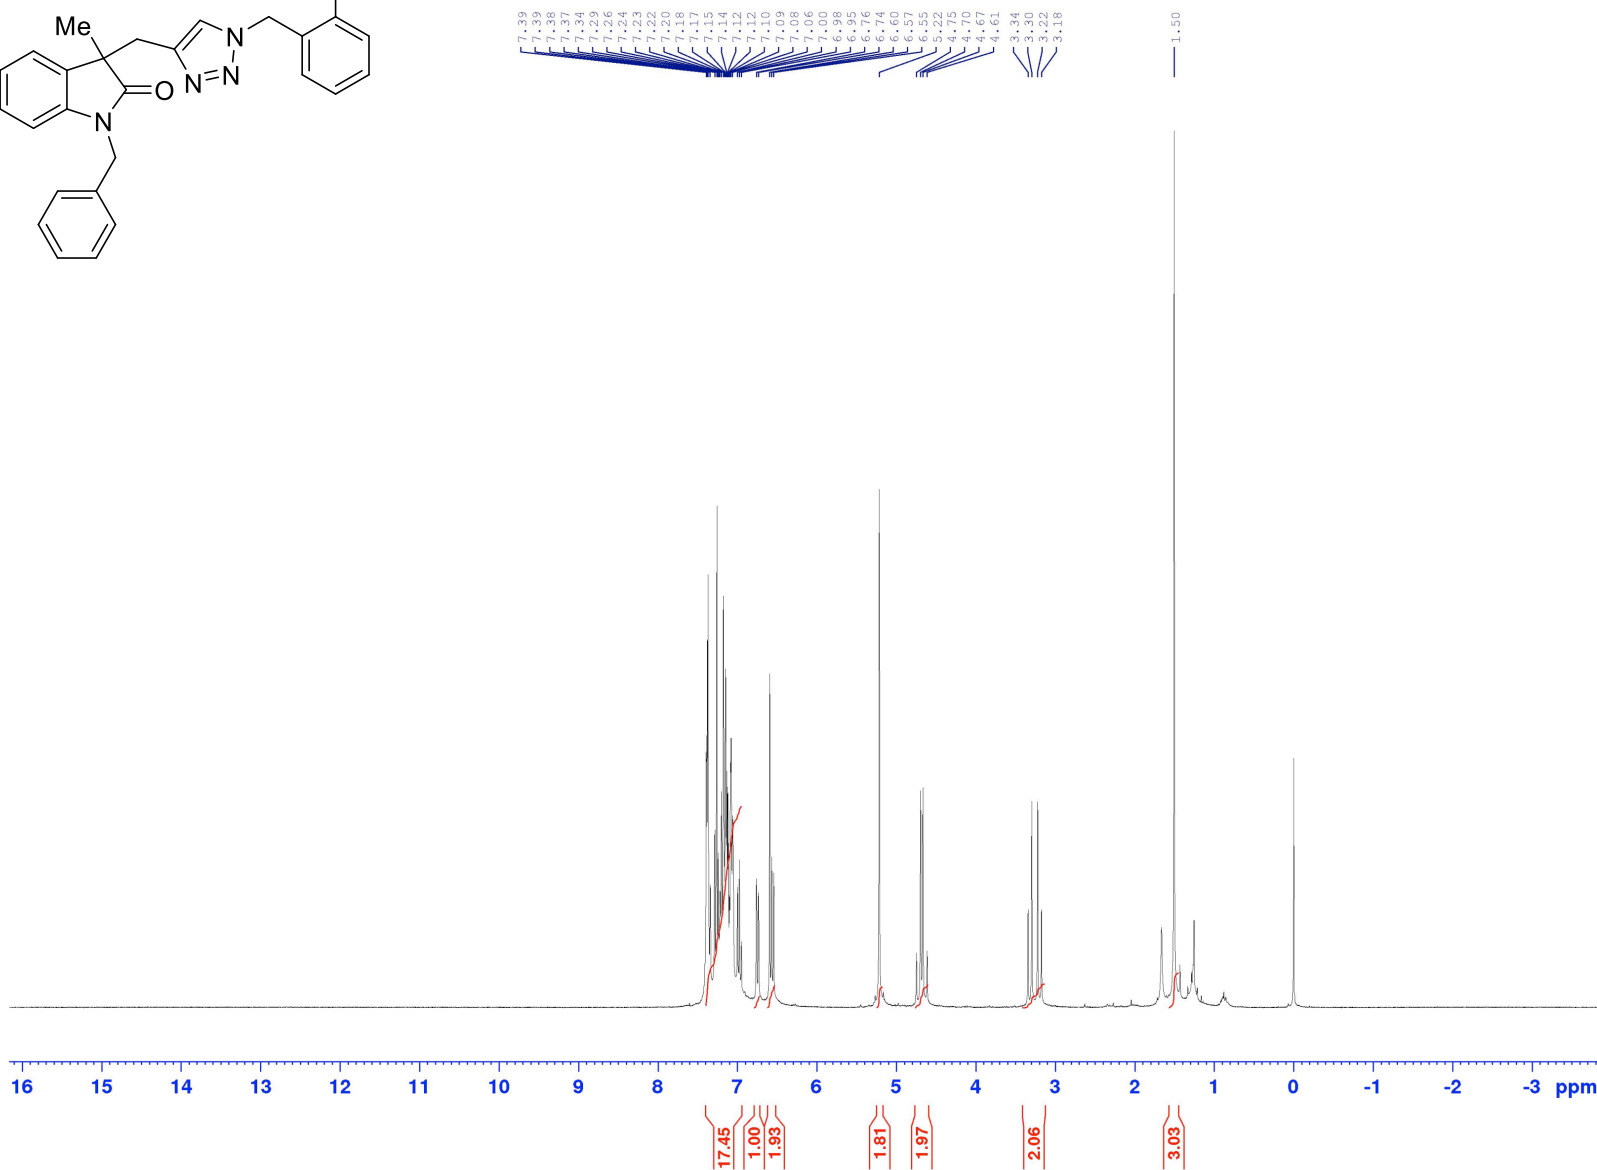

# <sup>13</sup>C NMR (2b)

WB C1-4-2

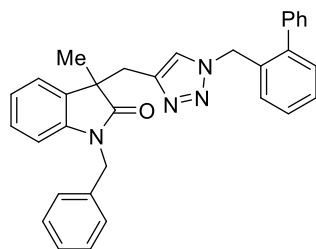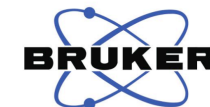

Current Data Parameters  
NAME 02-10-Fossey-22  
EXPNO 10  
PROCNO 1

F2 - Acquisition Parameters  
Date\_ 20150211  
Time 2.25  
INSTRUM spect  
PROBHD 5 mm PADUL 13C  
PULPROG udeflt  
TD 18178  
SOLVENT CDCl3  
NS 380  
DS 0  
SWH 25252.525 Hz  
FIDRES 1.389181 Hz  
AQ 0.3599244 sec  
RG 2050  
DW 19.800 use  
DE 8.20 use  
TE 293.1 K  
D1 3.00000000 sec  
D11 0.03000000 sec  
D12 0.00002000 sec  
D20 200.00000000 sec  
TD0 380

===== CHANNEL f1 =====  
SFO1 100.6242690 MHz  
NUC1 13C  
P1 8.80 use  
P13 2000.00 use  
P26 500.00 use  
PLW1 58.63899994 W  
SPNAM[5] Crp60comp.4  
SPOAL5 0.500  
SPOFFS5 0 Hz  
SPW5 6.93809986 W  
SPNAM[8] Crp60,0.5,20.1  
SPOAL8 0.500  
SPOFFS8 0 Hz  
SPW8 6.93809986 W

===== CHANNEL f2 =====  
SFO2 400.1320000 MHz  
NUC2 1H  
CPDPRG[2] waltz16  
PCPD2 90.00 use  
PLW2 24.29199982 W  
PLW12 0.28218001 W

F2 - Processing parameters  
SI 65536  
SF 100.6127690 MHz  
WDW EM  
SSB 0  
LB 2.00 Hz  
GB 0  
PC 1.00

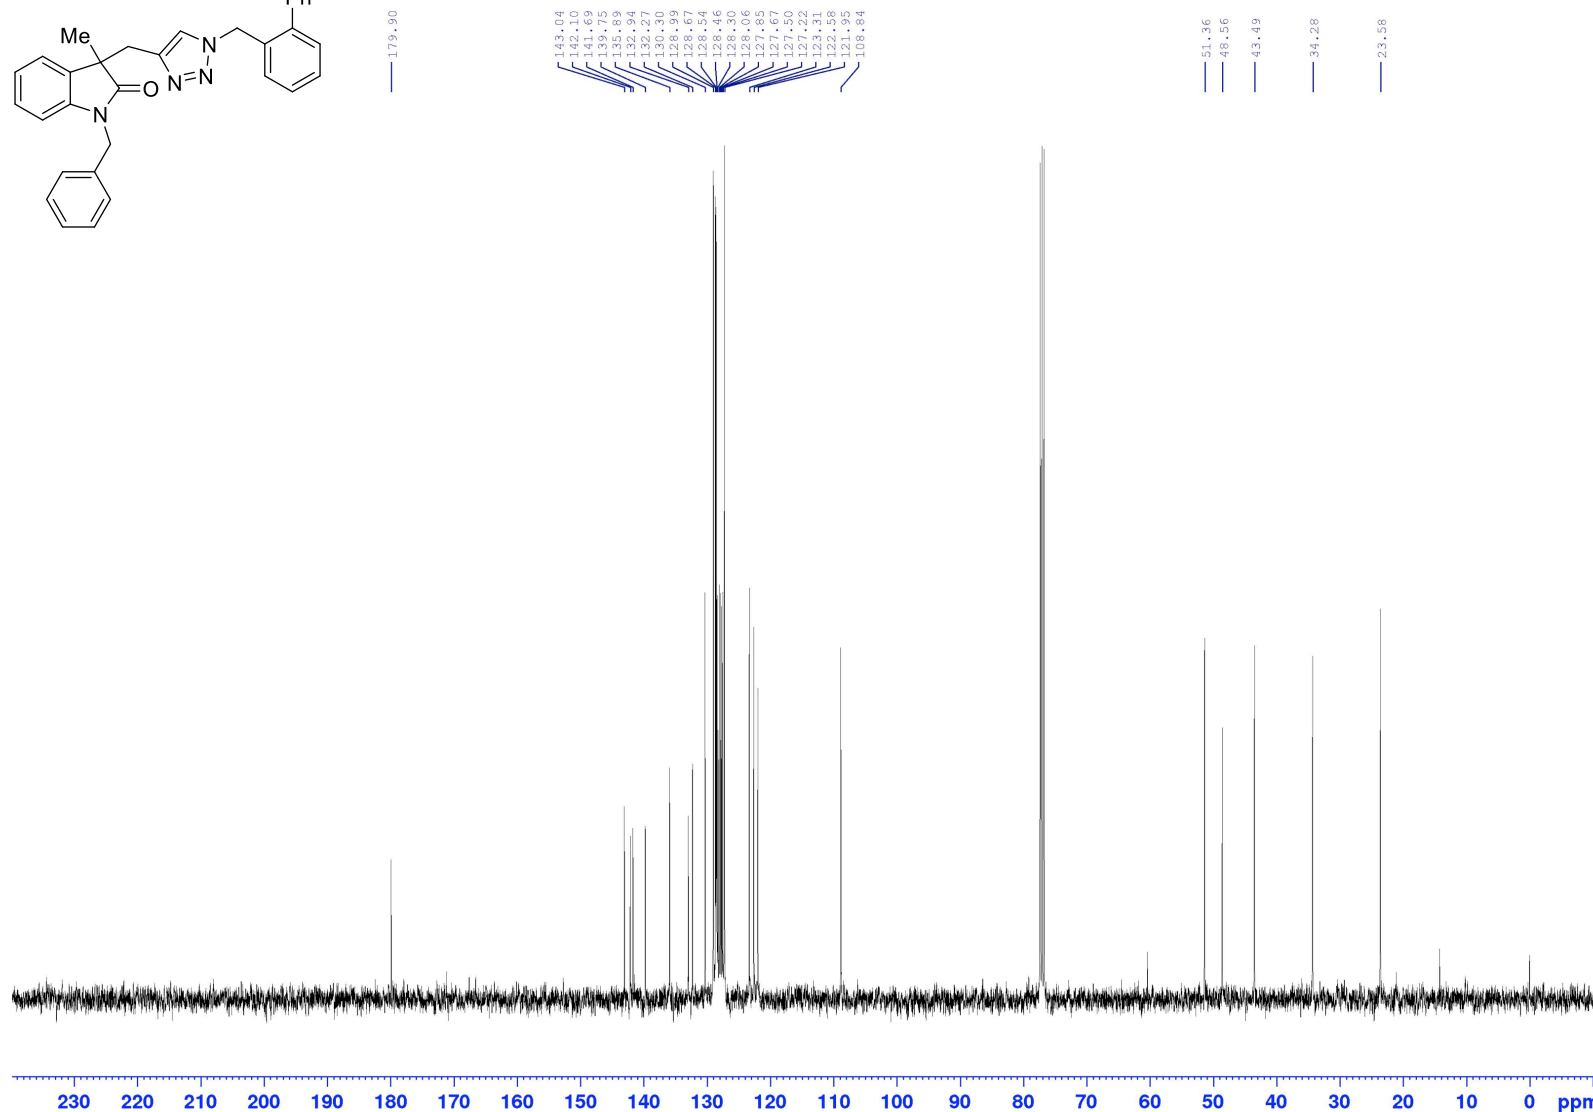

# <sup>1</sup>H NMR (2c)

WB C1-2

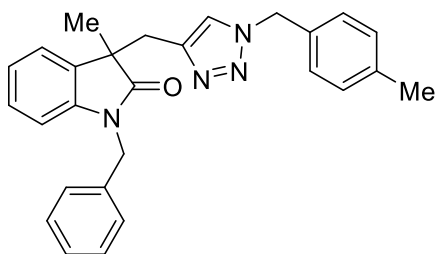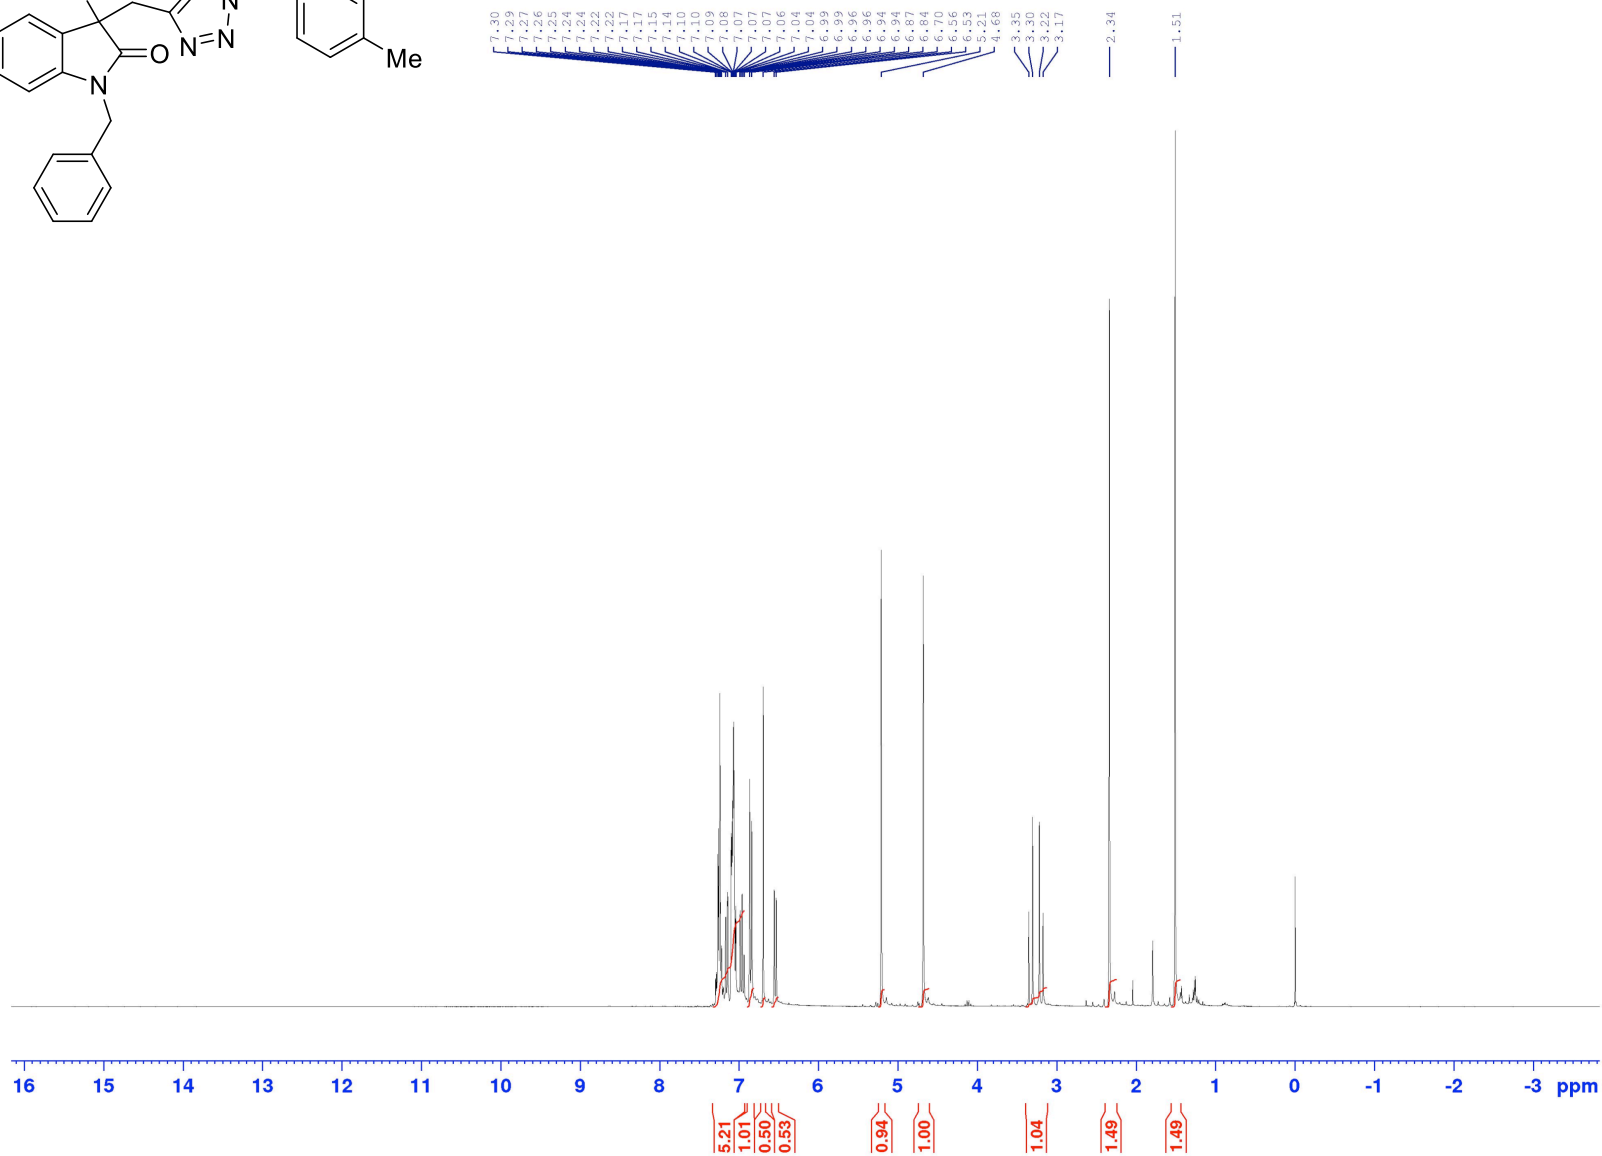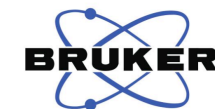

Current Data Parameters  
NAME 02-04-Fossey-33  
EXPNO 10  
PROCNO 1

F2 - Acquisition Parameters  
Date\_ 20150204  
Time 16.19  
INSTRUM spect  
PROBHD 5 mm PABBO BB-  
PULPROG zg30  
TD 32768  
SOLVENT CDCl3  
NS 32  
DS 2  
SWH 6009.615 Hz  
FIDRES 0.183399 Hz  
AQ 2.7262976 sec  
RG 181  
DW 83.200 use  
DE 12.89 use  
TE 293.6 K  
D1 1.00000000 sec  
TD0 1

===== CHANNEL f1 =====  
SFO1 300.1318534 MHz  
NUC1 1H  
P1 12.80 use  
PLW1 9.57730007 W

F2 - Processing parameters  
SI 32768  
SF 300.1300073 MHz  
WDW EM  
SSB 0  
LB 0.30 Hz  
GB 0  
PC 1.00

# <sup>13</sup>C NMR (2c)

WB C1-2

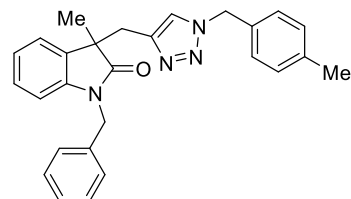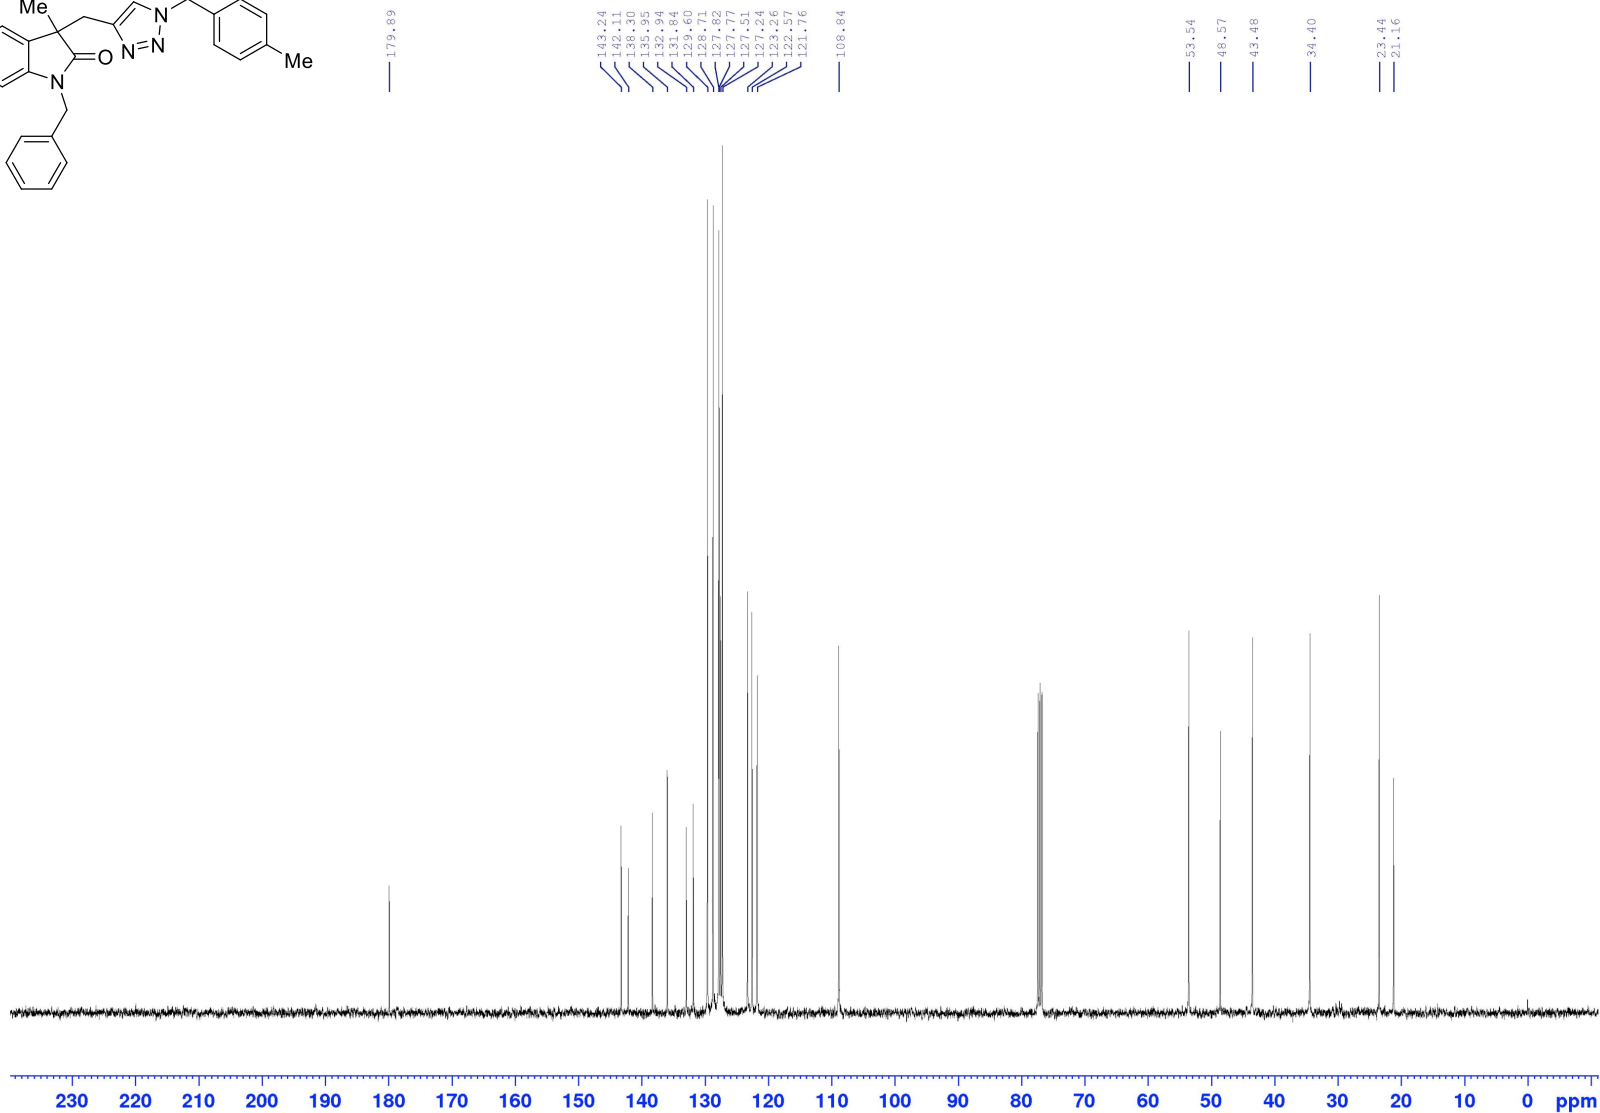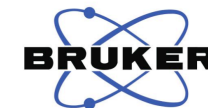

Current Data Parameters  
NAME 02-09-Fossey-2  
EXPNO 10  
PROCNO 1

F2 - Acquisition Parameters  
Date\_ 20150209  
Time 11.03  
INSTRUM spect  
PROBHD 5 mm PADUL 13C  
PULPROG udeft  
TD 18178  
SOLVENT CDCl3  
NS 380  
DS 0  
SWH 25252.525 Hz  
FIDRES 1.389181 Hz  
AQ 0.3599244 sec  
RG 2050  
DW 19.800 use  
DE 8.20 use  
TE 293.0 K  
D1 3.00000000 sec  
D11 0.03000000 sec  
D12 0.00002000 sec  
D20 200.00000000 sec  
TD0 380

===== CHANNEL f1 =====  
SFO1 100.6242690 MHz  
NUC1 13C  
P1 8.80 use  
P13 2000.00 use  
P26 500.00 use  
PLW1 58.63899994 W  
SPNAM[5] Crp60comp.4  
SPOAL5 0.500  
SPOFFS5 0 Hz  
SPW5 6.93809986 W  
SPNAM[8] Crp60,0.5,20.1  
SPOAL8 0.500  
SPOFFS8 0 Hz  
SPW8 6.93809986 W

===== CHANNEL f2 =====  
SFO2 400.1320000 MHz  
NUC2 1H  
CPDPRG[2] waltz16  
PCPD2 90.00 use  
PLW2 24.29199982 W  
PLW12 0.28218001 W

F2 - Processing parameters  
SI 65536  
SF 100.6127690 MHz  
WDW EM  
SSB 0  
LB 2.00 Hz  
GB 0  
PC 1.00

# <sup>1</sup>H NMR (2d)

WB C1-4

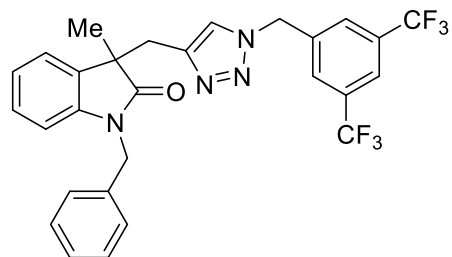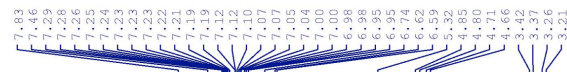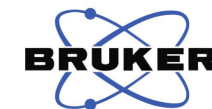

Current Data Parameters  
NAME 02-20-Fossey-5  
EXPNO 10  
PROCNO 1

F2 - Acquisition Parameters  
Date\_ 20150220  
Time 10.47  
INSTRUM spect  
PROBHD 5 mm PABBO BB-  
PULPROG zg30  
TD 32768  
SOLVENT CDCl3  
NS 32  
DS 2  
SWH 6009.615 Hz  
FIDRES 0.183399 Hz  
AQ 2.7262976 sec  
RG 181  
DW 83.200 use  
DE 12.89 use  
TE 294.2 K  
D1 1.00000000 sec  
TD0 1

===== CHANNEL f1 =====  
SF01 300.1318534 MHz  
NUC1 1H  
P1 12.80 use  
PLW1 9.57730007 W

F2 - Processing parameters  
SI 32768  
SF 300.1300065 MHz  
WDW EM  
SSB 0  
LB 0.30 Hz  
GB 0  
PC 1.00

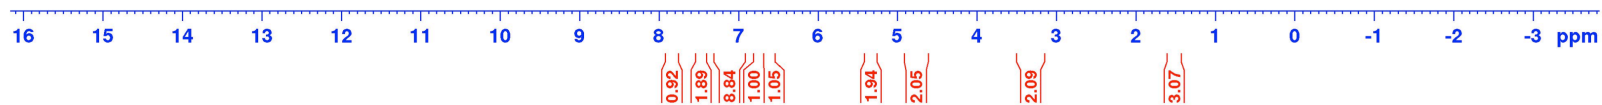

# <sup>13</sup>C NMR (2d)

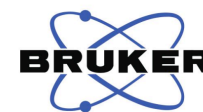

Current Data Parameters  
NAME 02-09-Fossey-3  
EXPNO 10  
PROCNO 1

F2 - Acquisition Parameters  
Date\_ 20150209  
Time 11.38  
INSTRUM spect  
PROBHD 5 mm PADUL 13C  
PULPROG udeflt  
TD 18178  
SOLVENT CDCl3  
NS 380  
DS 0  
SWH 25252.525 Hz  
FIDRES 1.389181 Hz  
AQ 0.3599244 sec  
RG 2050  
DW 19.800 use  
DE 8.20 use  
TE 293.3 K  
D1 3.00000000 sec  
D11 0.03000000 sec  
D12 0.00002000 sec  
D20 200.00000000 sec  
TD0 380

===== CHANNEL f1 =====  
SFO1 100.6242690 MHz  
NUC1 13C  
P1 8.80 use  
P13 2000.00 use  
P26 500.00 use  
PLW1 58.63899994 W  
SPNAM[5] Crp60comp.4  
SPOAL5 0.500  
SPOFFS5 0 Hz  
SPW5 6.93809986 W  
SPNAM[8] Crp60,0.5,20.1  
SPOAL8 0.500  
SPOFFS8 0 Hz  
SPW8 6.93809986 W

===== CHANNEL f2 =====  
SFO2 400.1320000 MHz  
NUC2 1H  
CPDPRG[2] waltz16  
PCPD2 90.00 use  
PLW2 24.29199982 W  
PLW12 0.28218001 W

F2 - Processing parameters  
SI 65536  
SF 100.6127690 MHz  
WDW EM  
SSB 0  
LB 2.00 Hz  
GB 0  
PC 1.00

WB C1-4

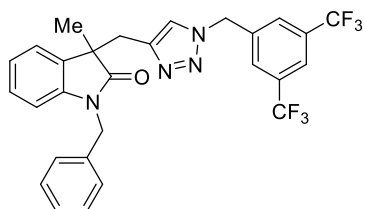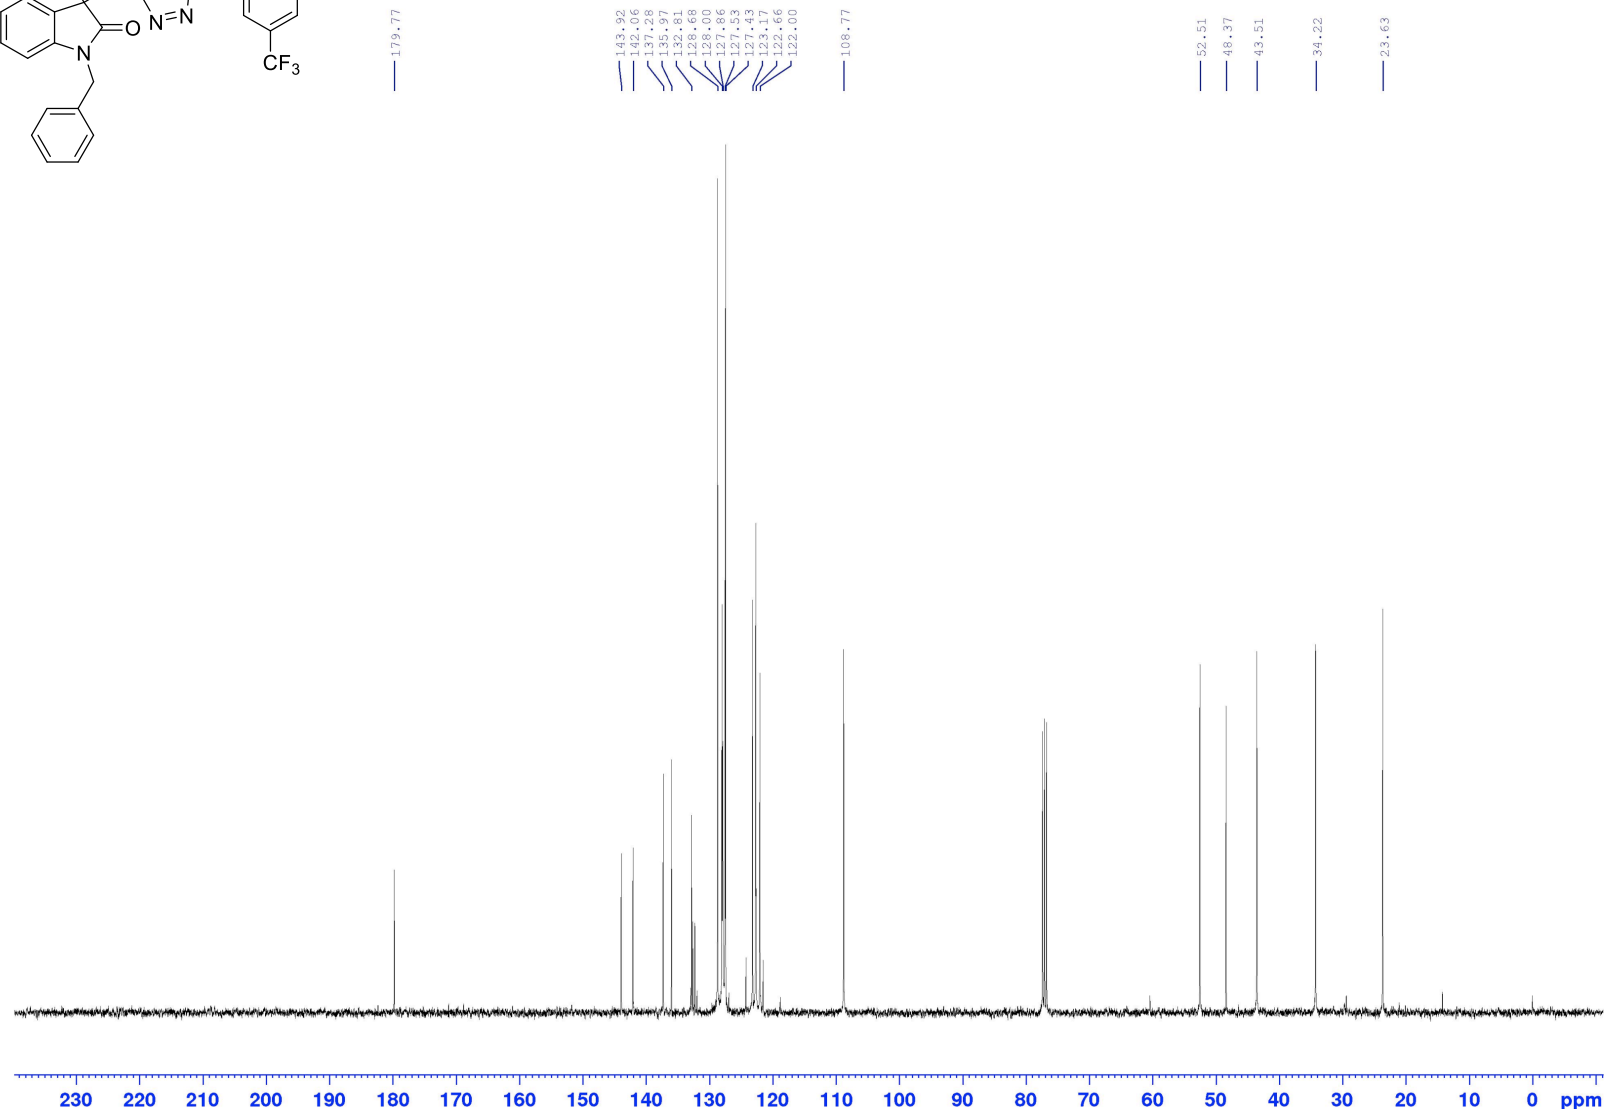



# <sup>19</sup>F NMR (2d)

WBC1-4

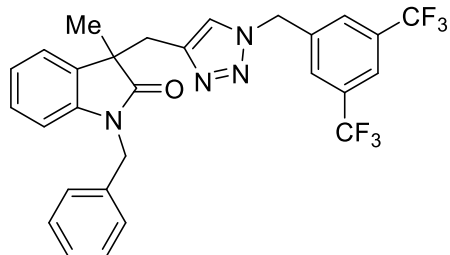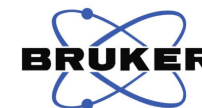

Current Data Parameters  
NAME 05-05-Fossey-7  
EXPNO 10  
PROCNO 1

F2 - Acquisition Parameters  
Date\_ 20150505  
Time 11.17  
INSTRUM spect  
PROBHD 5 mm PABBO BB-  
PULPROG zgig  
TD 131072  
SOLVENT CDCl<sub>3</sub>  
NS 32  
DS 4  
SWH 66964.289 Hz  
FIDRES 0.510897 Hz  
AQ 0.9786710 sec  
RG 456  
DW 7.467 use  
DE 7.27 use  
TE 294.2 K  
D1 3.00000000 sec  
D11 0.03000000 sec  
TD0 1

===== CHANNEL f1 =====  
SFO1 282.3823550 MHz  
NUC1 19F  
P1 8.70 use  
PLW1 30.58200073 W

===== CHANNEL f2 =====  
SFO2 300.1312005 MHz  
NUC2 1H  
CPDPRG[2] waltz16  
PCPD2 90.00 use  
PLW2 9.57730007 W  
PLW12 0.19372000 W

F2 - Processing parameters  
SI 131072  
SF 282.4043550 MHz  
WDW EM  
SSB 0  
LB 0.50 Hz  
GB 0  
PC 1.00

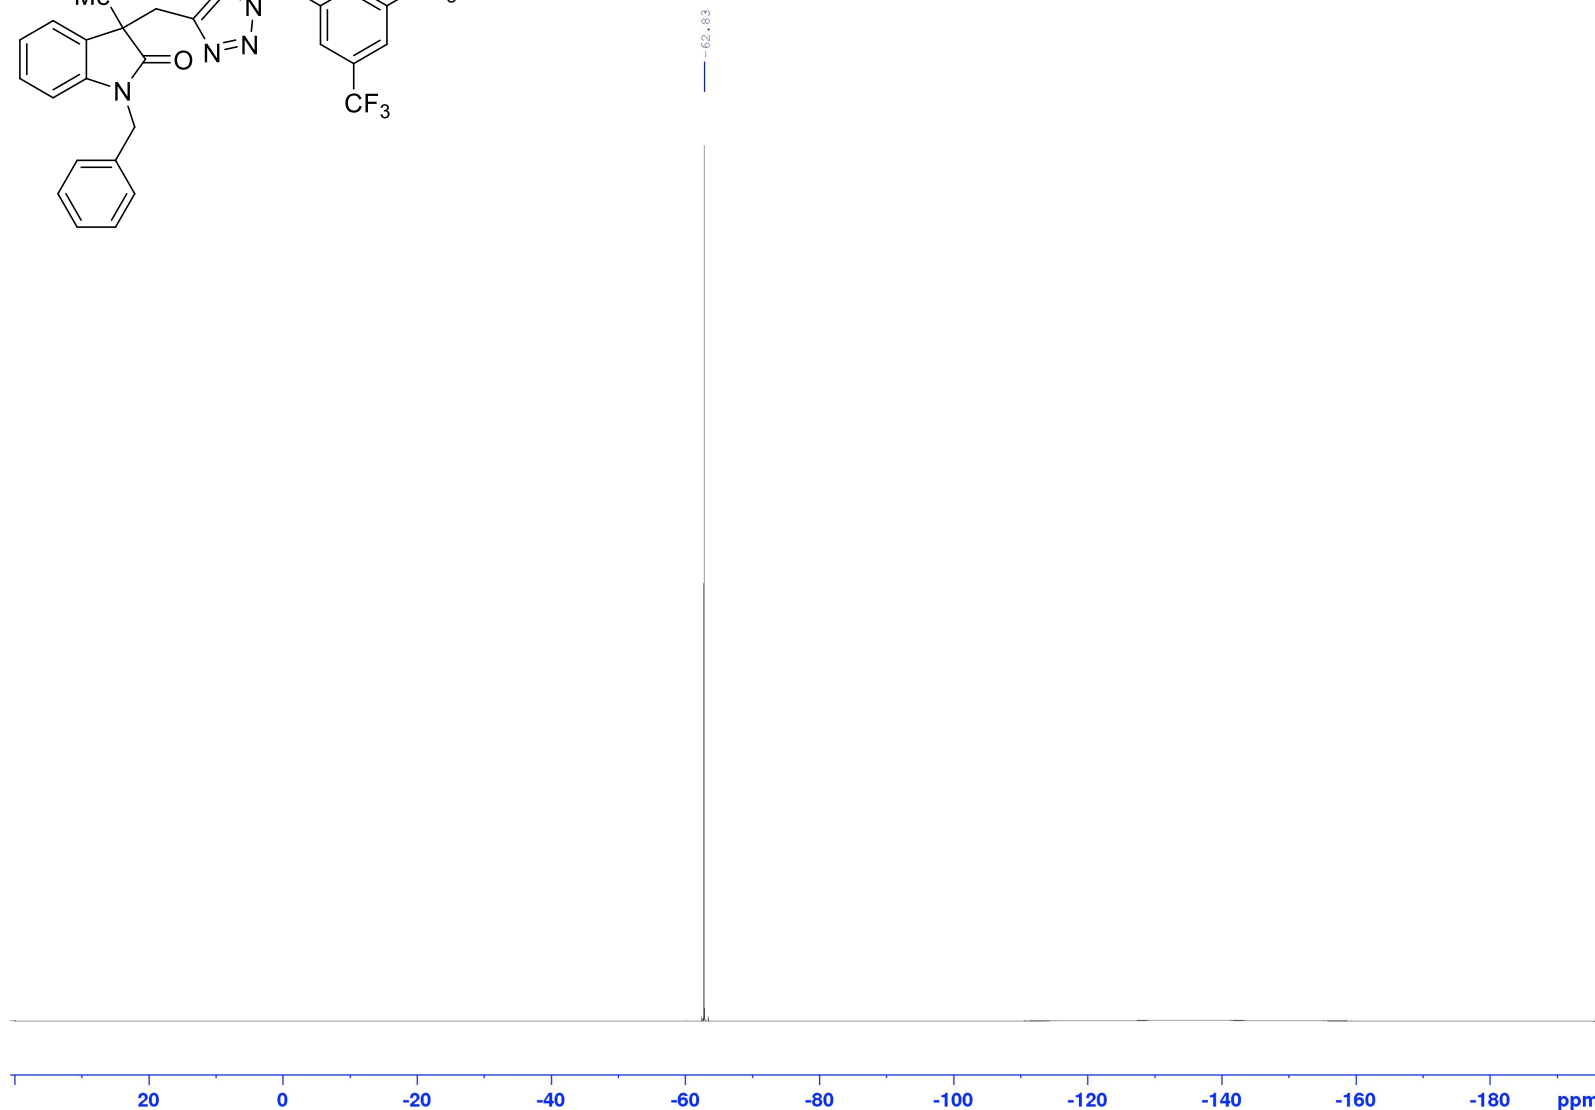

# <sup>1</sup>H NMR (2e)

WB C1-1

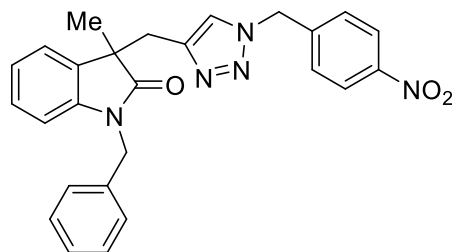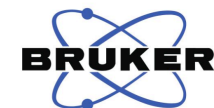

Current Data Parameters  
NAME 02-19-Fossey-37  
EXPNO 10  
PROCNO 1

F2 - Acquisition Parameters  
Date\_ 20150219  
Time 15.22  
INSTRUM spect  
PROBHD 5 mm PABBO BB-  
PULPROG zg30  
TD 32768  
SOLVENT CDCl3  
NS 32  
DS 2  
SWH 6009.615 Hz  
FIDRES 0.183399 Hz  
AQ 2.7262976 sec  
RG 456  
DW 83.200 use  
DE 12.89 use  
TE 294.3 K  
D1 1.00000000 sec  
TD0 1

===== CHANNEL f1 =====  
SFO1 300.1318534 MHz  
NUC1 1H  
P1 12.80 use  
PLW1 9.57730007 W

F2 - Processing parameters  
SI 32768  
SF 300.1300066 MHz  
WDW EM  
SSB 0  
LB 0.30 Hz  
GB 0  
PC 1.00

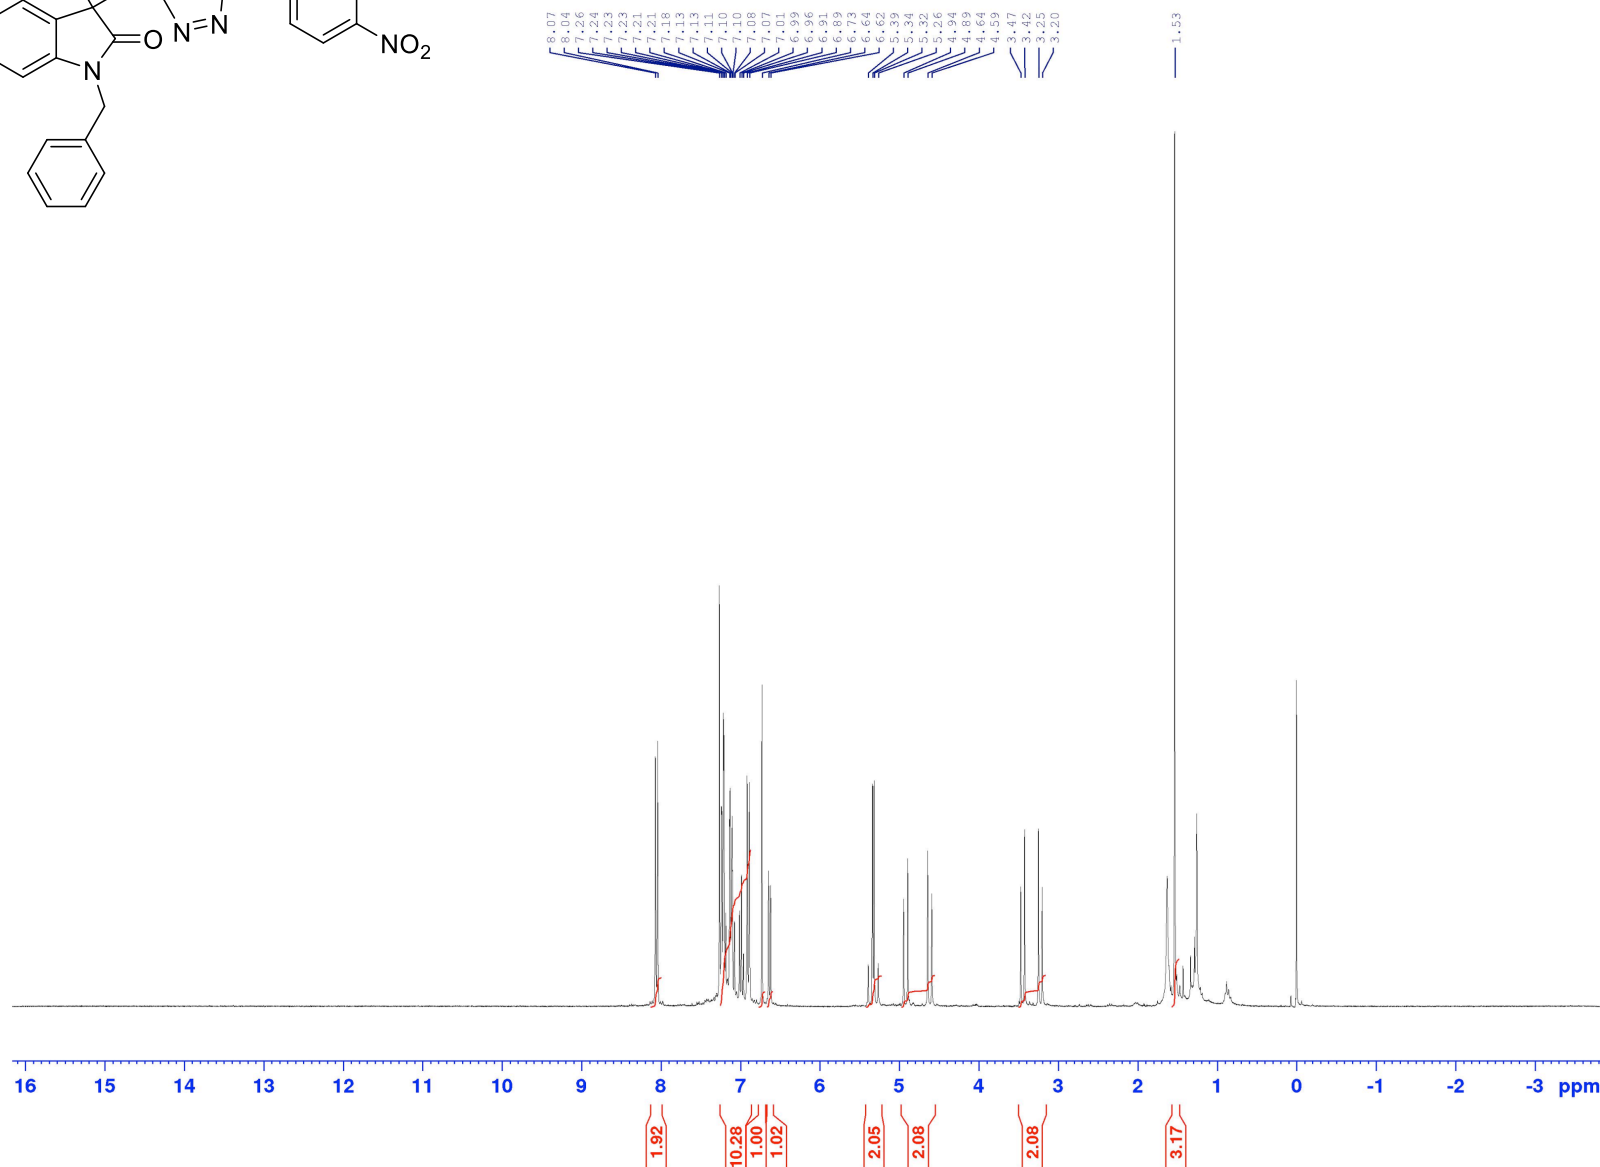

13C NMR (2e)

WB C1-1

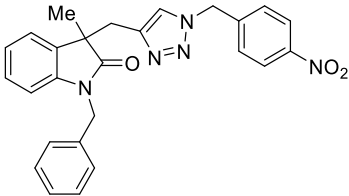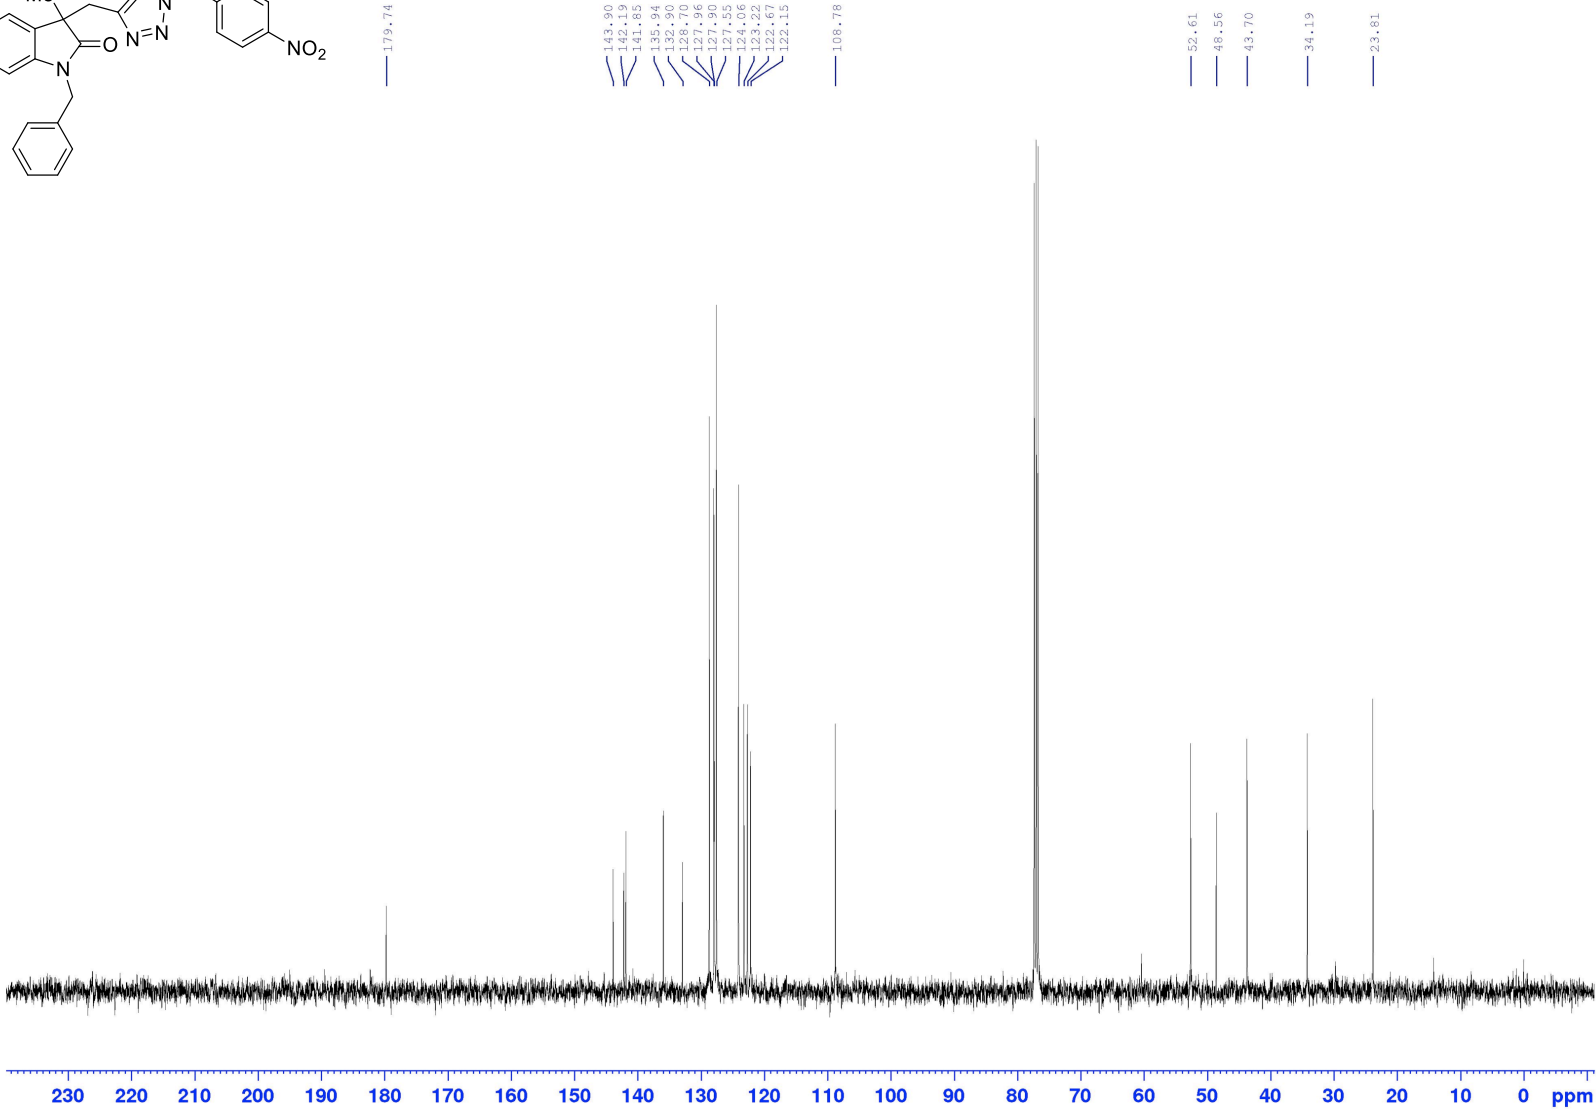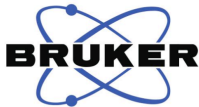

Current Data Parameters  
NAME 02-04-Fossey-10  
EXPNO 10  
PROCNO 1

F2 - Acquisition Parameters  
Date\_ 20150204  
Time 20.59  
INSTRUM spect  
PROBHD 5 mm PADUL 13C  
PULPROG udeft  
TD 18178  
SOLVENT CDCl3  
NS 380  
DS 0  
SWH 25252.525 Hz  
FIDRES 1.389181 Hz  
AQ 0.3599244 sec  
RG 2050  
DW 19.800 use  
DE 8.20 use  
TE 293.3 K  
D1 3.00000000 sec  
D11 0.03000000 sec  
D12 0.00002000 sec  
D20 200.00000000 sec  
TD0 380

===== CHANNEL f1 =====  
SFO1 100.6242690 MHz  
NUC1 13C  
P1 8.80 use  
P13 2000.00 use  
P26 500.00 use  
PLW1 58.63899994 W  
SPNAM[5] Crp60comp.4  
SPOAL5 0.500  
SPOFFS5 0 Hz  
SPW5 6.93809986 W  
SPNAM[8] Crp60,0.5,20.1  
SPOAL8 0.500  
SPOFFS8 0 Hz  
SPW8 6.93809986 W

===== CHANNEL f2 =====  
SFO2 400.1320000 MHz  
NUC2 1H  
CPDPRG[2] waltz16  
PCPD2 90.00 use  
PLW2 24.29199982 W  
PLW12 0.28218001 W

F2 - Processing parameters  
SI 65536  
SF 100.6127690 MHz  
WDW EM  
SSB 0  
LB 2.00 Hz  
GB 0  
PC 1.00

# <sup>1</sup>H NMR (2f)

WB C1-6

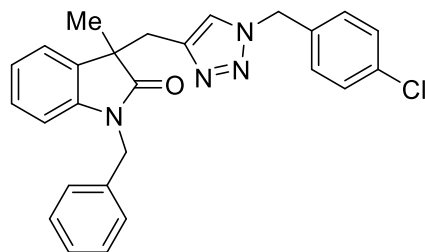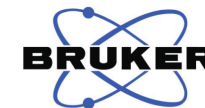

Current Data Parameters  
NAME 02-20-Fossey-34  
EXPNO 10  
PROCNO 1

F2 - Acquisition Parameters  
Date\_ 20150220  
Time 14.37  
INSTRUM spect  
PROBHD 5 mm PABBO BB-  
PULPROG zg30  
TD 32768  
SOLVENT CDCl3  
NS 32  
DS 2  
SWH 6009.615 Hz  
FIDRES 0.183399 Hz  
AQ 2.7262976 sec  
RG 161  
DW 83.200 use  
DE 12.89 use  
TE 294.2 K  
D1 1.00000000 sec  
TD0 1

===== CHANNEL f1 =====  
SFO1 300.1318534 MHz  
NUC1 1H  
P1 12.80 use  
PLW1 9.57730007 W

F2 - Processing parameters  
SI 32768  
SF 300.1300065 MHz  
WDW EM  
SSB 0  
LB 0.30 Hz  
GB 0  
PC 1.00

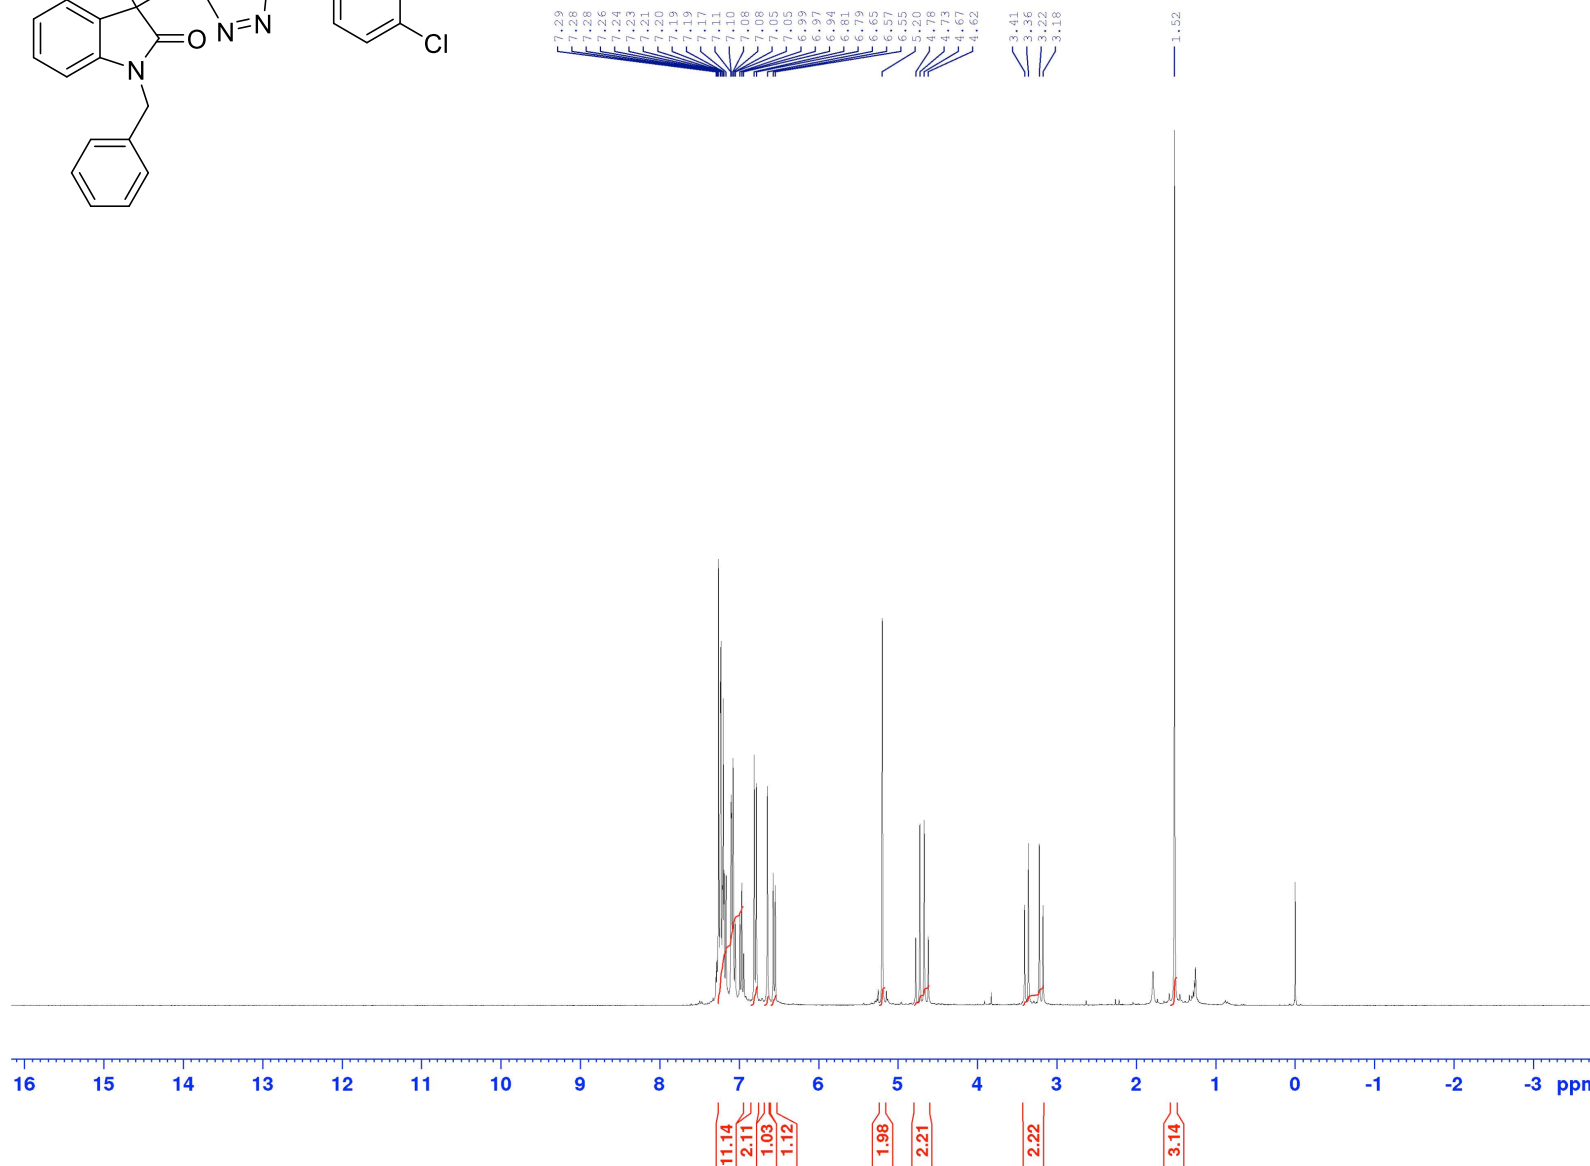

# <sup>13</sup>C NMR (2f)

WB C1-6

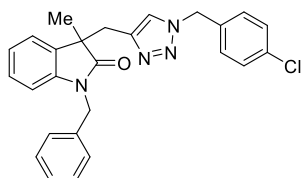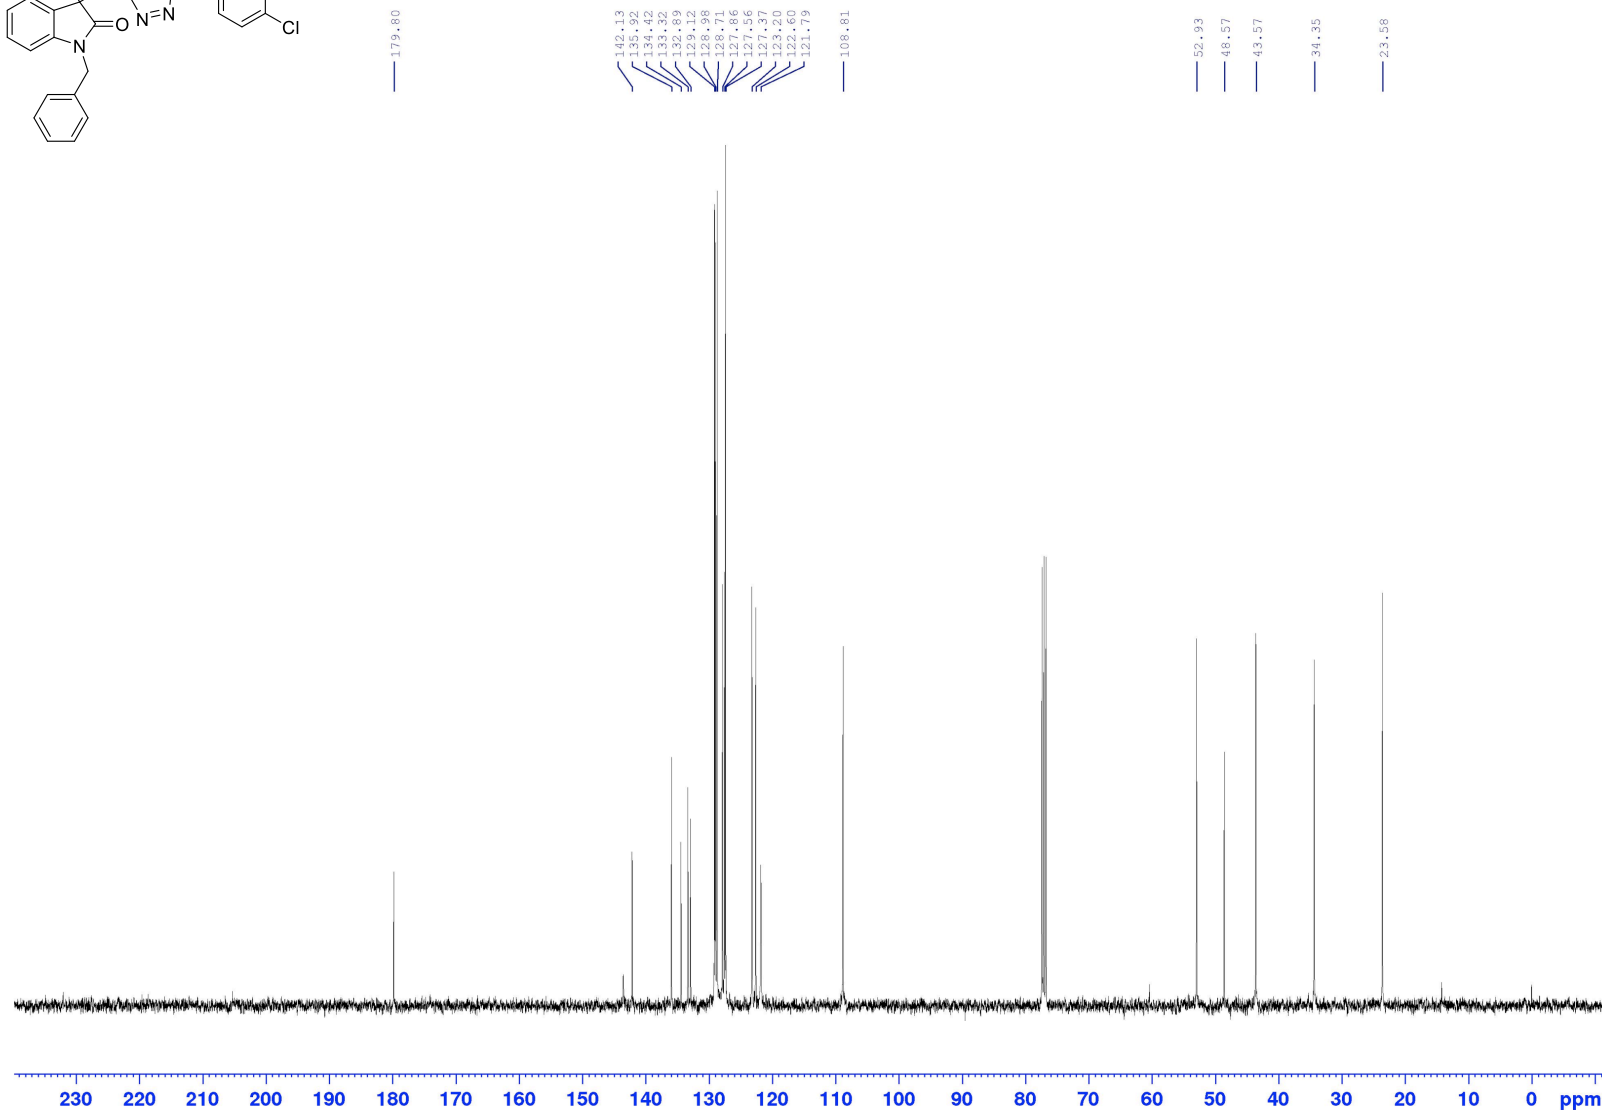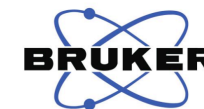

Current Data Parameters  
NAME 02-12-Fossey-13  
EXPNO 10  
PROCNO 1

F2 - Acquisition Parameters  
Date\_ 20150212  
Time 19.44  
INSTRUM spect  
PROBHD 5 mm PADUL 13C  
PULPROG udeflt  
TD 18178  
SOLVENT CDCl3  
NS 380  
DS 0  
SWH 25252.525 Hz  
FIDRES 1.389181 Hz  
AQ 0.3599244 sec  
RG 2050  
DW 19.800 use  
DE 8.20 use  
TE 293.2 K  
D1 3.00000000 sec  
D11 0.03000000 sec  
D12 0.00002000 sec  
D20 200.00000000 sec  
TD0 380

===== CHANNEL f1 =====  
SFO1 100.6242690 MHz  
NUC1 13C  
P1 8.80 use  
P13 2000.00 use  
P26 500.00 use  
PLW1 58.63899994 W  
SPNAM[5] Crp60comp.4  
SPOAL5 0.500  
SPOFFS5 0 Hz  
SPW5 6.93809986 W  
SPNAM[8] Crp60,0.5,20.1  
SPOAL8 0.500  
SPOFFS8 0 Hz  
SPW8 6.93809986 W

===== CHANNEL f2 =====  
SFO2 400.1320000 MHz  
NUC2 1H  
CPDPRG[2] waltz16  
PCPD2 90.00 use  
PLW2 24.29199982 W  
PLW12 0.28218001 W

F2 - Processing parameters  
SI 65536  
SF 100.6127690 MHz  
WDW EM  
SSB 0  
LB 2.00 Hz  
GB 0  
PC 1.00

# <sup>1</sup>H NMR (2g)

WB C1-5

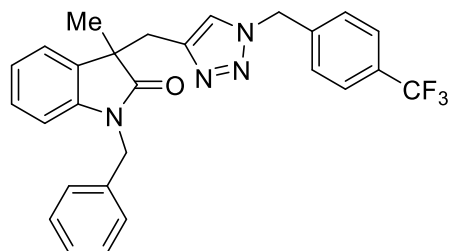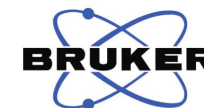

Current Data Parameters  
NAME 02-09-Fossey-3-1H  
EXPNO 10  
PROCNO 1

F2 - Acquisition Parameters  
Date\_ 20150209  
Time 19.14  
INSTRUM spect  
PROBHD 5 mm PABBO BB-  
PULPROG zg30  
TD 32768  
SOLVENT CDCl3  
NS 32  
DS 2  
SWH 6009.615 Hz  
FIDRES 0.183399 Hz  
AQ 2.7262976 sec  
RG 161  
DW 83.200 use  
DE 12.89 use  
TE 294.2 K  
D1 1.00000000 sec  
TD0 1

===== CHANNEL f1 =====  
SF01 300.1318534 MHz  
NUC1 1H  
P1 12.80 use  
PLW1 9.57730007 W

F2 - Processing parameters  
SI 32768  
SF 300.1300064 MHz  
WDW EM  
SSB 0  
LB 0.30 Hz  
GB 0  
PC 1.00

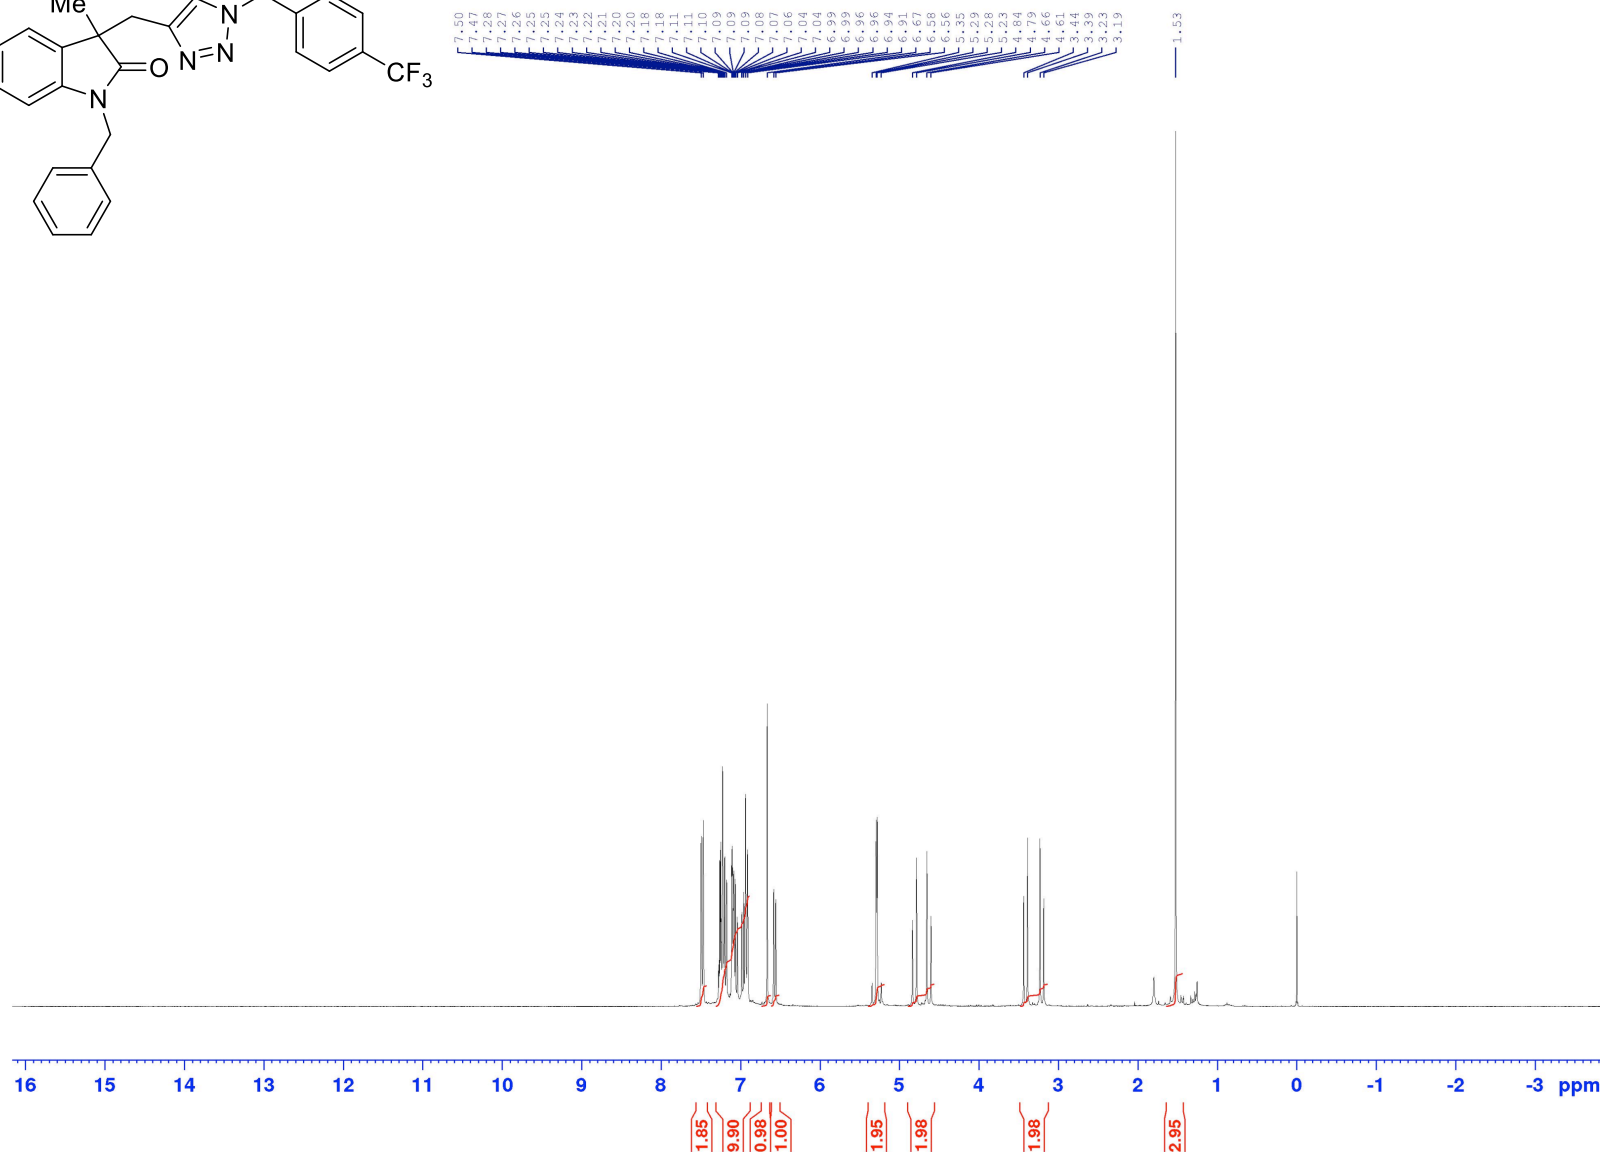

# <sup>13</sup>C NMR (2g)

WB C1-5

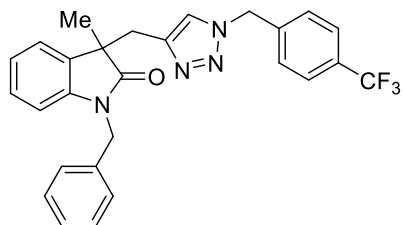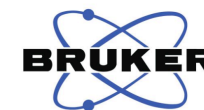

Current Data Parameters  
NAME 02-10-Fossey-23  
EXPNO 10  
PROCNO 1

F2 - Acquisition Parameters  
Date\_ 20150211  
Time 3.01  
INSTRUM spect  
PROBHD 5 mm PADUL 13C  
PULPROG udef  
TD 18178  
SOLVENT CDCl3  
NS 380  
DS 0  
SWH 25252.525 Hz  
FIDRES 1.389181 Hz  
AQ 0.3599244 sec  
RG 2050  
DW 19.800 use  
DE 8.20 use  
TE 293.2 K  
D1 3.00000000 sec  
D11 0.03000000 sec  
D12 0.00002000 sec  
D20 200.00000000 sec  
TD0 380

===== CHANNEL f1 =====  
SFO1 100.6242690 MHz  
NUC1 13C  
P1 8.80 use  
P13 2000.00 use  
P26 500.00 use  
PLW1 58.63899994 W  
SPNAM[5] Crp60comp.4  
SPOAL5 0.500  
SPOFFS5 0 Hz  
SPW5 6.93809986 W  
SPNAM[8] Crp60,0.5,20.1  
SPOAL8 0.500  
SPOFFS8 0 Hz  
SPW8 6.93809986 W

===== CHANNEL f2 =====  
SFO2 400.1320000 MHz  
NUC2 1H  
CPDPRG[2] waltz16  
PCPD2 90.00 use  
PLW2 24.29199982 W  
PLW12 0.28218001 W

F2 - Processing parameters  
SI 65536  
SF 100.6127690 MHz  
WDW EM  
SSB 0  
LB 2.00 Hz  
GB 0  
PC 1.00

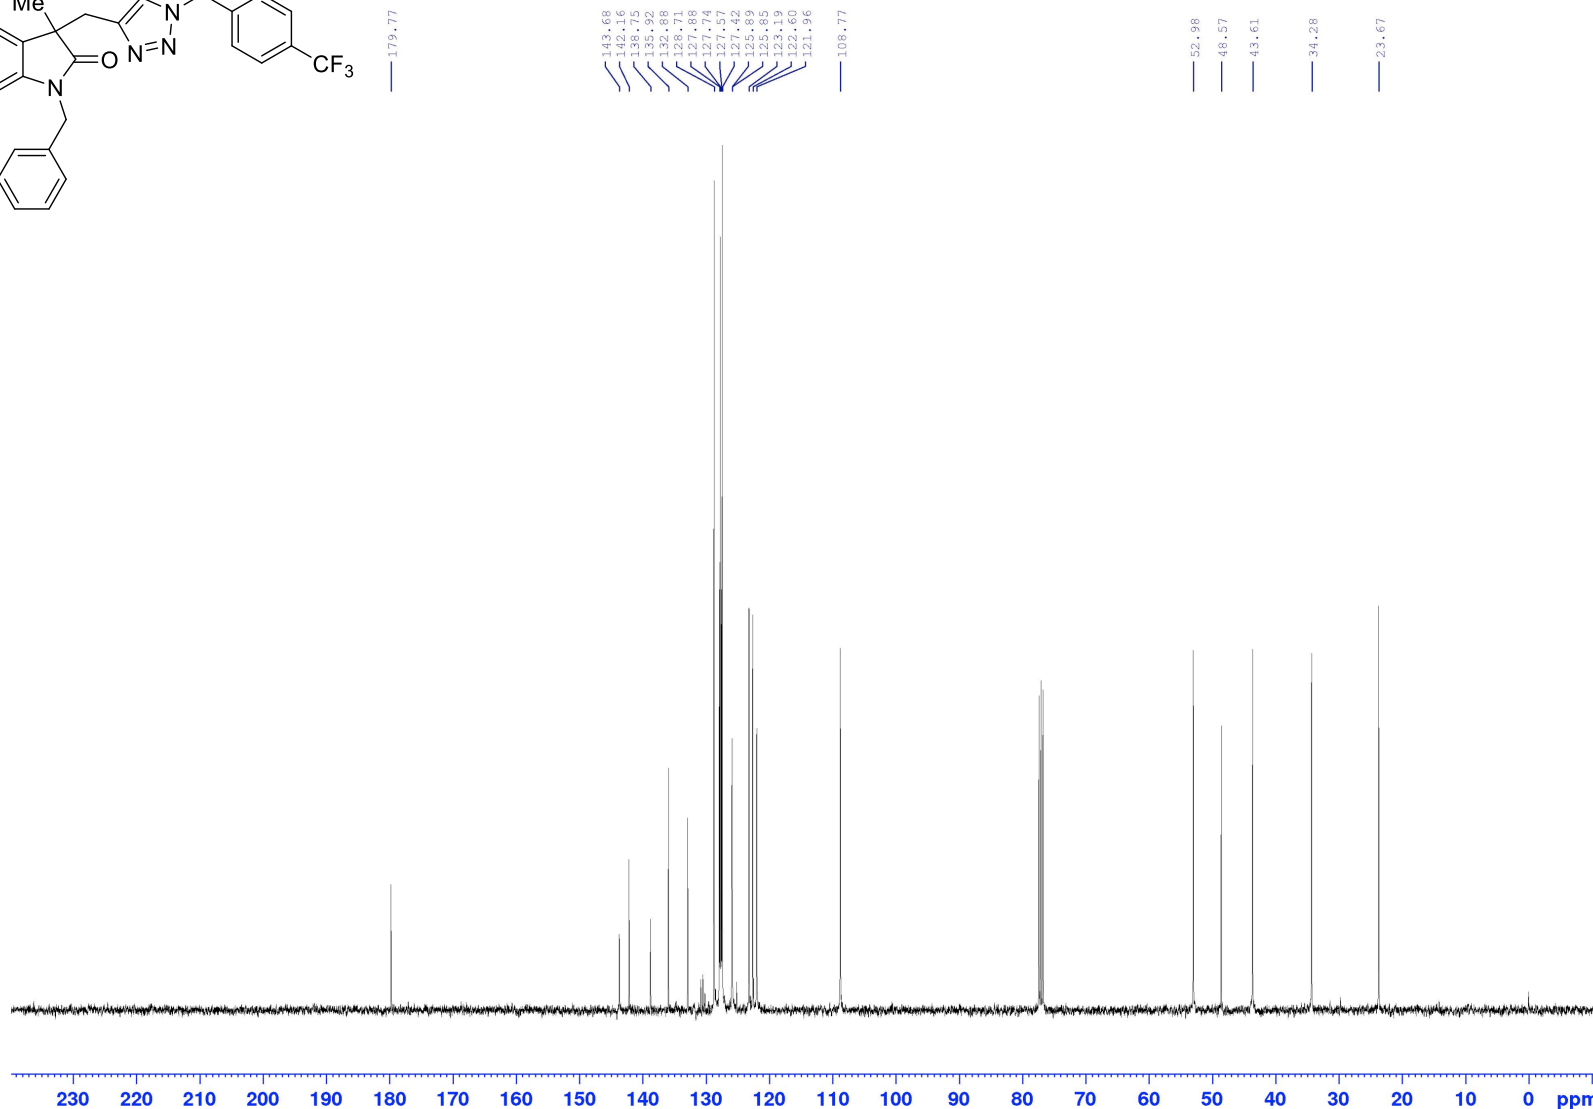

# <sup>19</sup>F NMR (2g)

WBC1-4

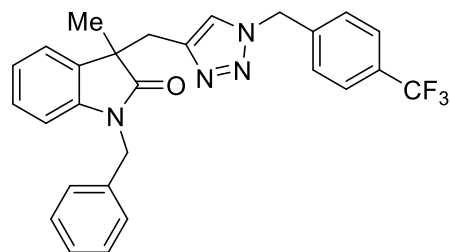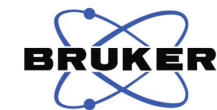

Current Data Parameters  
NAME 05-05-Fossey-7  
EXPNO 10  
PROCNO 1

F2 - Acquisition Parameters  
Date\_ 20150505  
Time 11.17  
INSTRUM spect  
PROBHD 5 mm PABBO BB-  
PULPROG zgig  
TD 131072  
SOLVENT CDCl<sub>3</sub>  
NS 32  
DS 4  
SWH 66964.289 Hz  
FIDRES 0.510897 Hz  
AQ 0.9786710 sec  
RG 456  
DW 7.467 use  
DE 7.27 use  
TE 294.2 K  
D1 3.00000000 sec  
D11 0.03000000 sec  
TD0 1

===== CHANNEL f1 =====  
SFO1 282.3823550 MHz  
NUC1 19F  
P1 8.70 use  
PLW1 30.58200073 W

===== CHANNEL f2 =====  
SFO2 300.1312005 MHz  
NUC2 1H  
CPDPRG[2] waltz16  
PCPD2 90.00 use  
PLW2 9.57730007 W  
PLW12 0.19372000 W

F2 - Processing parameters  
SI 131072  
SF 282.4043550 MHz  
WDW EM  
SSB 0  
LB 0.50 Hz  
GB 0  
PC 1.00

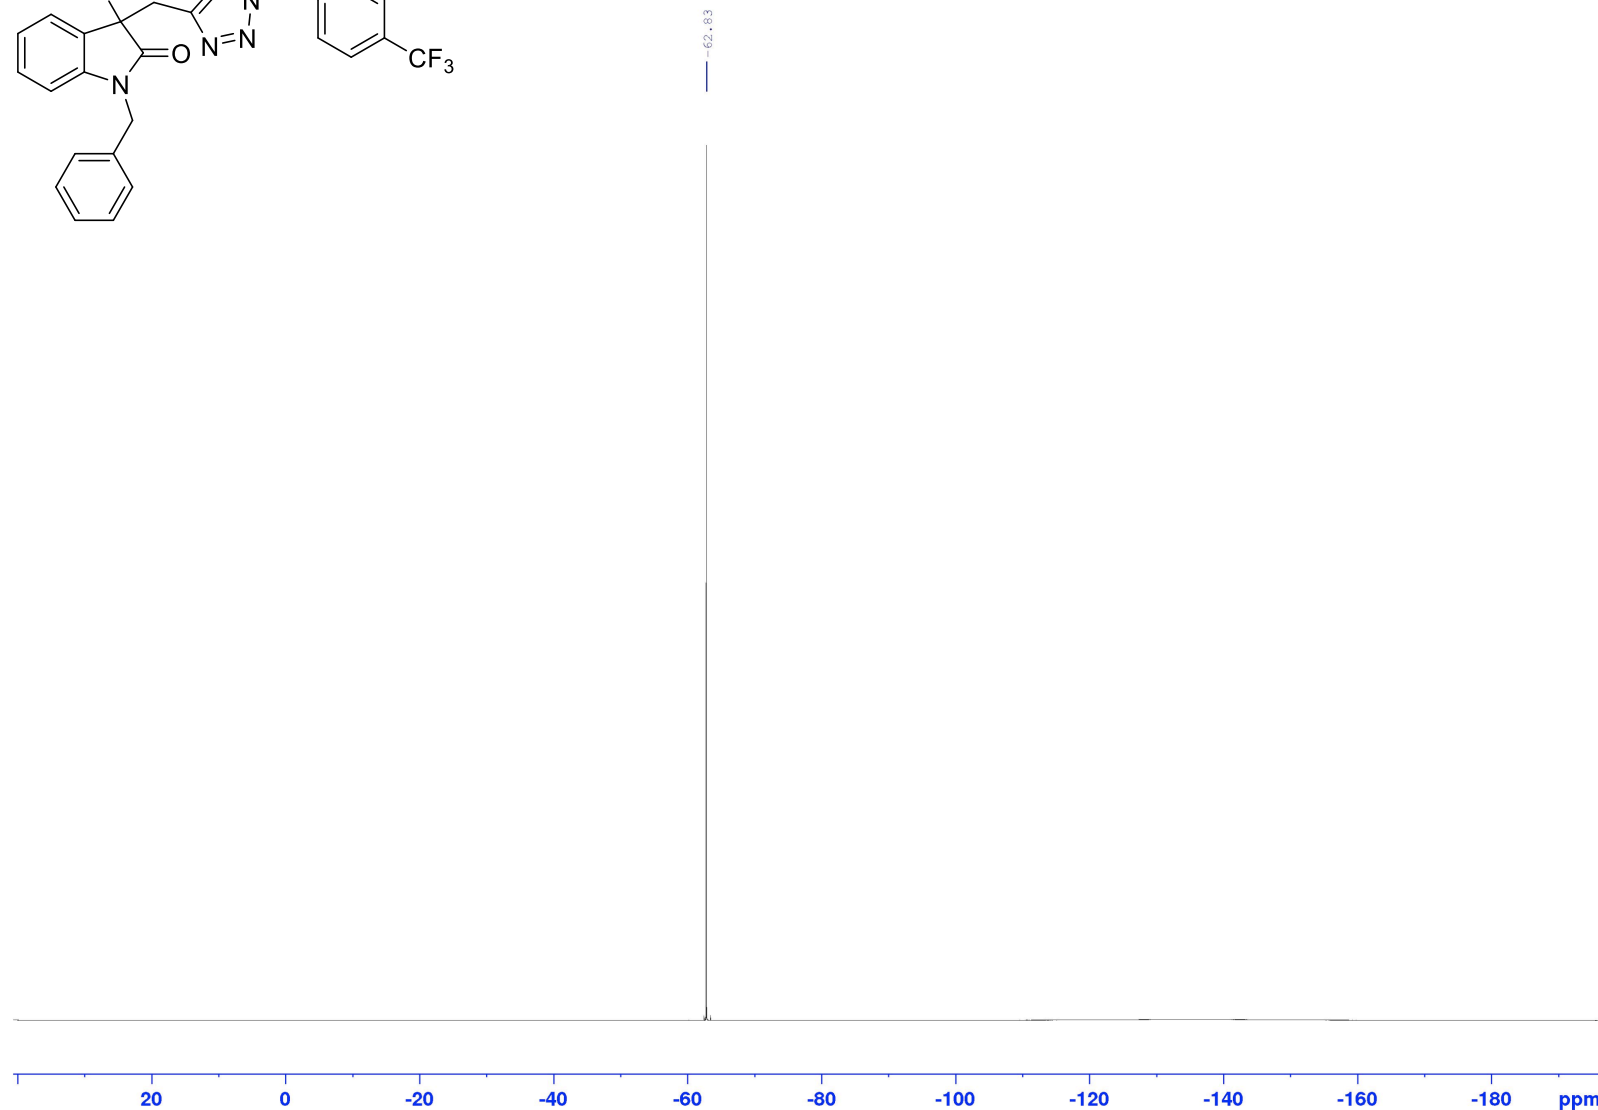



# HPLC Traces

Operator:Shimadzu Timebase:LC\_System1 Sequence:50%MeCN v 1

Page 1-1  
18/2/2015 3:48 PM

## 34 WB Bn SM

Cell-3 50% MeCN 50% water, 1ml/min

|                  |                 |                   |          |
|------------------|-----------------|-------------------|----------|
| Sample Name:     | WB Bn SM        | Injection Volume: | 10.0     |
| Vial Number:     | 1_2             | Channel:          | UV_VIS_3 |
| Sample Type:     | unknown         | Wavelength:       | n.a.     |
| Control Program: | 50% MeCN v 1    | Bandwidth:        | n.a.     |
| Quantif. Method: | 50% MeCN v 1    | Dilution Factor:  | 1.0000   |
| Recording Time:  | 28/8/2014 13:32 | Sample Weight:    | 1.0000   |
| Run Time (min):  | 20.01           | Sample Amount:    | 1.0000   |

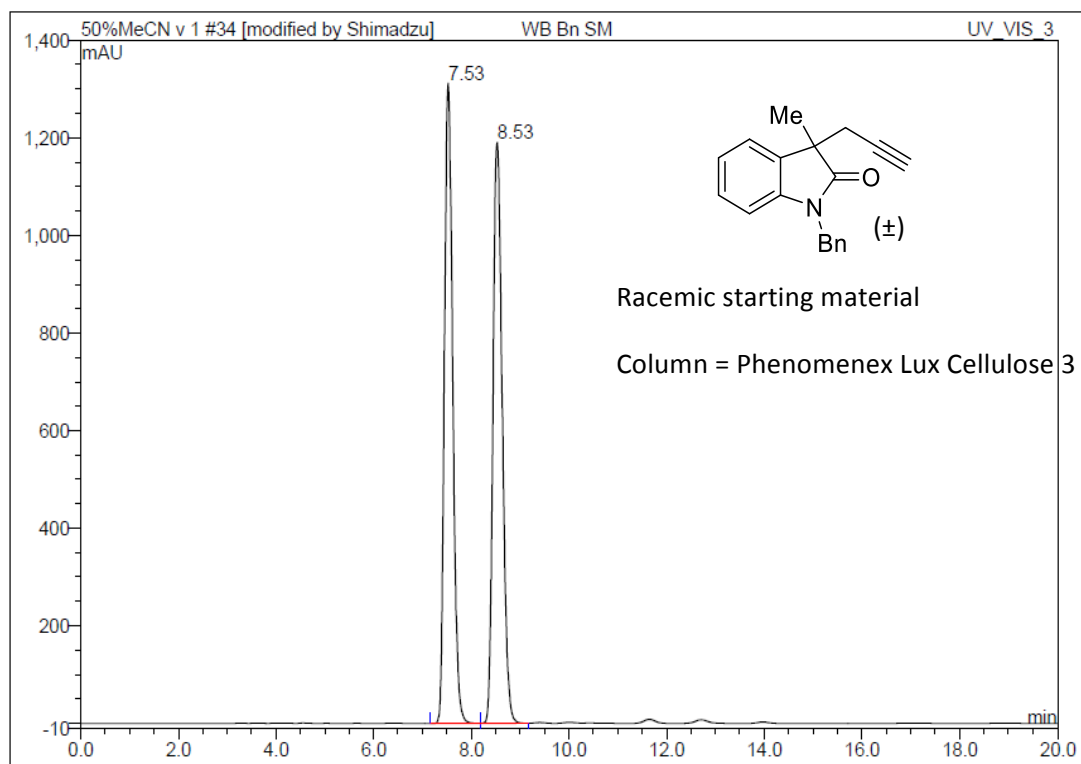

| No.    | Ret.Time<br>min | Peak Name | Height<br>mAU | Area<br>mAU*min | Rel.Area<br>% | Amount | Type |
|--------|-----------------|-----------|---------------|-----------------|---------------|--------|------|
| 1      | 7.53            | n.a.      | 1311.427      | 259.060         | 49.82         | n.a.   | BM   |
| 2      | 8.53            | n.a.      | 1189.898      | 260.893         | 50.18         | n.a.   | MB   |
| Total: |                 |           | 2501.325      | 519.952         | 100.00        | 0.000  |      |

**312 WB3-150-SM****50% MeCN 50% Water Cell-3, 1mL/min**

|                  |                 |                   |          |
|------------------|-----------------|-------------------|----------|
| Sample Name:     | WB3-150-SM      | Injection Volume: | 10.0     |
| Vial Number:     | 1_6             | Channel:          | UV_VIS_3 |
| Sample Type:     | unknown         | Wavelength:       | n.a.     |
| Control Program: | 50% MeCN v 1    | Bandwidth:        | n.a.     |
| Quantif. Method: | 50% MeCN v 1    | Dilution Factor:  | 1.0000   |
| Recording Time:  | 21/3/2015 19:35 | Sample Weight:    | 1.0000   |
| Run Time (min):  | 30.01           | Sample Amount:    | 1.0000   |

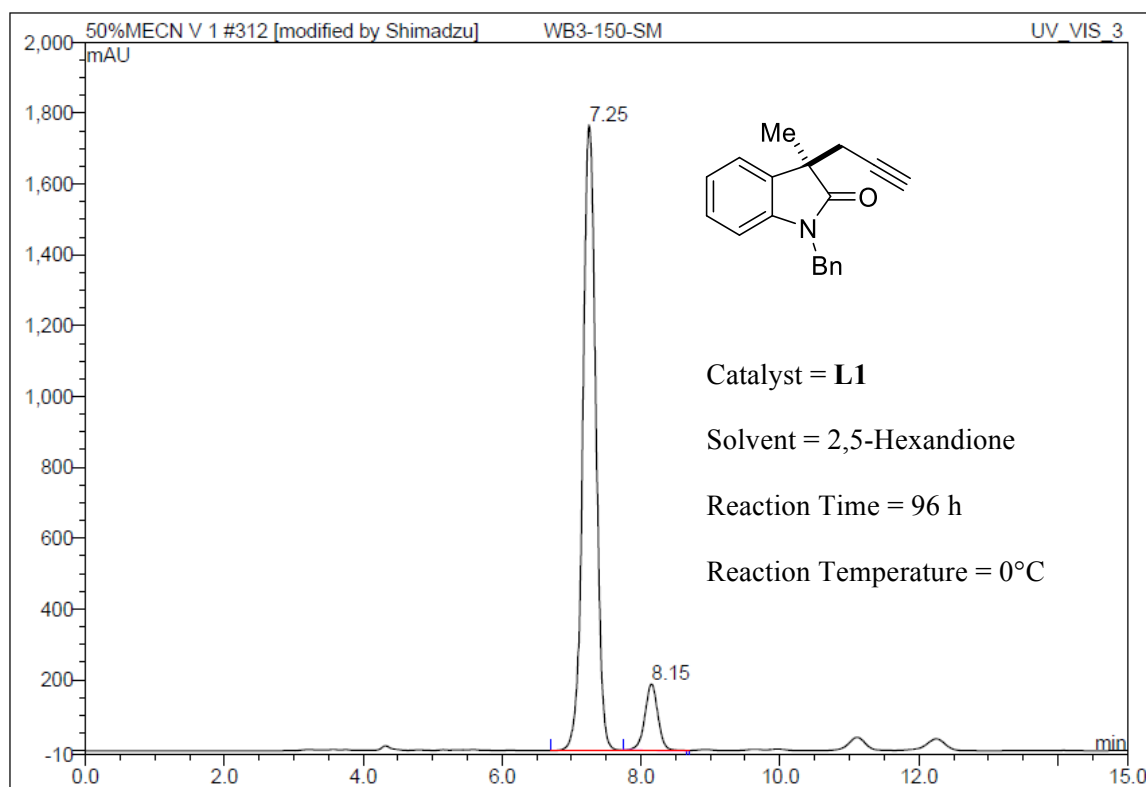

| No.    | Ret.Time<br>min | Peak Name | Height<br>mAU | Area<br>mAU*min | Rel.Area<br>% | Amount | Type |
|--------|-----------------|-----------|---------------|-----------------|---------------|--------|------|
| 1      | 7.25            | n.a.      | 1765.969      | 383.333         | 90.40         | n.a.   | BMB  |
| 2      | 8.15            | n.a.      | 186.806       | 40.689          | 9.60          | n.a.   | Rd   |
| Total: |                 |           | 1952.775      | 424.023         | 100.00        | 0.000  |      |

**40 WB2-38 SM****Cell-3 50% MeCN 50% water, 1ml/min**

|                  |                 |                   |          |
|------------------|-----------------|-------------------|----------|
| Sample Name:     | WB2-38 SM       | Injection Volume: | 10.0     |
| Vial Number:     | 1_7             | Channel:          | UV_VIS_3 |
| Sample Type:     | unknown         | Wavelength:       | n.a.     |
| Control Program: | 50% MeCN v 1    | Bandwidth:        | n.a.     |
| Quantif. Method: | 50% MeCN v 1    | Dilution Factor:  | 1.0000   |
| Recording Time:  | 28/8/2014 17:27 | Sample Weight:    | 1.0000   |
| Run Time (min):  | 15.01           | Sample Amount:    | 1.0000   |

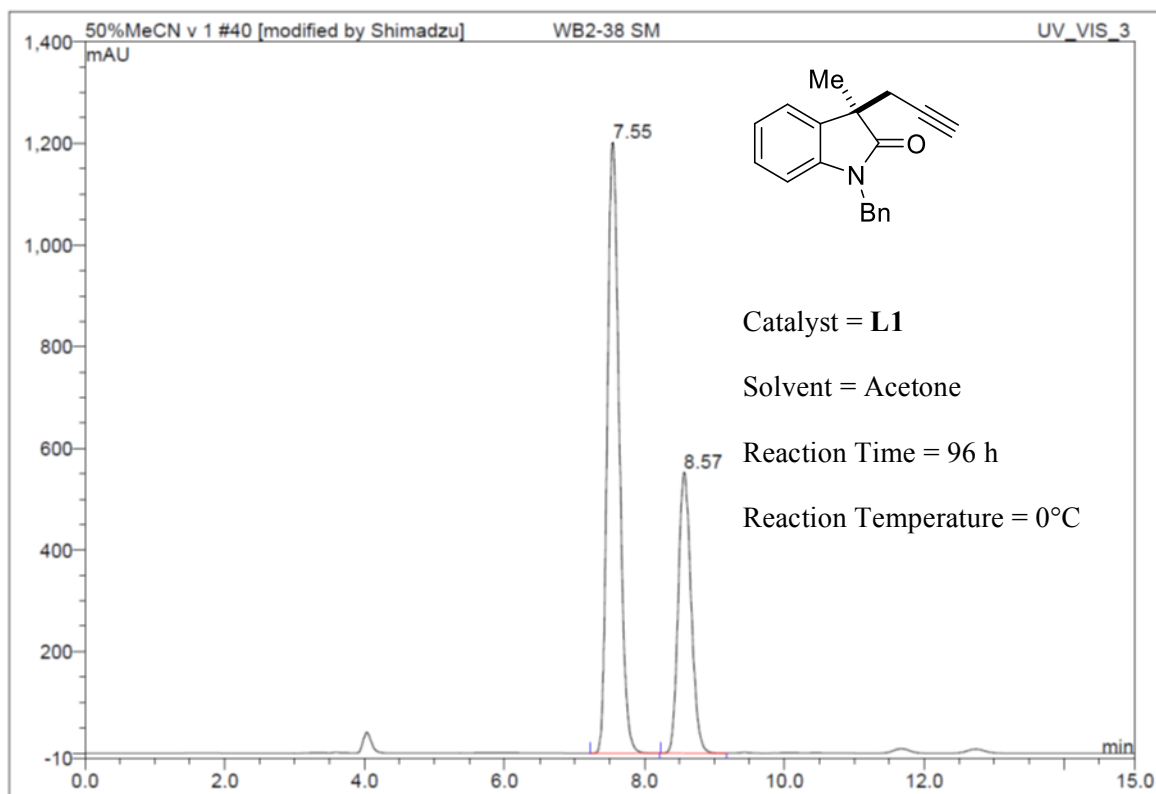

| No.    | Ret.Time<br>min | Peak Name | Height<br>mAU | Area<br>mAU*min | Rel.Area<br>% | Amount | Type |
|--------|-----------------|-----------|---------------|-----------------|---------------|--------|------|
| 1      | 7.55            | n.a.      | 1201.675      | 237.272         | 66.78         | n.a.   | BMB  |
| 2      | 8.57            | n.a.      | 552.682       | 118.011         | 33.22         | n.a.   | BMB  |
| Total: |                 |           | 1754.357      | 355.283         | 100.00        | 0.000  |      |

**41 WB2-39 SM****Cell-3 50% MeCN 50% water, 1ml/min**

|                  |                 |                   |          |
|------------------|-----------------|-------------------|----------|
| Sample Name:     | WB2-39 SM       | Injection Volume: | 10.0     |
| Vial Number:     | 1_8             | Channel:          | UV_VIS_3 |
| Sample Type:     | unknown         | Wavelength:       | n.a.     |
| Control Program: | 50% MeCN v 1    | Bandwidth:        | n.a.     |
| Quantif. Method: | 50% MeCN v 1    | Dilution Factor:  | 1.0000   |
| Recording Time:  | 28/8/2014 17:42 | Sample Weight:    | 1.0000   |
| Run Time (min):  | 15.01           | Sample Amount:    | 1.0000   |

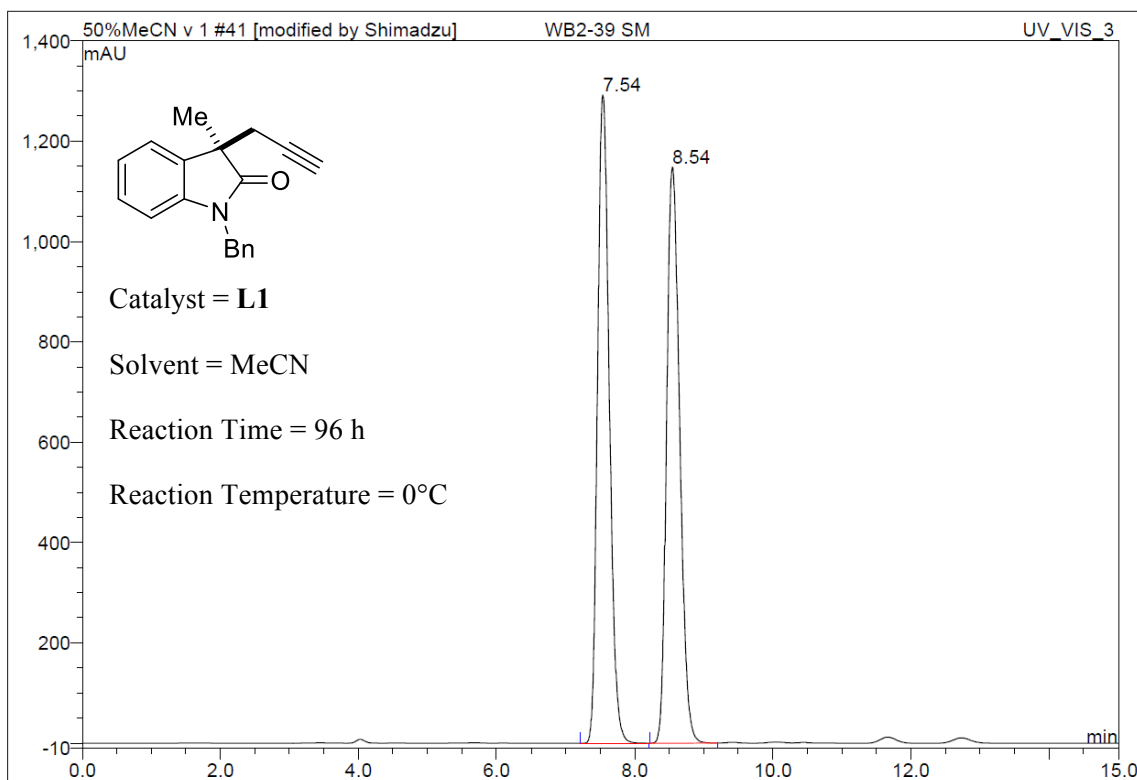

| No.    | Ret.Time<br>min | Peak Name | Height<br>mAU | Area<br>mAU*min | Rel.Area<br>% | Amount | Type |
|--------|-----------------|-----------|---------------|-----------------|---------------|--------|------|
| 1      | 7.54            | n.a.      | 1292.113      | 255.822         | 50.39         | n.a.   | BMB  |
| 2      | 8.54            | n.a.      | 1148.354      | 251.902         | 49.61         | n.a.   | BMB  |
| Total: |                 |           | 2440.467      | 507.724         | 100.00        | 0.000  |      |

**38 WB2-41 SM****Cell-3 50% MeCN 50% water, 1ml/min**

|                  |                 |                   |          |
|------------------|-----------------|-------------------|----------|
| Sample Name:     | WB2-41 SM       | Injection Volume: | 10.0     |
| Vial Number:     | 1_5             | Channel:          | UV_VIS_3 |
| Sample Type:     | unknown         | Wavelength:       | n.a.     |
| Control Program: | 50% MeCN v 1    | Bandwidth:        | n.a.     |
| Quantif. Method: | 50% MeCN v 1    | Dilution Factor:  | 1.0000   |
| Recording Time:  | 28/8/2014 16:56 | Sample Weight:    | 1.0000   |
| Run Time (min):  | 15.01           | Sample Amount:    | 1.0000   |

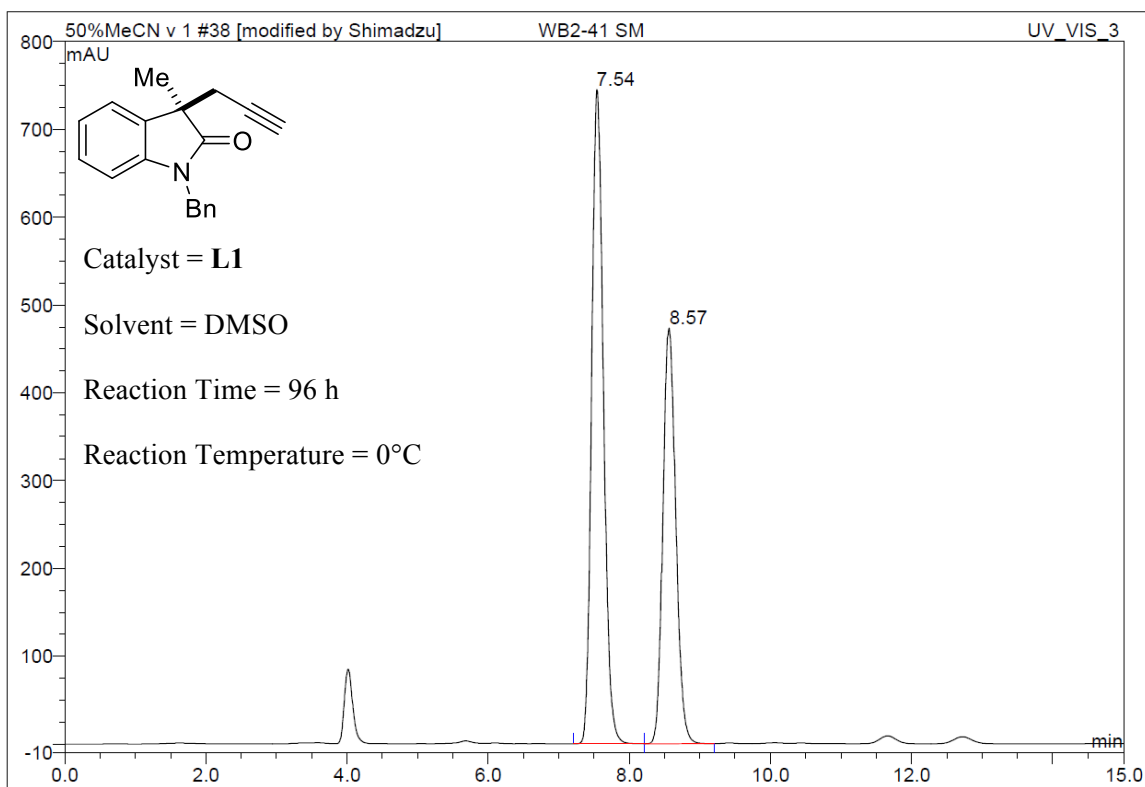

| No.    | Ret.Time<br>min | Peak Name | Height<br>mAU | Area<br>mAU*min | Rel.Area<br>% | Amount | Type |
|--------|-----------------|-----------|---------------|-----------------|---------------|--------|------|
| 1      | 7.54            | n.a.      | 744.701       | 144.062         | 58.88         | n.a.   | BMB  |
| 2      | 8.57            | n.a.      | 473.317       | 100.598         | 41.12         | n.a.   | BMB  |
| Total: |                 |           | 1218.018      | 244.660         | 100.00        | 0.000  |      |

**43 WB2-42 SM****Cell-3 50% MeCN 50% water, 1ml/min**

|                  |                 |                   |          |
|------------------|-----------------|-------------------|----------|
| Sample Name:     | WB2-42 SM       | Injection Volume: | 10.0     |
| Vial Number:     | 1_10            | Channel:          | UV_VIS_3 |
| Sample Type:     | unknown         | Wavelength:       | n.a.     |
| Control Program: | 50% MeCN v 1    | Bandwidth:        | n.a.     |
| Quantif. Method: | 50% MeCN v 1    | Dilution Factor:  | 1.0000   |
| Recording Time:  | 28/8/2014 18:13 | Sample Weight:    | 1.0000   |
| Run Time (min):  | 15.01           | Sample Amount:    | 1.0000   |

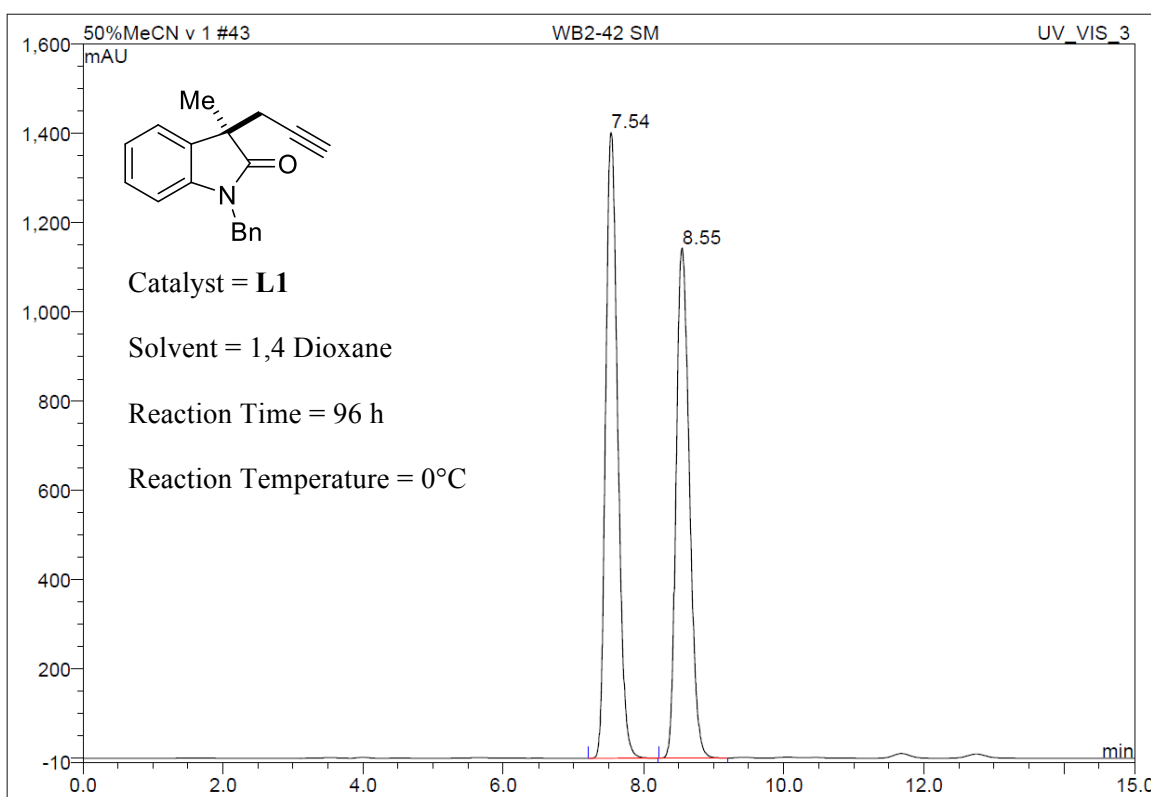

| No.    | Ret.Time<br>min | Peak Name | Height<br>mAU | Area<br>mAU*min | Rel.Area<br>% | Amount | Type |
|--------|-----------------|-----------|---------------|-----------------|---------------|--------|------|
| 1      | 7.54            | n.a.      | 1402.586      | 279.975         | 52.77         | n.a.   | BMB  |
| 2      | 8.55            | n.a.      | 1143.103      | 250.542         | 47.23         | n.a.   | BMB  |
| Total: |                 |           | 2545.689      | 530.518         | 100.00        | 0.000  |      |

**37 WB2-43 SM****Cell-3 50% MeCN 50% water, 1ml/min**

|                  |                 |                   |          |
|------------------|-----------------|-------------------|----------|
| Sample Name:     | WB2-43 SM       | Injection Volume: | 10.0     |
| Vial Number:     | 1_4             | Channel:          | UV_VIS_3 |
| Sample Type:     | unknown         | Wavelength:       | n.a.     |
| Control Program: | 50% MeCN v 1    | Bandwidth:        | n.a.     |
| Quantif. Method: | 50% MeCN v 1    | Dilution Factor:  | 1.0000   |
| Recording Time:  | 28/8/2014 16:40 | Sample Weight:    | 1.0000   |
| Run Time (min):  | 15.01           | Sample Amount:    | 1.0000   |

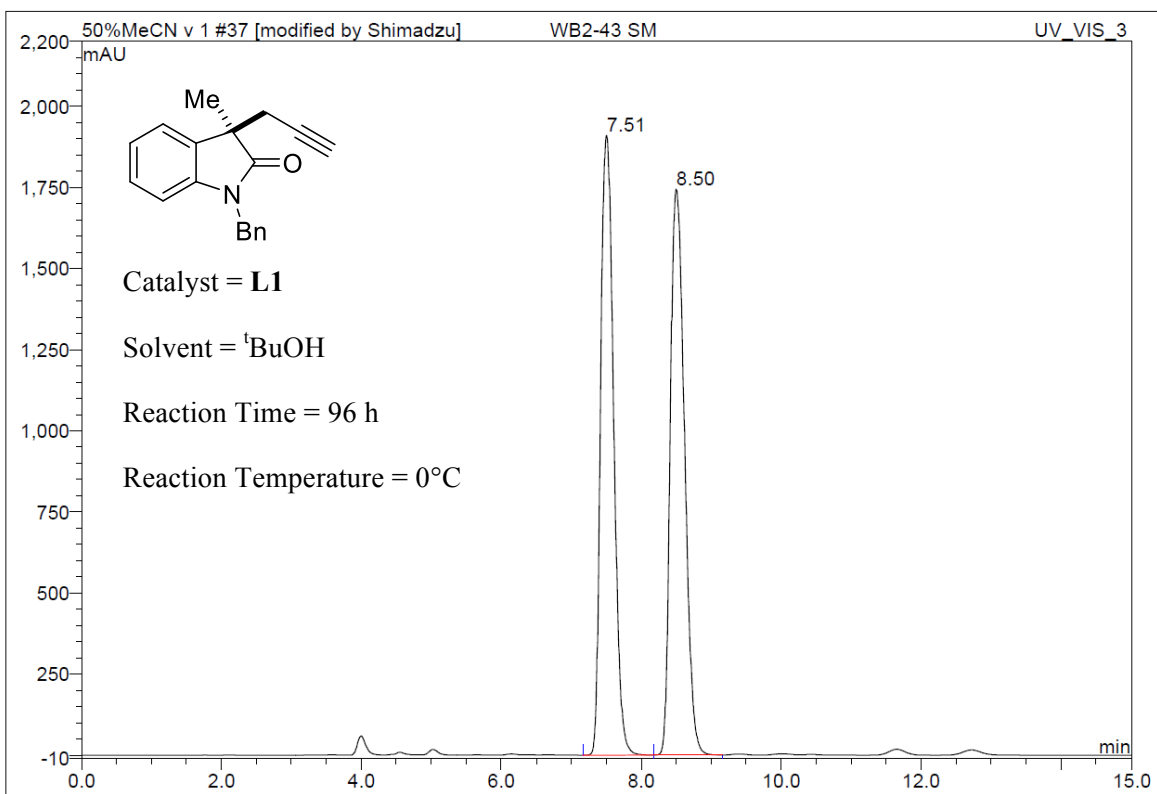

| No.    | Ret.Time<br>min | Peak Name | Height<br>mAU | Area<br>mAU*min | Rel.Area<br>% | Amount | Type |
|--------|-----------------|-----------|---------------|-----------------|---------------|--------|------|
| 1      | 7.51            | n.a.      | 1909.535      | 410.489         | 49.99         | n.a.   | BMB  |
| 2      | 8.50            | n.a.      | 1743.787      | 410.719         | 50.01         | n.a.   | BMB  |
| Total: |                 |           | 3653.322      | 821.208         | 100.00        | 0.000  |      |

**36 WB2-44 SM****Cell-3 50% MeCN 50% water, 1ml/min**

Sample Name: **WB2-44 SM**  
Vial Number: **1\_3**  
Sample Type: **unknown**  
Control Program: **50% MeCN v 1**  
Quantif. Method: **50% MeCN v 1**  
Recording Time: **28/8/2014 16:25**  
Run Time (min): **15.01**

Injection Volume: **10.0**  
Channel: **UV\_VIS\_3**  
Wavelength: **n.a.**  
Bandwidth: **n.a.**  
Dilution Factor: **1.0000**  
Sample Weight: **1.0000**  
Sample Amount: **1.0000**

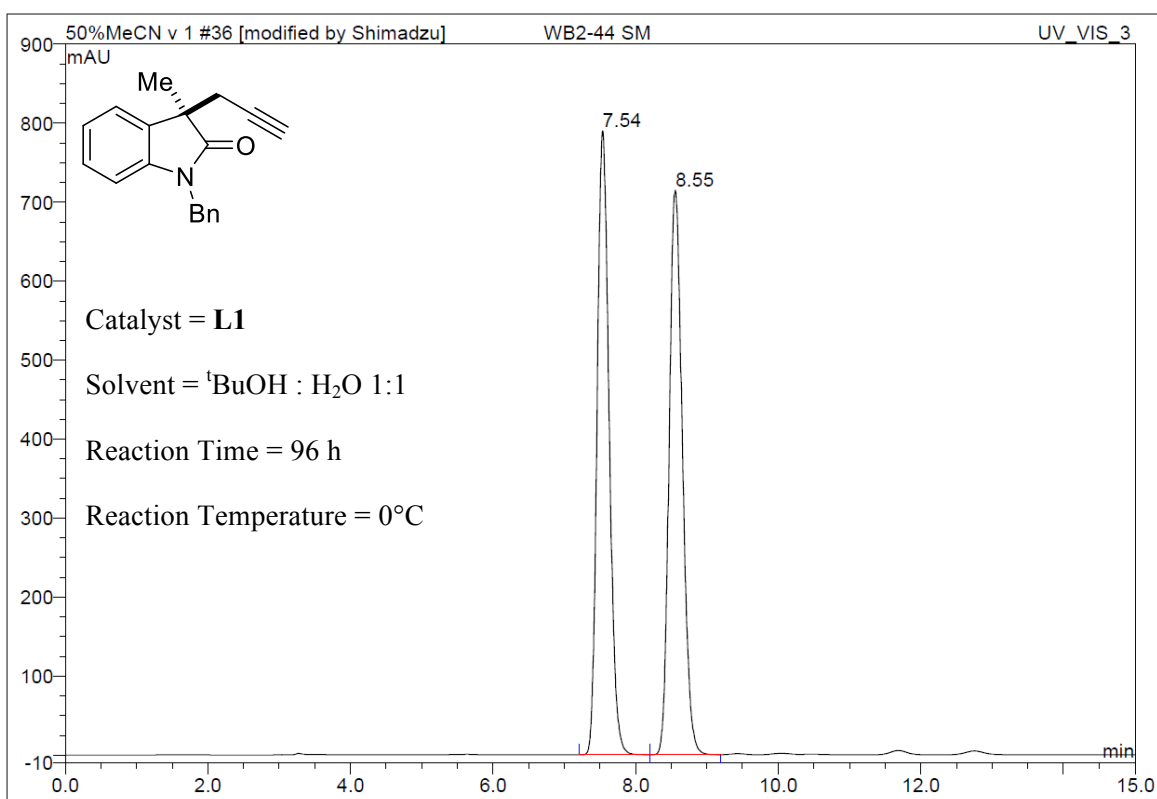

| No.    | Ret.Time<br>min | Peak Name | Height<br>mAU | Area<br>mAU*min | Rel.Area<br>% | Amount | Type |
|--------|-----------------|-----------|---------------|-----------------|---------------|--------|------|
| 1      | 7.54            | n.a.      | 789.896       | 153.679         | 49.93         | n.a.   | BM   |
| 2      | 8.55            | n.a.      | 714.878       | 154.083         | 50.07         | n.a.   | MB   |
| Total: |                 |           | 1504.774      | 307.762         | 100.00        | 0.000  |      |



**42 WB2-48 SM****Cell-3 50% MeCN 50% water, 1ml/min**

|                  |                 |                   |          |
|------------------|-----------------|-------------------|----------|
| Sample Name:     | WB2-48 SM       | Injection Volume: | 10.0     |
| Vial Number:     | 1_9             | Channel:          | UV_VIS_3 |
| Sample Type:     | unknown         | Wavelength:       | n.a.     |
| Control Program: | 50% MeCN v 1    | Bandwidth:        | n.a.     |
| Quantif. Method: | 50% MeCN v 1    | Dilution Factor:  | 1.0000   |
| Recording Time:  | 28/8/2014 17:58 | Sample Weight:    | 1.0000   |
| Run Time (min):  | 15.01           | Sample Amount:    | 1.0000   |

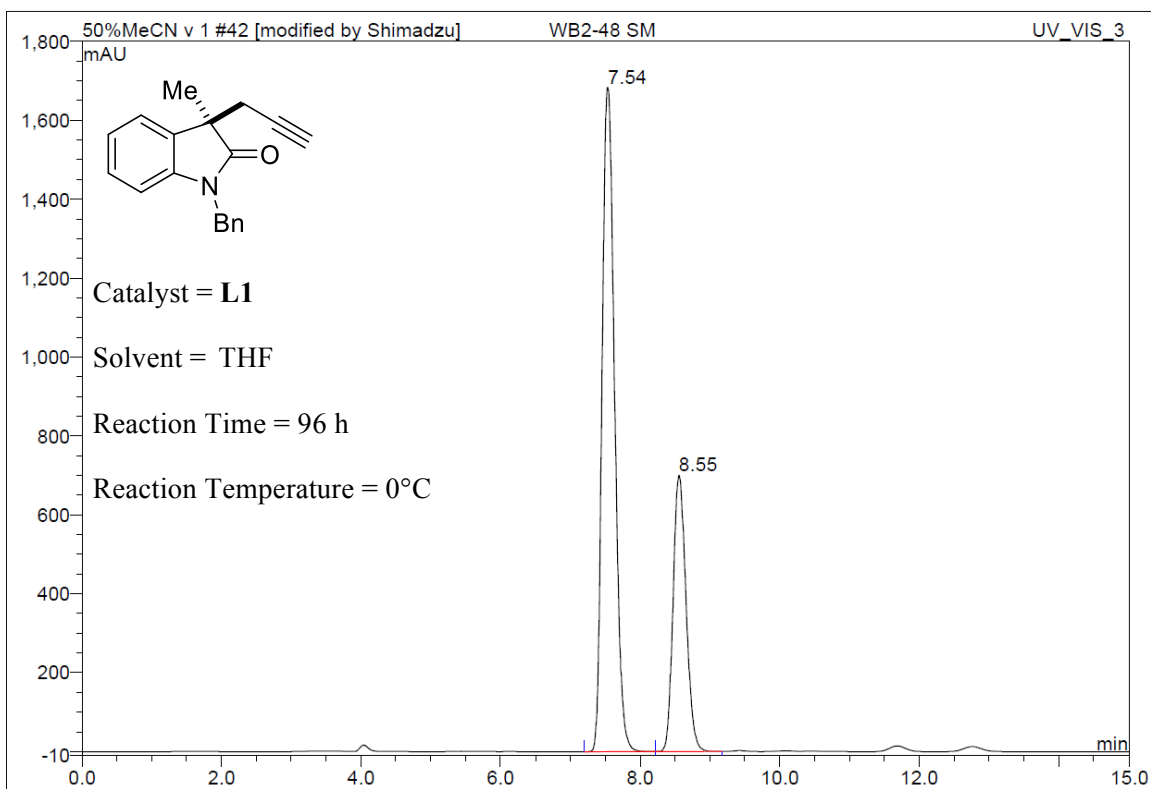

| No.    | Ret.Time<br>min | Peak Name | Height<br>mAU | Area<br>mAU*min | Rel.Area<br>% | Amount | Type |
|--------|-----------------|-----------|---------------|-----------------|---------------|--------|------|
| 1      | 7.54            | n.a.      | 1683.354      | 347.246         | 69.75         | n.a.   | BM   |
| 2      | 8.55            | n.a.      | 699.790       | 150.579         | 30.25         | n.a.   | MB   |
| Total: |                 |           | 2383.144      | 497.824         | 100.00        | 0.000  |      |

**35 WB2-54 SM****Cell-3 50% MeCN 50% water, 1ml/min**

|                  |                 |                   |          |
|------------------|-----------------|-------------------|----------|
| Sample Name:     | WB2-54 SM       | Injection Volume: | 10.0     |
| Vial Number:     | 1_2             | Channel:          | UV_VIS_3 |
| Sample Type:     | unknown         | Wavelength:       | n.a.     |
| Control Program: | 50% MeCN v 1    | Bandwidth:        | n.a.     |
| Quantif. Method: | 50% MeCN v 1    | Dilution Factor:  | 1.0000   |
| Recording Time:  | 28/8/2014 16:09 | Sample Weight:    | 1.0000   |
| Run Time (min):  | 15.01           | Sample Amount:    | 1.0000   |

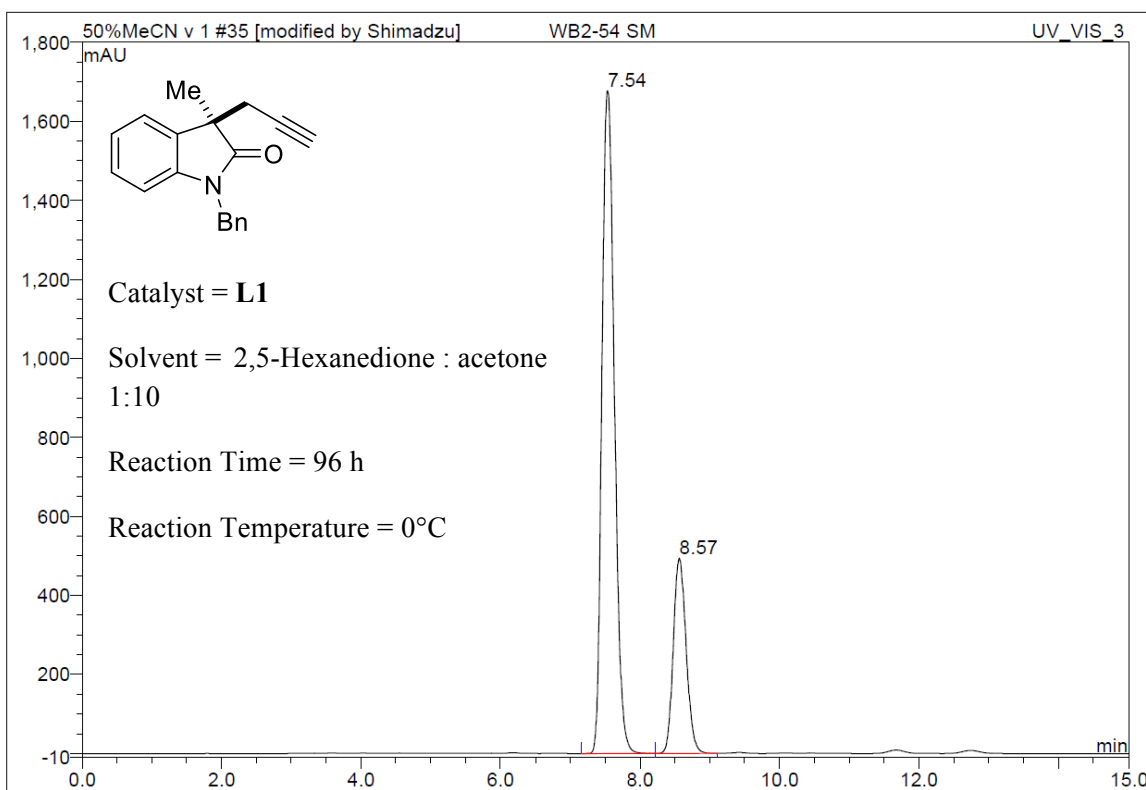

| No.    | Ret.Time<br>min | Peak Name | Height<br>mAU | Area<br>mAU*min | Rel.Area<br>% | Amount | Type |
|--------|-----------------|-----------|---------------|-----------------|---------------|--------|------|
| 1      | 7.54            | n.a.      | 1677.147      | 346.774         | 76.67         | n.a.   | BM   |
| 2      | 8.57            | n.a.      | 494.037       | 105.495         | 23.33         | n.a.   | MB   |
| Total: |                 |           | 2171.184      | 452.270         | 100.00        | 0.000  |      |

**56 WB2-61 SM****Cell-3 50% MeCN 50% water, 1ml/min**

Sample Name: **WB2-61 SM**  
Vial Number: **1\_23**  
Sample Type: **unknown**  
Control Program: **50% MeCN v 1**  
Quantif. Method: **50% MeCN v 1**  
Recording Time: **28/8/2014 21:34**  
Run Time (min): **15.01**

Injection Volume: **10.0**  
Channel: **UV\_VIS\_3**  
Wavelength: **n.a.**  
Bandwidth: **n.a.**  
Dilution Factor: **1.0000**  
Sample Weight: **1.0000**  
Sample Amount: **1.0000**

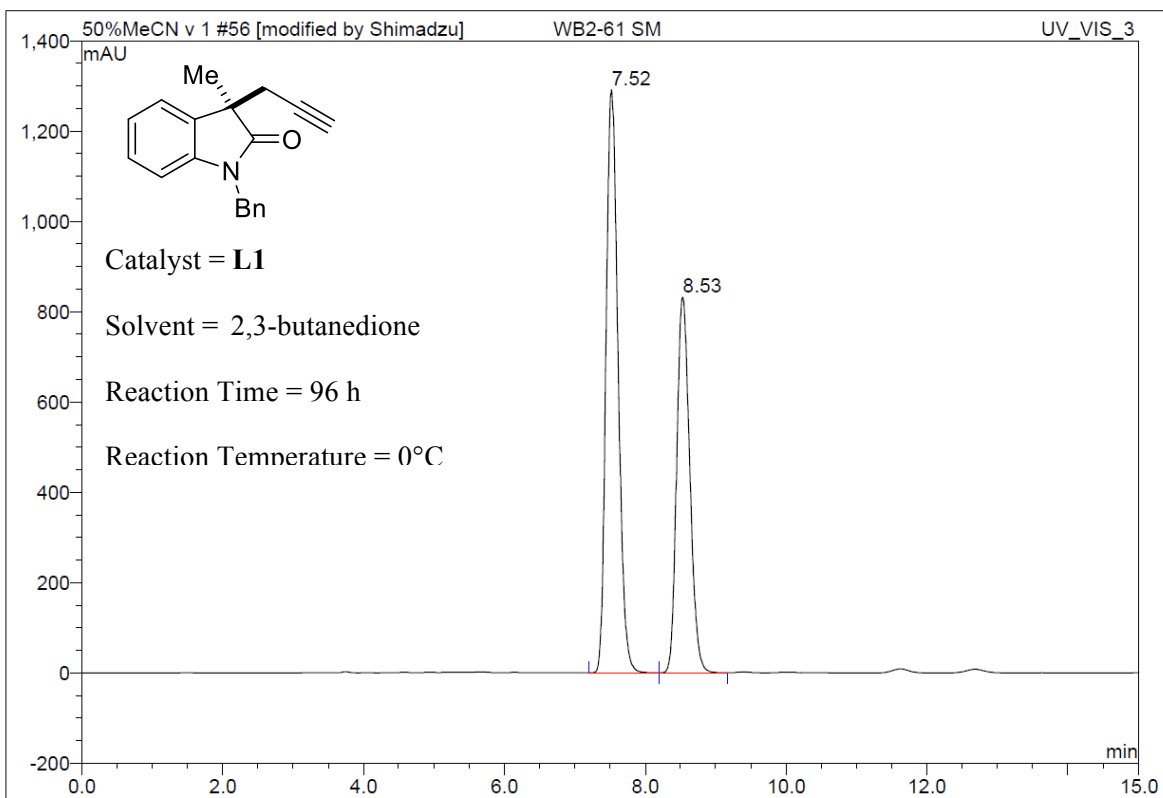

| No.    | Ret.Time<br>min | Peak Name | Height<br>mAU | Area<br>mAU*min | Rel.Area<br>% | Amount | Type |
|--------|-----------------|-----------|---------------|-----------------|---------------|--------|------|
| 1      | 7.52            | n.a.      | 1291.017      | 254.967         | 58.77         | n.a.   | BMB  |
| 2      | 8.53            | n.a.      | 832.046       | 178.870         | 41.23         | n.a.   | BMB  |
| Total: |                 |           | 2123.063      | 433.837         | 100.00        | 0.000  |      |

**57 WB2-69 SM****Cell-3 50% MeCN 50% water, 1ml/min**

|                  |                 |                   |          |
|------------------|-----------------|-------------------|----------|
| Sample Name:     | WB2-69 SM       | Injection Volume: | 10.0     |
| Vial Number:     | 1_24            | Channel:          | UV_VIS_3 |
| Sample Type:     | unknown         | Wavelength:       | n.a.     |
| Control Program: | 50% MeCN v 1    | Bandwidth:        | n.a.     |
| Quantif. Method: | 50% MeCN v 1    | Dilution Factor:  | 1.0000   |
| Recording Time:  | 28/8/2014 21:49 | Sample Weight:    | 1.0000   |
| Run Time (min):  | 15.01           | Sample Amount:    | 1.0000   |

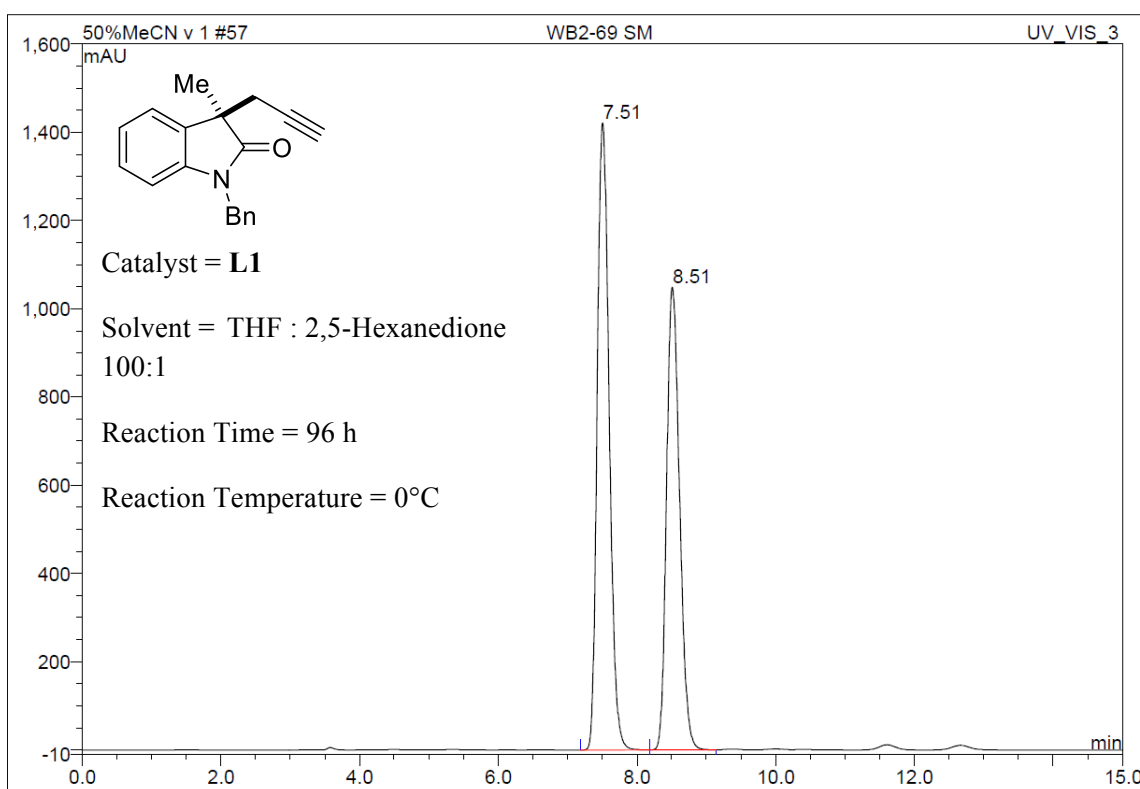

| No.    | Ret.Time<br>min | Peak Name | Height<br>mAU | Area<br>mAU*min | Rel.Area<br>% | Amount | Type |
|--------|-----------------|-----------|---------------|-----------------|---------------|--------|------|
| 1      | 7.51            | n.a.      | 1421.375      | 283.815         | 55.45         | n.a.   | BM   |
| 2      | 8.51            | n.a.      | 1049.278      | 228.023         | 44.55         | n.a.   | MB   |
| Total: |                 |           | 2470.653      | 511.838         | 100.00        | 0.000  |      |

**55 WB2-71 SM****Cell-3 50% MeCN 50% water, 1ml/min**

|                  |                 |                   |          |
|------------------|-----------------|-------------------|----------|
| Sample Name:     | WB2-71 SM       | Injection Volume: | 10.0     |
| Vial Number:     | 1_22            | Channel:          | UV_VIS_3 |
| Sample Type:     | unknown         | Wavelength:       | n.a.     |
| Control Program: | 50% MeCN v 1    | Bandwidth:        | n.a.     |
| Quantif. Method: | 50% MeCN v 1    | Dilution Factor:  | 1.0000   |
| Recording Time:  | 28/8/2014 21:18 | Sample Weight:    | 1.0000   |
| Run Time (min):  | 15.01           | Sample Amount:    | 1.0000   |

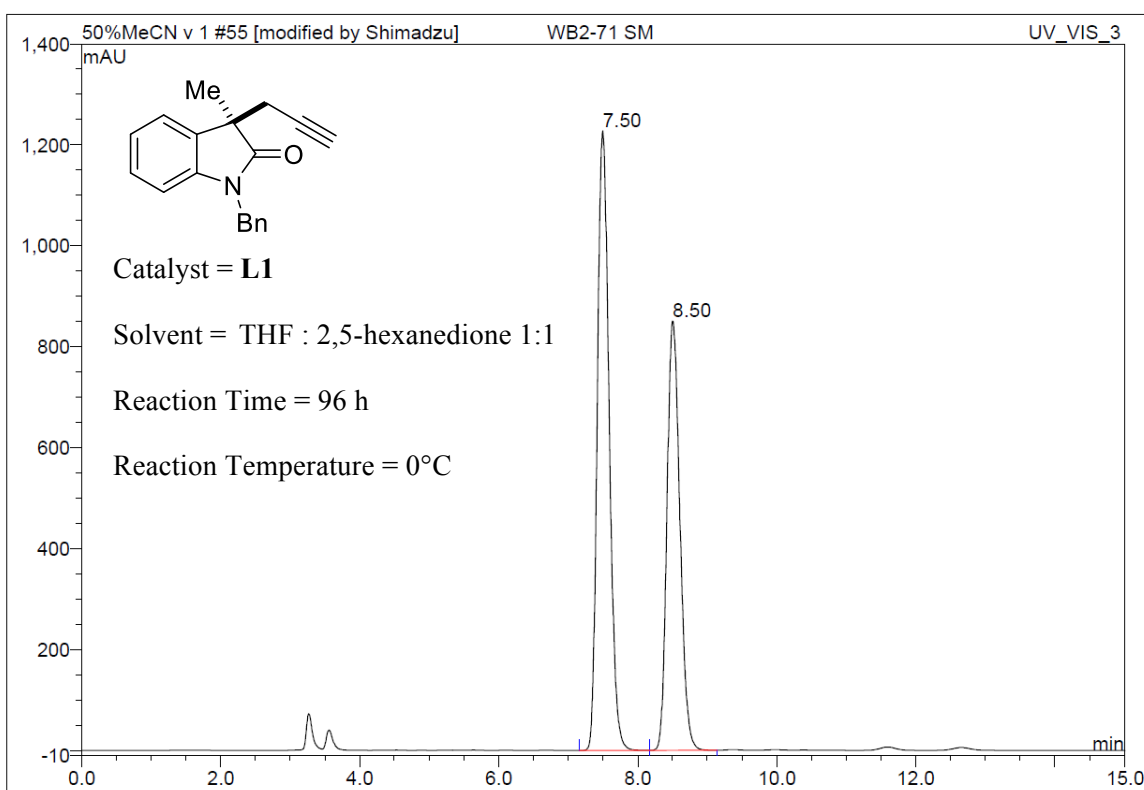

| No.    | Ret.Time<br>min | Peak Name | Height<br>mAU | Area<br>mAU*min | Rel.Area<br>% | Amount | Type |
|--------|-----------------|-----------|---------------|-----------------|---------------|--------|------|
| 1      | 7.50            | n.a.      | 1227.367      | 241.604         | 56.90         | n.a.   | BM   |
| 2      | 8.50            | n.a.      | 850.574       | 182.997         | 43.10         | n.a.   | MB   |
| Total: |                 |           | 2077.941      | 424.601         | 100.00        | 0.000  |      |

**44 WB2-77 SM****Cell-3 50% MeCN 50% water, 1ml/min**

|                  |                 |                   |          |
|------------------|-----------------|-------------------|----------|
| Sample Name:     | WB2-77 SM       | Injection Volume: | 10.0     |
| Vial Number:     | 1_11            | Channel:          | UV_VIS_3 |
| Sample Type:     | unknown         | Wavelength:       | n.a.     |
| Control Program: | 50% MeCN v 1    | Bandwidth:        | n.a.     |
| Quantif. Method: | 50% MeCN v 1    | Dilution Factor:  | 1.0000   |
| Recording Time:  | 28/8/2014 18:28 | Sample Weight:    | 1.0000   |
| Run Time (min):  | 15.01           | Sample Amount:    | 1.0000   |

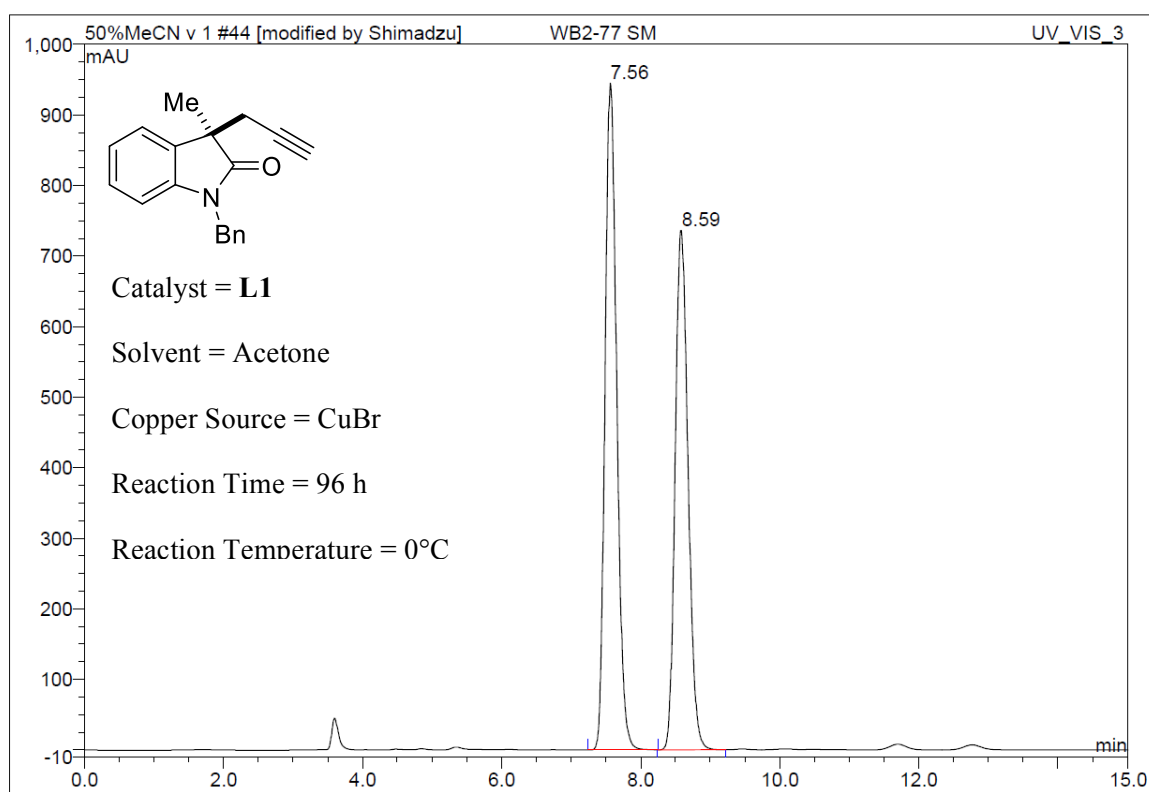

| No.    | Ret.Time<br>min | Peak Name | Height<br>mAU | Area<br>mAU*min | Rel.Area<br>% | Amount | Type |
|--------|-----------------|-----------|---------------|-----------------|---------------|--------|------|
| 1      | 7.56            | n.a.      | 944.956       | 184.013         | 53.77         | n.a.   | BMB  |
| 2      | 8.59            | n.a.      | 736.171       | 158.200         | 46.23         | n.a.   | BMB  |
| Total: |                 |           | 1681.127      | 342.213         | 100.00        | 0.000  |      |

**51 WB2-80 SM****Cell-3 50% MeCN 50% water, 1ml/min**

|                  |                 |                   |          |
|------------------|-----------------|-------------------|----------|
| Sample Name:     | WB2-80 SM       | Injection Volume: | 10.0     |
| Vial Number:     | 1_18            | Channel:          | UV_VIS_3 |
| Sample Type:     | unknown         | Wavelength:       | n.a.     |
| Control Program: | 50% MeCN v 1    | Bandwidth:        | n.a.     |
| Quantif. Method: | 50% MeCN v 1    | Dilution Factor:  | 1.0000   |
| Recording Time:  | 28/8/2014 20:17 | Sample Weight:    | 1.0000   |
| Run Time (min):  | 15.01           | Sample Amount:    | 1.0000   |

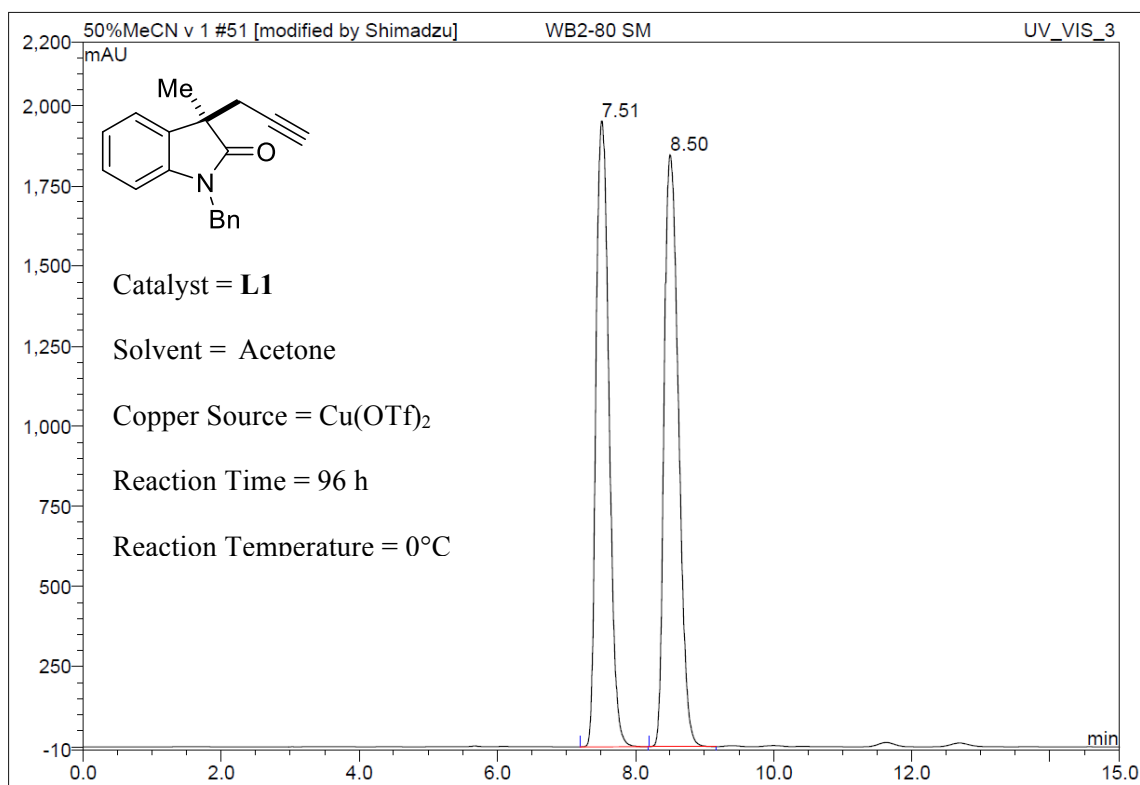

| No.    | Ret.Time<br>min | Peak Name | Height<br>mAU | Area<br>mAU*min | Rel.Area<br>% | Amount | Type |
|--------|-----------------|-----------|---------------|-----------------|---------------|--------|------|
| 1      | 7.51            | n.a.      | 1952.662      | 425.449         | 48.84         | n.a.   | BMB  |
| 2      | 8.50            | n.a.      | 1846.541      | 445.603         | 51.16         | n.a.   | BMB  |
| Total: |                 |           | 3799.203      | 871.052         | 100.00        | 0.000  |      |

**60 WB2-56 SM****Cell-3 50% MeCN 50% water, 1ml/min**

|                  |                 |                   |          |
|------------------|-----------------|-------------------|----------|
| Sample Name:     | WB2-56 SM       | Injection Volume: | 10.0     |
| Vial Number:     | 1_9             | Channel:          | UV_VIS_3 |
| Sample Type:     | unknown         | Wavelength:       | n.a.     |
| Control Program: | 50% MeCN v 1    | Bandwidth:        | n.a.     |
| Quantif. Method: | 50% MeCN v 1    | Dilution Factor:  | 1.0000   |
| Recording Time:  | 29/8/2014 15:52 | Sample Weight:    | 1.0000   |
| Run Time (min):  | 15.01           | Sample Amount:    | 1.0000   |

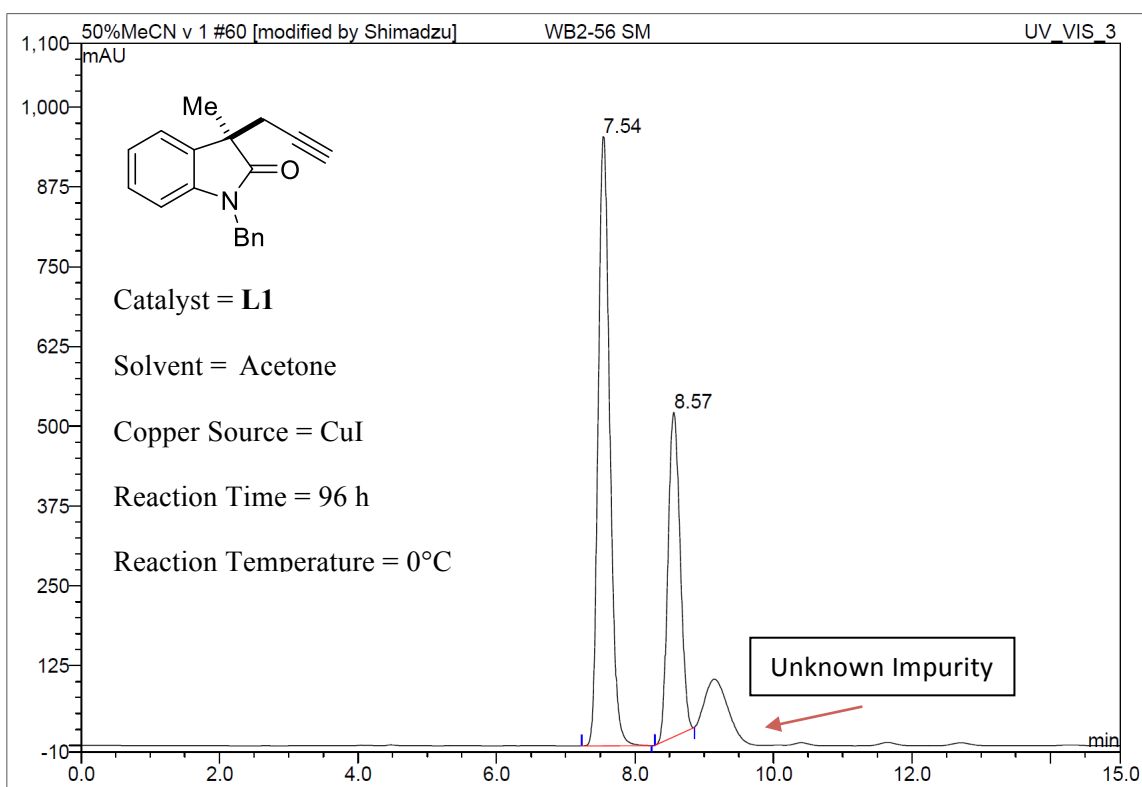

| No.    | Ret.Time<br>min | Peak Name | Height<br>mAU | Area<br>mAU*min | Rel.Area<br>% | Amount | Type |
|--------|-----------------|-----------|---------------|-----------------|---------------|--------|------|
| 1      | 7.54            | n.a.      | 954.444       | 185.554         | 64.23         | n.a.   | BMB  |
| 2      | 8.57            | n.a.      | 508.033       | 103.341         | 35.77         | n.a.   | BMB* |
| Total: |                 |           | 1462.477      | 288.895         | 100.00        | 0.000  |      |



**54 WB2-82 SM****Cell-3 50% MeCN 50% water, 1ml/min**

|                  |                 |                   |          |
|------------------|-----------------|-------------------|----------|
| Sample Name:     | WB2-82 SM       | Injection Volume: | 10.0     |
| Vial Number:     | 1_21            | Channel:          | UV_VIS_3 |
| Sample Type:     | unknown         | Wavelength:       | n.a.     |
| Control Program: | 50% MeCN v 1    | Bandwidth:        | n.a.     |
| Quantif. Method: | 50% MeCN v 1    | Dilution Factor:  | 1.0000   |
| Recording Time:  | 28/8/2014 21:03 | Sample Weight:    | 1.0000   |
| Run Time (min):  | 15.01           | Sample Amount:    | 1.0000   |

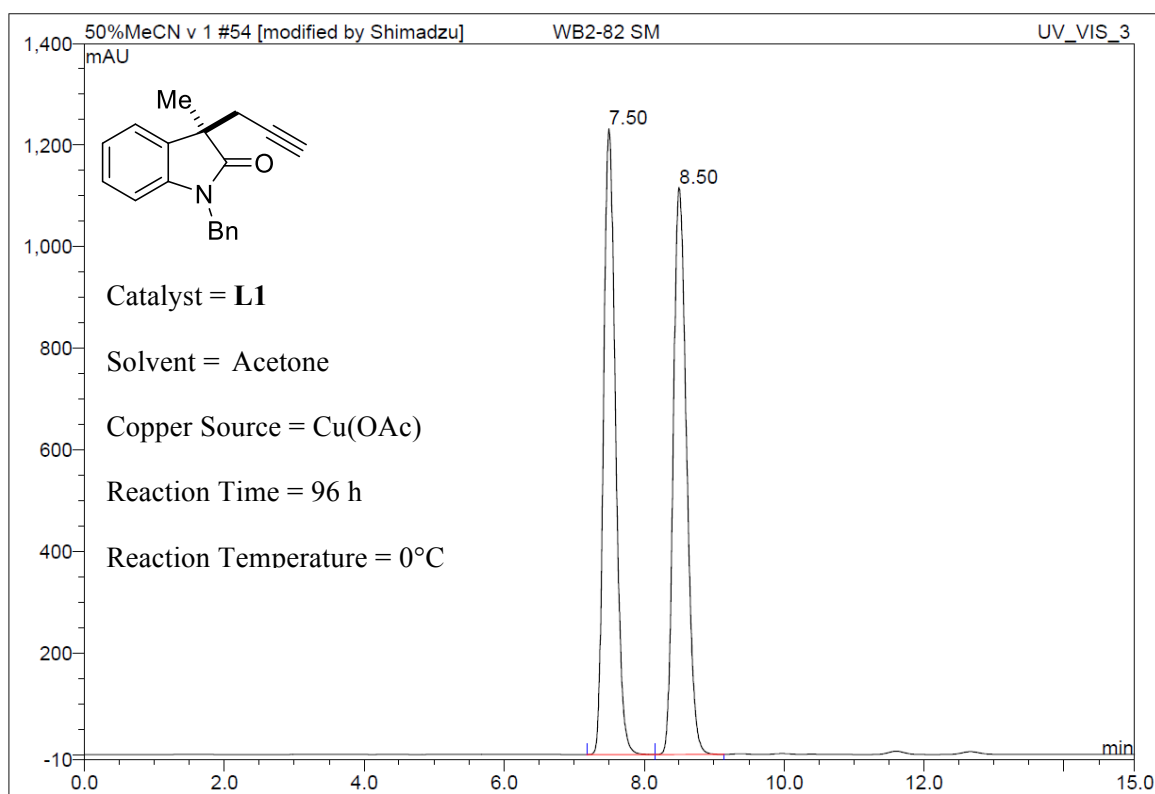

| No.    | Ret.Time<br>min | Peak Name | Height<br>mAU | Area<br>mAU*min | Rel.Area<br>% | Amount | Type |
|--------|-----------------|-----------|---------------|-----------------|---------------|--------|------|
| 1      | 7.50            | n.a.      | 1231.918      | 242.361         | 49.84         | n.a.   | BM   |
| 2      | 8.50            | n.a.      | 1116.686      | 243.884         | 50.16         | n.a.   | MB   |
| Total: |                 |           | 2348.604      | 486.245         | 100.00        | 0.000  |      |

**46 WB2-83 SM****Cell-3 50% MeCN 50% water, 1ml/min**

|                  |                 |                   |          |
|------------------|-----------------|-------------------|----------|
| Sample Name:     | WB2-83 SM       | Injection Volume: | 10.0     |
| Vial Number:     | 1_13            | Channel:          | UV_VIS_3 |
| Sample Type:     | unknown         | Wavelength:       | n.a.     |
| Control Program: | 50% MeCN v 1    | Bandwidth:        | n.a.     |
| Quantif. Method: | 50% MeCN v 1    | Dilution Factor:  | 1.0000   |
| Recording Time:  | 28/8/2014 18:59 | Sample Weight:    | 1.0000   |
| Run Time (min):  | 15.01           | Sample Amount:    | 1.0000   |

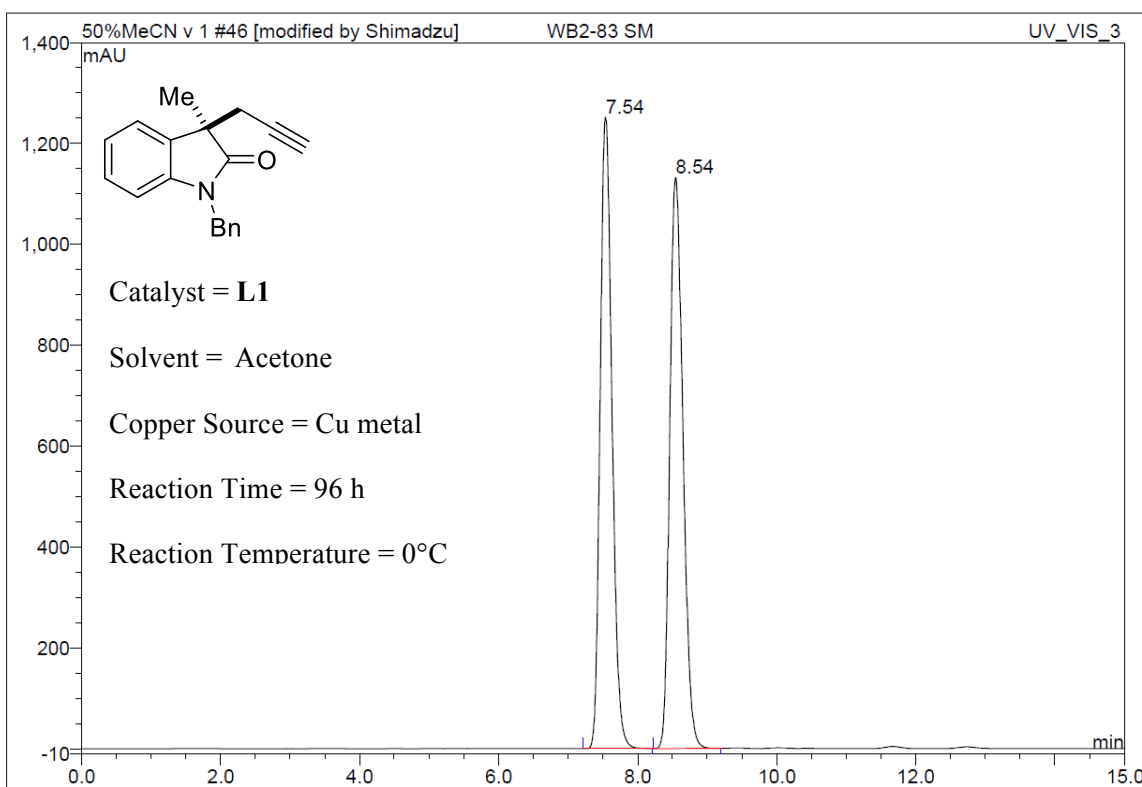

| No.    | Ret.Time min | Peak Name | Height mAU | Area mAU*min | Rel.Area % | Amount | Type |
|--------|--------------|-----------|------------|--------------|------------|--------|------|
| 1      | 7.54         | n.a.      | 1251.774   | 247.277      | 49.94      | n.a.   | BMB  |
| 2      | 8.54         | n.a.      | 1131.994   | 247.847      | 50.06      | n.a.   | BMB  |
| Total: |              |           | 2383.768   | 495.125      | 100.00     | 0.000  |      |

**45 WB2-84 SM****Cell-3 50% MeCN 50% water, 1ml/min**

|                  |                 |                   |          |
|------------------|-----------------|-------------------|----------|
| Sample Name:     | WB2-84 SM       | Injection Volume: | 10.0     |
| Vial Number:     | 1_12            | Channel:          | UV_VIS_3 |
| Sample Type:     | unknown         | Wavelength:       | n.a.     |
| Control Program: | 50% MeCN v 1    | Bandwidth:        | n.a.     |
| Quantif. Method: | 50% MeCN v 1    | Dilution Factor:  | 1.0000   |
| Recording Time:  | 28/8/2014 18:44 | Sample Weight:    | 1.0000   |
| Run Time (min):  | 15.01           | Sample Amount:    | 1.0000   |

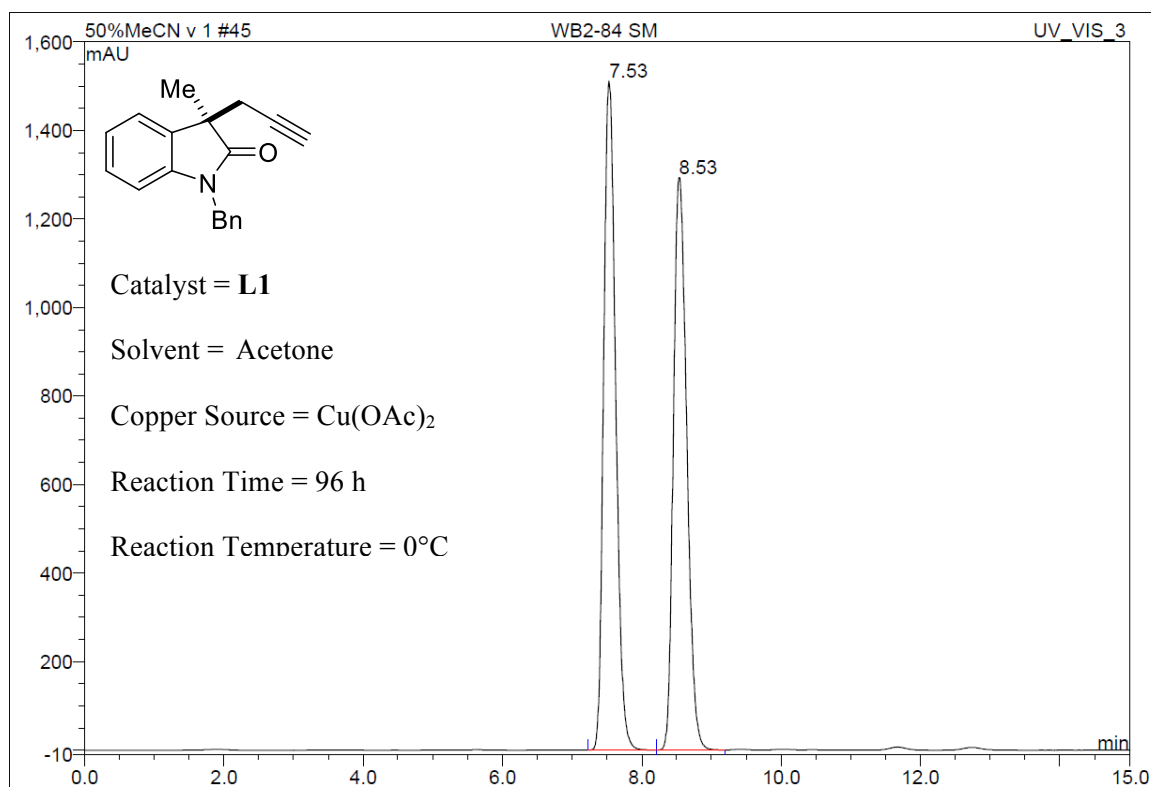

| No.    | Ret.Time<br>min | Peak Name | Height<br>mAU | Area<br>mAU*min | Rel.Area<br>% | Amount | Type |
|--------|-----------------|-----------|---------------|-----------------|---------------|--------|------|
| 1      | 7.53            | n.a.      | 1511.468      | 303.294         | 51.37         | n.a.   | BMB  |
| 2      | 8.53            | n.a.      | 1293.097      | 287.101         | 48.63         | n.a.   | BMB  |
| Total: |                 |           | 2804.565      | 590.395         | 100.00        | 0.000  |      |

**50 WB2-79 SM****Cell-3 50% MeCN 50% water, 1ml/min**

|                  |                 |                   |          |
|------------------|-----------------|-------------------|----------|
| Sample Name:     | WB2-79 SM       | Injection Volume: | 10.0     |
| Vial Number:     | 1_17            | Channel:          | UV_VIS_3 |
| Sample Type:     | unknown         | Wavelength:       | n.a.     |
| Control Program: | 50% MeCN v 1    | Bandwidth:        | n.a.     |
| Quantif. Method: | 50% MeCN v 1    | Dilution Factor:  | 1.0000   |
| Recording Time:  | 28/8/2014 20:01 | Sample Weight:    | 1.0000   |
| Run Time (min):  | 15.01           | Sample Amount:    | 1.0000   |

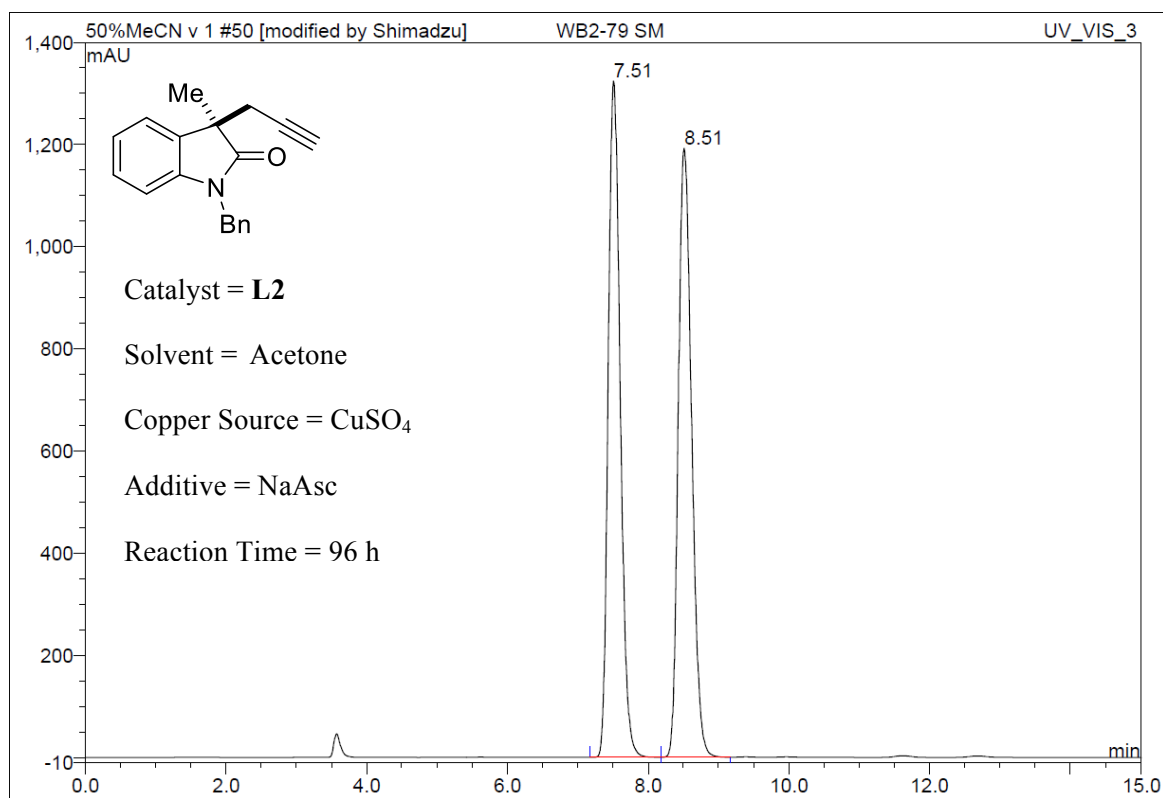

| No.    | Ret.Time<br>min | Peak Name | Height<br>mAU | Area<br>mAU*min | Rel.Area<br>% | Amount | Type |
|--------|-----------------|-----------|---------------|-----------------|---------------|--------|------|
| 1      | 7.51            | n.a.      | 1324.159      | 262.107         | 50.03         | n.a.   | BM   |
| 2      | 8.51            | n.a.      | 1192.548      | 261.744         | 49.97         | n.a.   | MB   |
| Total: |                 |           | 2516.707      | 523.851         | 100.00        | 0.000  |      |

**52 WB2-81SM****Cell-3 50% MeCN 50% water, 1ml/min**

Sample Name: **WB2-81SM**  
Vial Number: **1\_19**  
Sample Type: **unknown**  
Control Program: **50% MeCN v 1**  
Quantif. Method: **50% MeCN v 1**  
Recording Time: **28/8/2014 20:32**  
Run Time (min): **15.01**

Injection Volume: **10.0**  
Channel: **UV\_VIS\_3**  
Wavelength: **n.a.**  
Bandwidth: **n.a.**  
Dilution Factor: **1.0000**  
Sample Weight: **1.0000**  
Sample Amount: **1.0000**

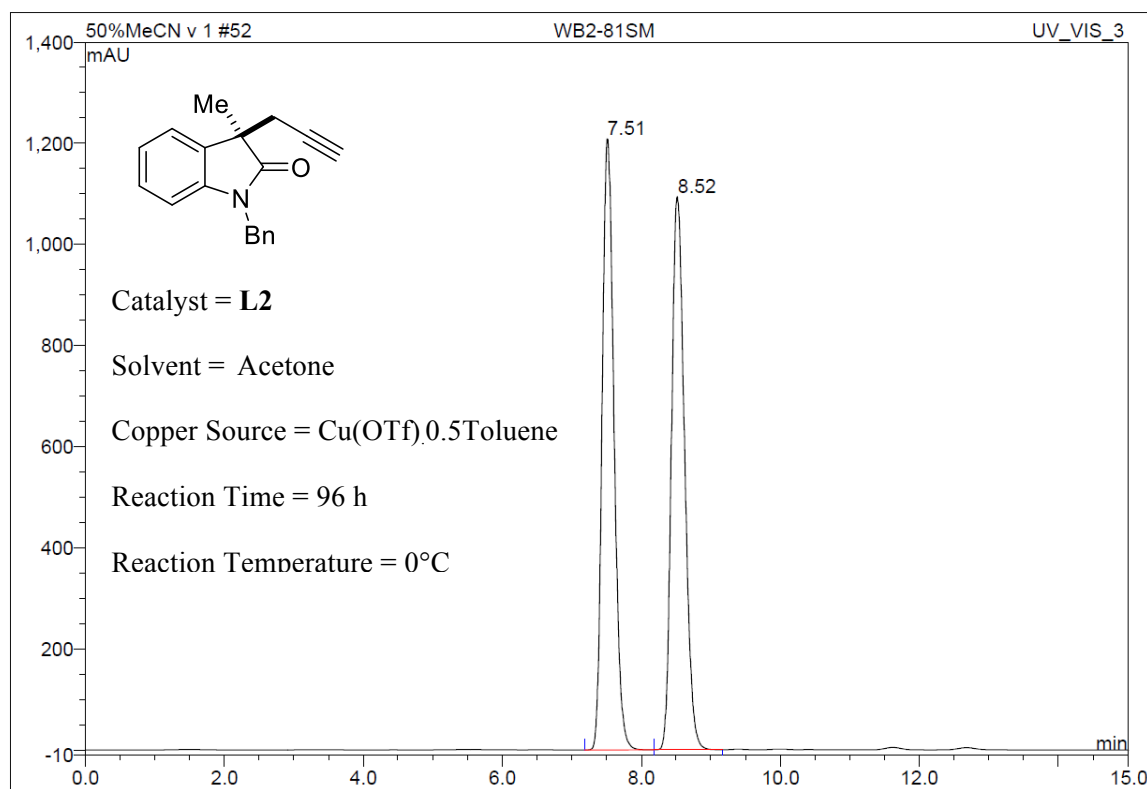

| No.    | Ret.Time<br>min | Peak Name | Height<br>mAU | Area<br>mAU*min | Rel.Area<br>% | Amount | Type |
|--------|-----------------|-----------|---------------|-----------------|---------------|--------|------|
| 1      | 7.51            | n.a.      | 1208.048      | 237.848         | 49.91         | n.a.   | BMB  |
| 2      | 8.52            | n.a.      | 1093.990      | 238.717         | 50.09         | n.a.   | BMB  |
| Total: |                 |           | 2302.038      | 476.565         | 100.00        | 0.000  |      |

**79 WB2-105-SM****Cell-3 50% MeCN 50% water, 1ml/min**

|                  |                 |                   |          |
|------------------|-----------------|-------------------|----------|
| Sample Name:     | WB2-105-SM      | Injection Volume: | 10.0     |
| Vial Number:     | 1_6             | Channel:          | UV_VIS_3 |
| Sample Type:     | unknown         | Wavelength:       | n.a.     |
| Control Program: | 50% MeCN v 1    | Bandwidth:        | n.a.     |
| Quantif. Method: | 50% MeCN v 1    | Dilution Factor:  | 1.0000   |
| Recording Time:  | 25/9/2014 13:11 | Sample Weight:    | 1.0000   |
| Run Time (min):  | 15.01           | Sample Amount:    | 1.0000   |

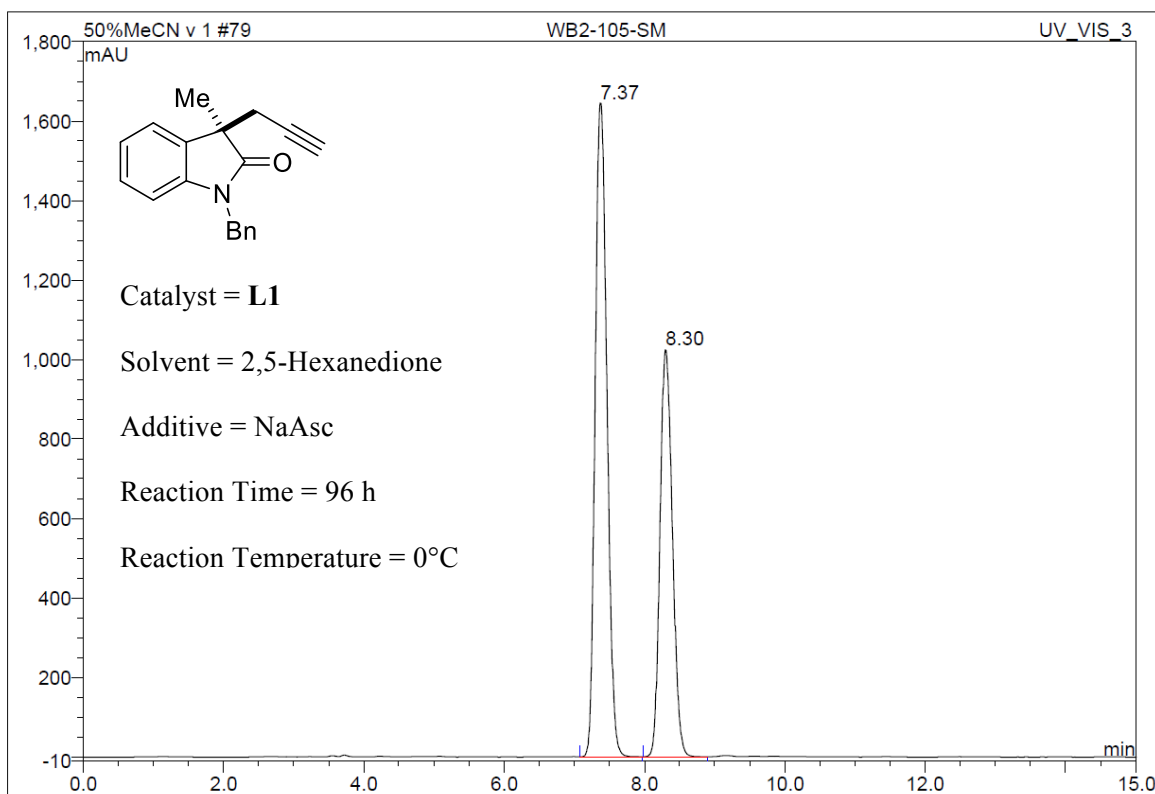

| No.    | Ret.Time<br>min | Peak Name | Height<br>mAU | Area<br>mAU*min | Rel.Area<br>% | Amount | Type |
|--------|-----------------|-----------|---------------|-----------------|---------------|--------|------|
| 1      | 7.37            | n.a.      | 1645.146      | 319.812         | 60.38         | n.a.   | BMB  |
| 2      | 8.30            | n.a.      | 1024.592      | 209.880         | 39.62         | n.a.   | BMB  |
| Total: |                 |           | 2669.738      | 529.692         | 100.00        | 0.000  |      |

**82 WB2-106-SM****Cell-3 50% MeCN 50% water, 1ml/min**

|                  |                 |                   |          |
|------------------|-----------------|-------------------|----------|
| Sample Name:     | WB2-106-SM      | Injection Volume: | 10.0     |
| Vial Number:     | 1_9             | Channel:          | UV_VIS_3 |
| Sample Type:     | unknown         | Wavelength:       | n.a.     |
| Control Program: | 50% MeCN v 1    | Bandwidth:        | n.a.     |
| Quantif. Method: | 50% MeCN v 1    | Dilution Factor:  | 1.0000   |
| Recording Time:  | 25/9/2014 13:57 | Sample Weight:    | 1.0000   |
| Run Time (min):  | 15.01           | Sample Amount:    | 1.0000   |

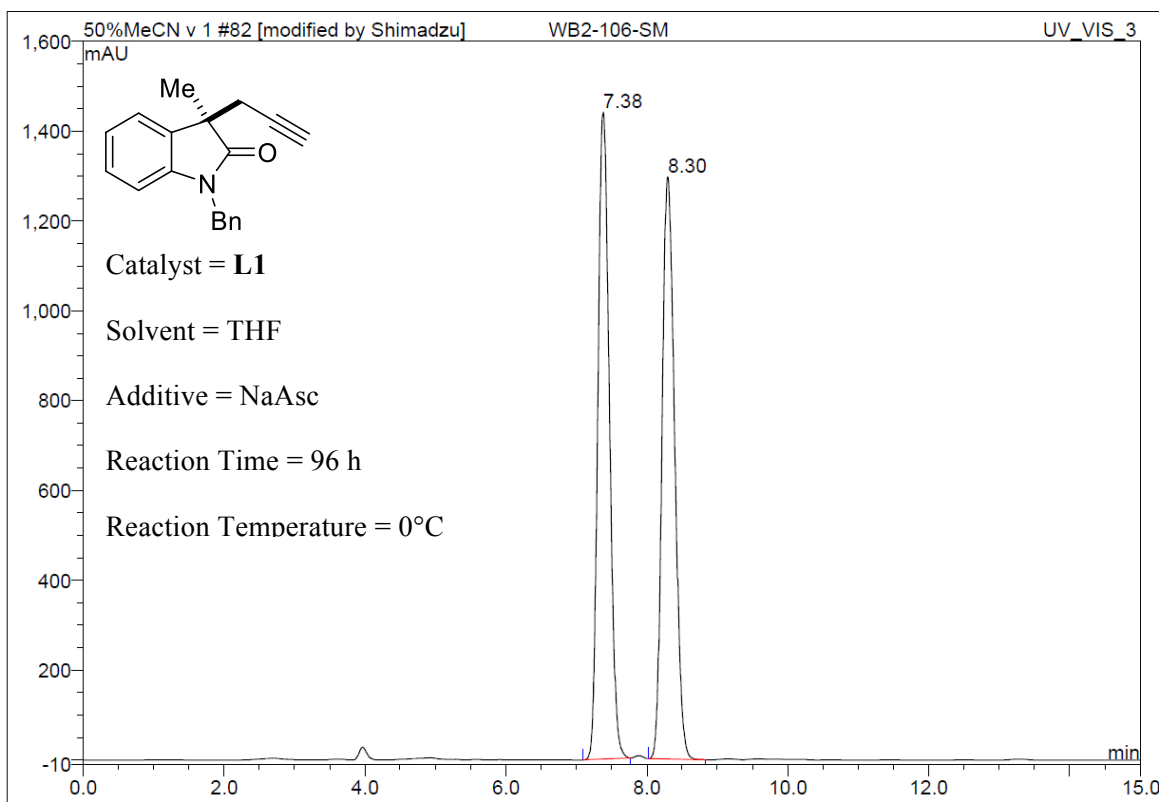

| No.    | Ret.Time<br>min | Peak Name | Height<br>mAU | Area<br>mAU*min | Rel.Area<br>% | Amount | Type |
|--------|-----------------|-----------|---------------|-----------------|---------------|--------|------|
| 1      | 7.38            | n.a.      | 1440.567      | 271.121         | 50.34         | n.a.   | BMB  |
| 2      | 8.30            | n.a.      | 1296.554      | 267.461         | 49.66         | n.a.   | BMB  |
| Total: |                 |           | 2737.121      | 538.581         | 100.00        | 0.000  |      |

**81 WB2-108-SM****Cell-3 50% MeCN 50% water, 1ml/min**

|                  |                 |                   |          |
|------------------|-----------------|-------------------|----------|
| Sample Name:     | WB2-108-SM      | Injection Volume: | 10.0     |
| Vial Number:     | 1_8             | Channel:          | UV_VIS_3 |
| Sample Type:     | unknown         | Wavelength:       | n.a.     |
| Control Program: | 50% MeCN v 1    | Bandwidth:        | n.a.     |
| Quantif. Method: | 50% MeCN v 1    | Dilution Factor:  | 1.0000   |
| Recording Time:  | 25/9/2014 13:42 | Sample Weight:    | 1.0000   |
| Run Time (min):  | 15.01           | Sample Amount:    | 1.0000   |

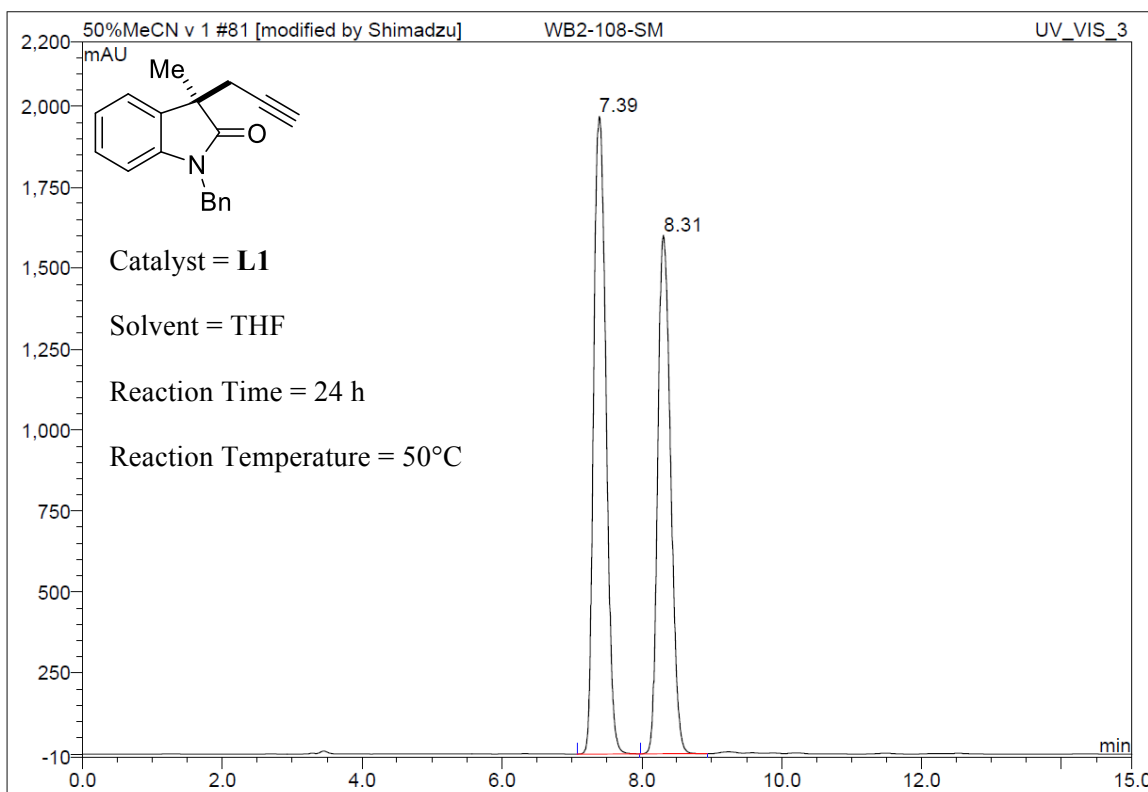

| No.    | Ret.Time<br>min | Peak Name | Height<br>mAU | Area<br>mAU*min | Rel.Area<br>% | Amount | Type |
|--------|-----------------|-----------|---------------|-----------------|---------------|--------|------|
| 1      | 7.39            | n.a.      | 1968.651      | 401.712         | 53.91         | n.a.   | BMB  |
| 2      | 8.31            | n.a.      | 1600.731      | 343.426         | 46.09         | n.a.   | BMB  |
| Total: |                 |           | 3569.382      | 745.138         | 100.00        | 0.000  |      |



**96 WB2-134-SM****Cell-3 50% MeCN 50% water, 1ml/min,**

|                  |                  |                   |          |
|------------------|------------------|-------------------|----------|
| Sample Name:     | WB2-134-SM       | Injection Volume: | 10.0     |
| Vial Number:     | 1_2              | Channel:          | UV_VIS_3 |
| Sample Type:     | unknown          | Wavelength:       | n.a.     |
| Control Program: | 50% MeCN v 1     | Bandwidth:        | n.a.     |
| Quantif. Method: | 50% MeCN v 1     | Dilution Factor:  | 1.0000   |
| Recording Time:  | 14/10/2014 17:28 | Sample Weight:    | 1.0000   |
| Run Time (min):  | 15.01            | Sample Amount:    | 1.0000   |

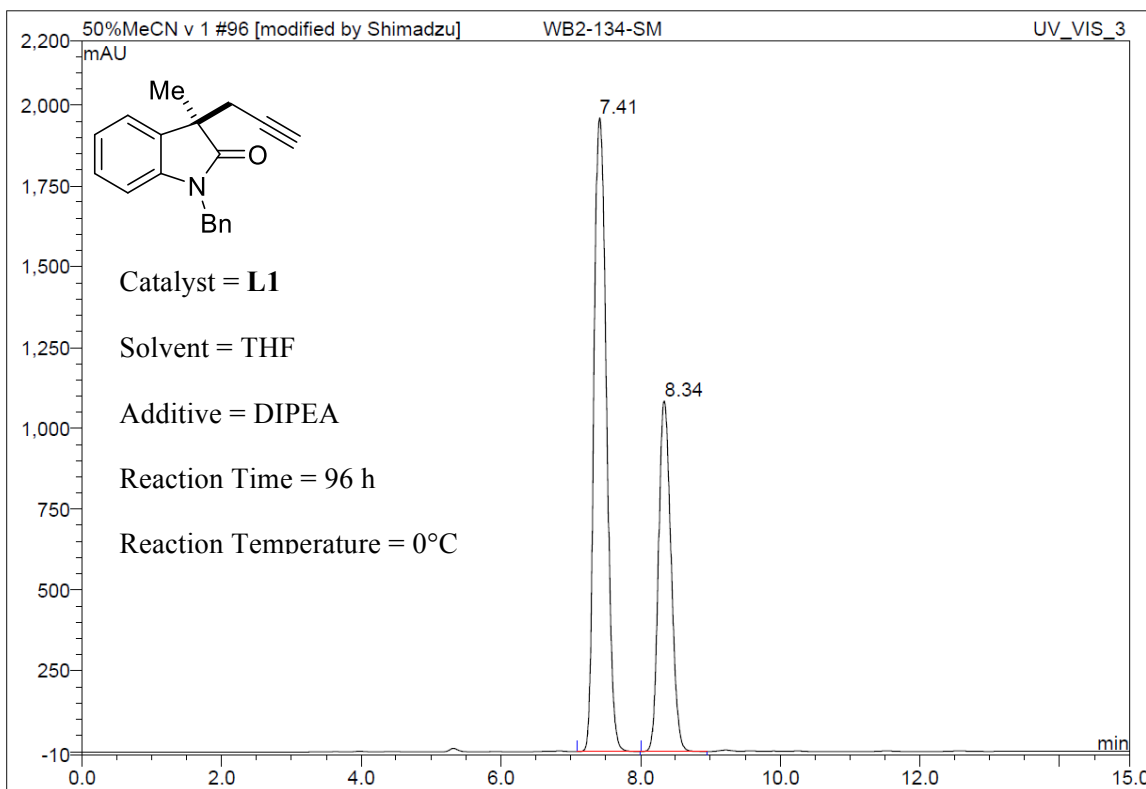

| No.    | Ret.Time<br>min | Peak Name | Height<br>mAU | Area<br>mAU*min | Rel.Area<br>% | Amount | Type |
|--------|-----------------|-----------|---------------|-----------------|---------------|--------|------|
| 1      | 7.41            | n.a.      | 1959.693      | 404.546         | 64.31         | n.a.   | BMB  |
| 2      | 8.34            | n.a.      | 1084.948      | 224.517         | 35.69         | n.a.   | BMB  |
| Total: |                 |           | 3044.641      | 629.063         | 100.00        | 0.000  |      |

**98 WB2-136-SM****Cell-3 50% MeCN 50% water, 1ml/min,**

|                  |                  |                   |          |
|------------------|------------------|-------------------|----------|
| Sample Name:     | WB2-136-SM       | Injection Volume: | 10.0     |
| Vial Number:     | 1_4              | Channel:          | UV_VIS_3 |
| Sample Type:     | unknown          | Wavelength:       | n.a.     |
| Control Program: | 50% MeCN v 1     | Bandwidth:        | n.a.     |
| Quantif. Method: | 50% MeCN v 1     | Dilution Factor:  | 1.0000   |
| Recording Time:  | 14/10/2014 17:59 | Sample Weight:    | 1.0000   |
| Run Time (min):  | 15.01            | Sample Amount:    | 1.0000   |

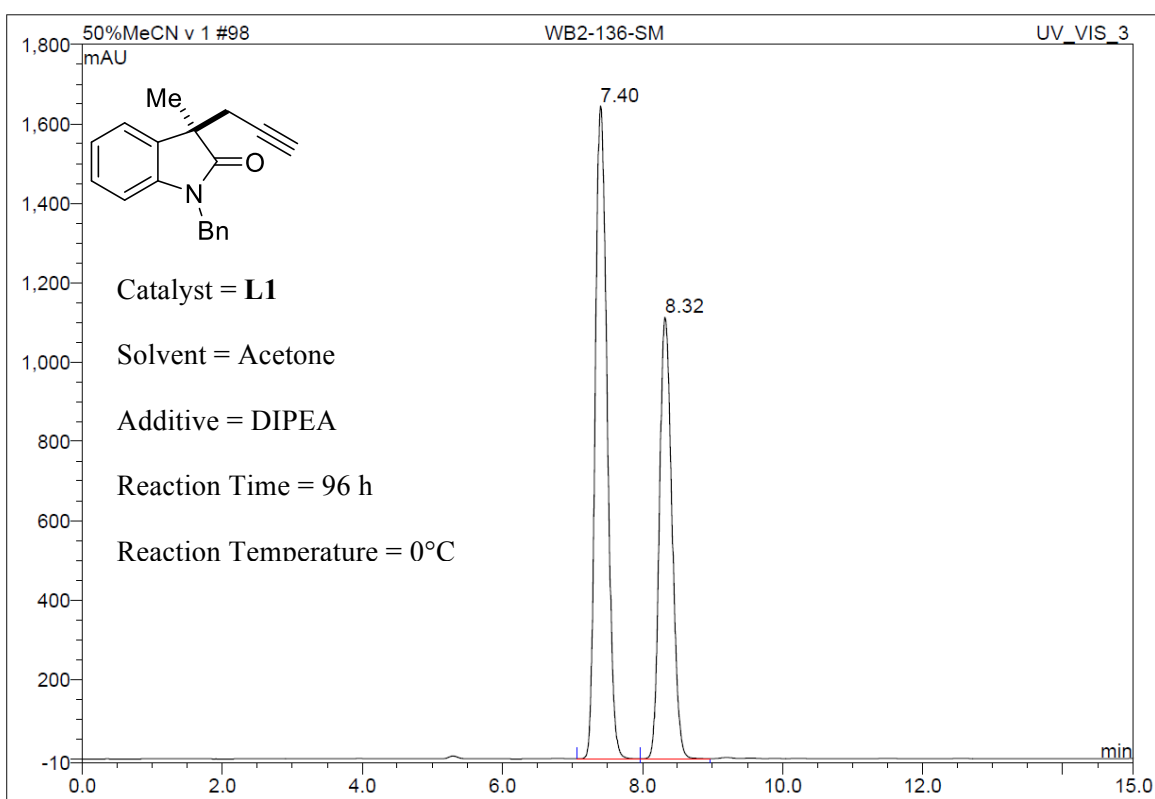

| No.    | Ret.Time<br>min | Peak Name | Height<br>mAU | Area<br>mAU*min | Rel.Area<br>% | Amount | Type |
|--------|-----------------|-----------|---------------|-----------------|---------------|--------|------|
| 1      | 7.40            | n.a.      | 1645.227      | 320.375         | 58.18         | n.a.   | BM   |
| 2      | 8.32            | n.a.      | 1112.746      | 230.268         | 41.82         | n.a.   | MB   |
| Total: |                 |           | 2757.973      | 550.643         | 100.00        | 0.000  |      |

**27 WB3-178 SM****Cell 3, 50% MeCN 50% Water**

|                  |                            |                   |          |
|------------------|----------------------------|-------------------|----------|
| Sample Name:     | WB3-178 SM                 | Injection Volume: | 10.0     |
| Vial Number:     | 1_6                        | Channel:          | UV_VIS_1 |
| Sample Type:     | unknown                    | Wavelength:       | 254      |
| Control Program: | Isocratic 50 50 water MeCN | Bandwidth:        | n.a.     |
| Quantif. Method: | Isocratic 50 50 water MeCN | Dilution Factor:  | 1.0000   |
| Recording Time:  | 17/4/2015 18:57            | Sample Weight:    | 1.0000   |
| Run Time (min):  | 30.00                      | Sample Amount:    | 1.0000   |

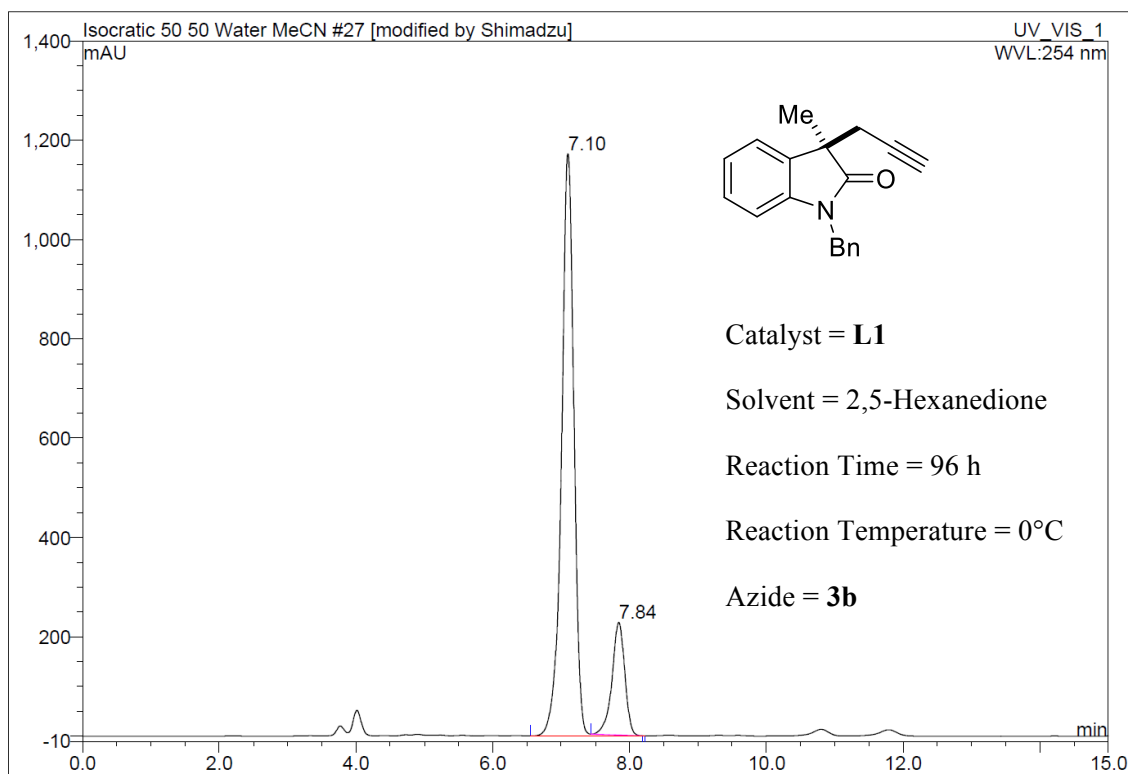

| No.    | Ret.Time<br>min | Peak Name | Height<br>mAU | Area<br>mAU*min | Rel.Area<br>% | Amount | Type |
|--------|-----------------|-----------|---------------|-----------------|---------------|--------|------|
| 1      | 7.10            | n.a.      | 1171.835      | 247.375         | 83.43         | n.a.   | BMB  |
| 2      | 7.84            | n.a.      | 226.589       | 49.139          | 16.57         | n.a.   | Rd   |
| Total: |                 |           | 1398.424      | 296.514         | 100.00        | 0.000  |      |

**33 WB3-184 SM****Cell 3, 50% MeCN 50% Water**

|                  |                            |                   |          |
|------------------|----------------------------|-------------------|----------|
| Sample Name:     | WB3-184 SM                 | Injection Volume: | 10.0     |
| Vial Number:     | 1_12                       | Channel:          | UV_VIS_1 |
| Sample Type:     | unknown                    | Wavelength:       | 254      |
| Control Program: | Isocratic 50 50 water MeCN | Bandwidth:        | n.a.     |
| Quantif. Method: | Isocratic 50 50 water MeCN | Dilution Factor:  | 1.0000   |
| Recording Time:  | 17/4/2015 21:31            | Sample Weight:    | 1.0000   |
| Run Time (min):  | 30.00                      | Sample Amount:    | 1.0000   |

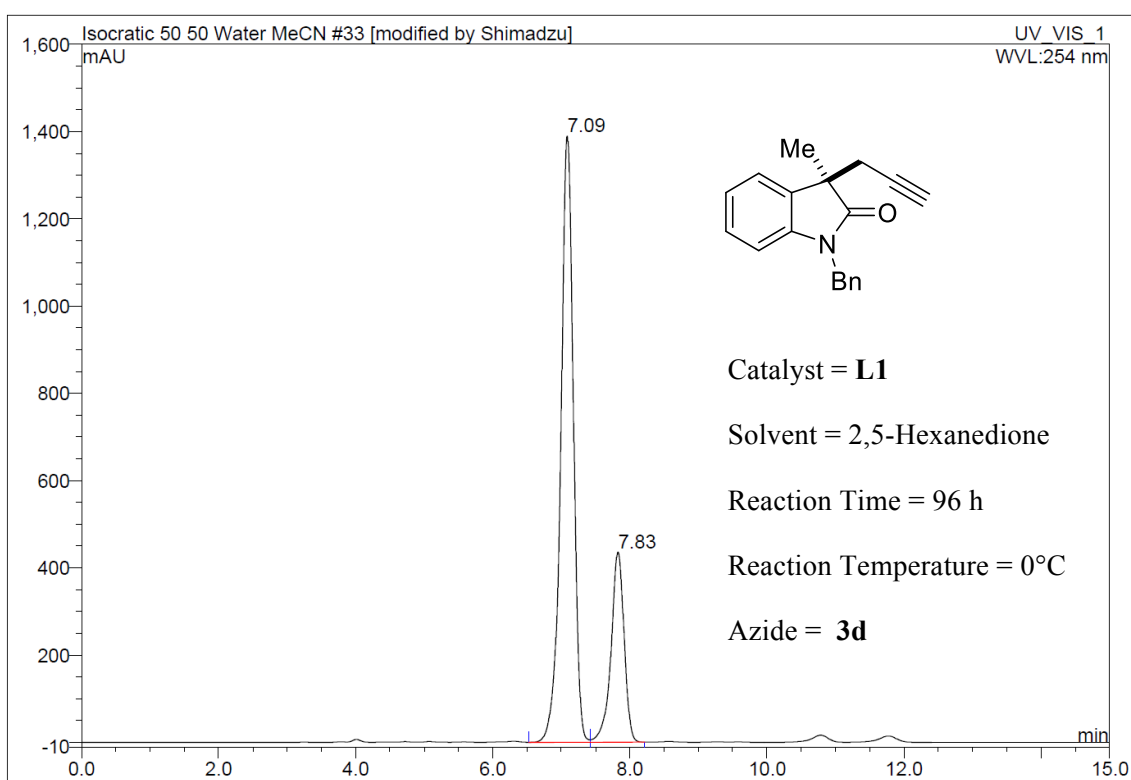

| No.    | Ret.Time<br>min | Peak Name | Height<br>mAU | Area<br>mAU*min | Rel.Area<br>% | Amount | Type |
|--------|-----------------|-----------|---------------|-----------------|---------------|--------|------|
| 1      | 7.09            | n.a.      | 1389.235      | 295.485         | 75.38         | n.a.   | BM   |
| 2      | 7.83            | n.a.      | 435.236       | 96.528          | 24.62         | n.a.   | MB   |
| Total: |                 |           | 1824.471      | 392.012         | 100.00        | 0.000  |      |

**36 WB1-157-3****Cell-3 40% MeCN 60% water, 1ml/min**

Sample Name: **WB1-157-3**  
Vial Number: **1\_5**  
Sample Type: **unknown**  
Control Program: **40% MeCN v 1**  
Quantif. Method: **40% MeCN v 1**  
Recording Time: **28/8/2014 15:00**  
Run Time (min): **27.18**

Injection Volume: **10.0**  
Channel: **UV\_VIS\_3**  
Wavelength: **n.a.**  
Bandwidth: **n.a.**  
Dilution Factor: **1.0000**  
Sample Weight: **1.0000**  
Sample Amount: **1.0000**

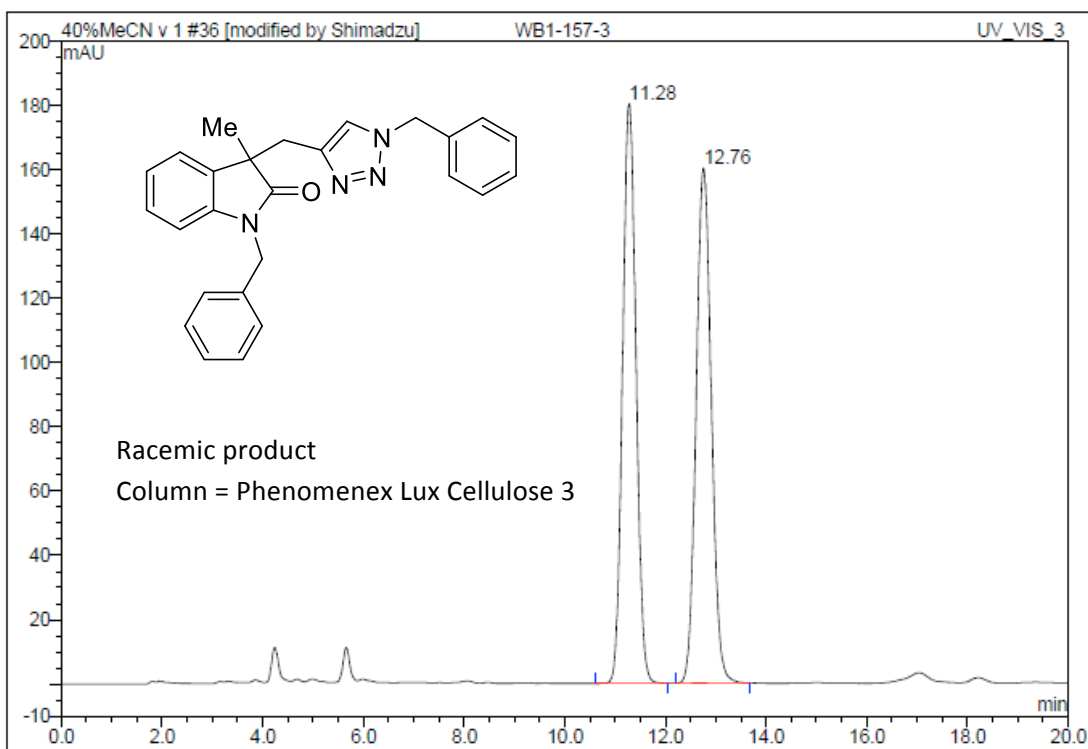

| No.    | Ret.Time<br>min | Peak Name | Height<br>mAU | Area<br>mAU*min | Rel.Area<br>% | Amount | Type |
|--------|-----------------|-----------|---------------|-----------------|---------------|--------|------|
| 1      | 11.28           | n.a.      | 180.202       | 55.610          | 49.83         | n.a.   | BMB  |
| 2      | 12.76           | n.a.      | 160.133       | 55.988          | 50.17         | n.a.   | BMB  |
| Total: |                 |           | 340.335       | 111.598         | 100.00        | 0.000  |      |

**205 WB3-152 P****40% MeCN 60% water Cell-3, 1ml/min**

Sample Name: **WB3-152 P**  
Vial Number: **1\_9**  
Sample Type: **unknown**  
Control Program: **40% MeCN v 1**  
Quantif. Method: **40% MeCN v 1**  
Recording Time: **31/3/2015 15:12**  
Run Time (min): **30.01**

Injection Volume: **10.0**  
Channel: **UV\_VIS\_3**  
Wavelength: **n.a.**  
Bandwidth: **n.a.**  
Dilution Factor: **1.0000**  
Sample Weight: **1.0000**  
Sample Amount: **1.0000**

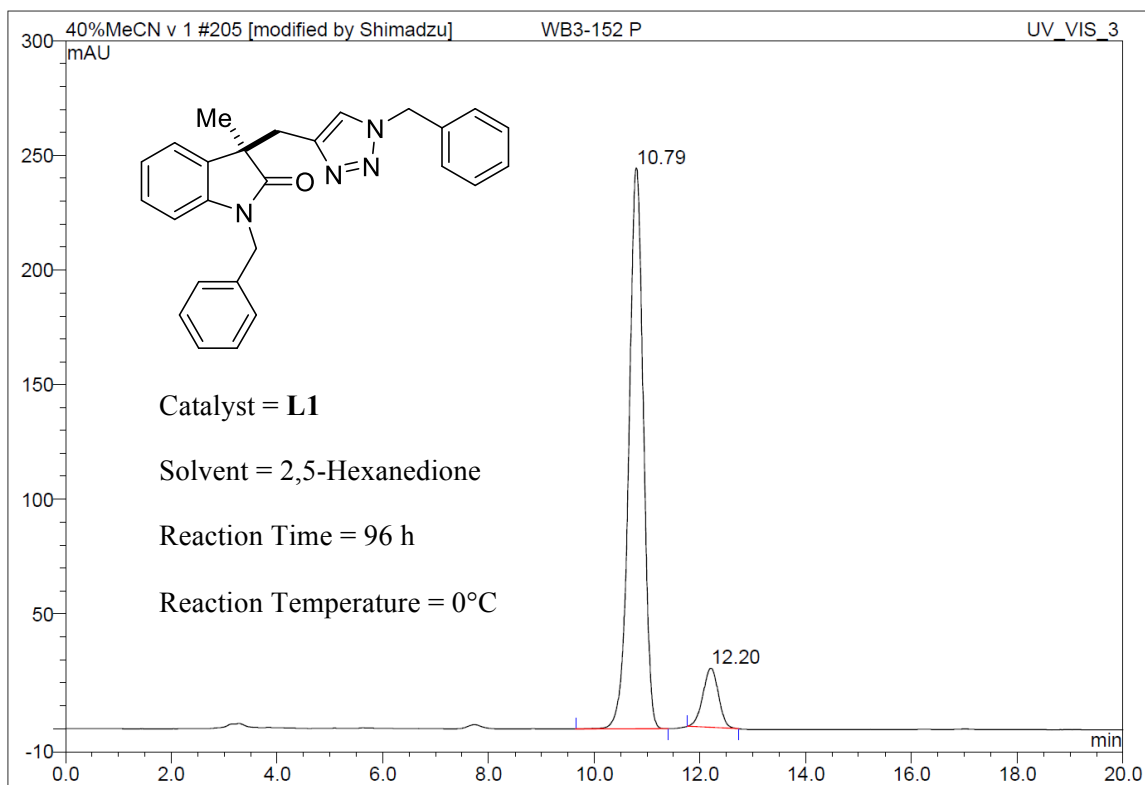

| No.    | Ret.Time<br>min | Peak Name | Height<br>mAU | Area<br>mAU*min | Rel.Area<br>% | Amount | Type |
|--------|-----------------|-----------|---------------|-----------------|---------------|--------|------|
| 1      | 10.79           | n.a.      | 244.634       | 77.375          | 89.78         | n.a.   | BMB  |
| 2      | 12.20           | n.a.      | 25.753        | 8.810           | 10.22         | n.a.   | BMB* |
| Total: |                 |           | 270.387       | 86.184          | 100.00        | 0.000  |      |

## References

- (1) Rossy, C.; Majimel, J.; Delapierre, M. T.; Fouquet, E.; Felpin, F.-X. *J. Organomet. Chem.* **2014**, 755, 78.
- (2) Kulkarni, S. S.; Hu, X.; Manetsch, R. *Chem. Commun.* **2013**, 49, 1193.
- (3) Pramanik, S.; Ghorai, P. *Org. Lett.* **2014**, 16, 2104.
